# Supplementary material for: H/D exchange under mild conditions in arenes and unactivated alkanes with C 6 D 6 and D 2 O using rigid, electron-rich iridium PCP pincer complexes
Source: Royal Society of Chemistry journal article supplement (doi:10.1039/d0sc02694h), 2020-01-01
Supplement: d0sc02694h1.pdf [file d0sc02694h1.pdf]

# H/D Exchange Under Mild Conditions in Arenes and Unactivated Alkanes with C<sub>6</sub>D<sub>6</sub> and D<sub>2</sub>O Using Rigid, Electron-rich Iridium PCP Pincer Complexes

Joel D. Smith,<sup>a</sup> George Durrant,<sup>b</sup> Daniel H. Ess<sup>b</sup>, Benjamin S. Gelfand<sup>a</sup> and Warren E. Piers<sup>a\*</sup>

<sup>a</sup>*Department of Chemistry, University of Calgary, 2500 University Drive NW, Calgary, Alberta, T2N 1N4, Canada*

<sup>b</sup>*Department of Chemistry and Biochemistry, Brigham Young University, Provo, Utah, 84602, USA*

Email: wpiers@ucalgary.ca

Supporting Information

## Table of Contents

### Characterization Data used for Determining Polyhydride Isomers Present in Solution

|                                                                                                                                                                     |           |
|---------------------------------------------------------------------------------------------------------------------------------------------------------------------|-----------|
| <b>Figure S1.</b> Variable Temperature T <sub>1</sub> data for <b>Ir-H<sub>4</sub></b> .....                                                                        | <b>S3</b> |
| <b>Figure S2.</b> <sup>1</sup> H{ <sup>31</sup> P} NMR spectrum for hydridic region of <b>Ir-D<sub>4</sub></b> (> 97 %) and <b>Ir-HD<sub>3</sub></b> (< 3%).....    | <b>S3</b> |
| <b>Table S1.</b> T <sub>1</sub> (min) relaxation times, H-D Coupling constants and calculated H-H distances for <b>Ir-H<sub>4</sub></b> and related complexes ..... | <b>S4</b> |
| <b>Figure S3.</b> Variable Temperature <sup>1</sup> H { <sup>31</sup> P} and <sup>1</sup> H NMR spectra of the hydridic protons of <b>Ir-H<sub>4</sub></b> .....    | <b>S4</b> |

### NMR Data Demonstrating the Formation of Ir-H<sub>3</sub> under Vacuum

|                                                                                                                                                         |           |
|---------------------------------------------------------------------------------------------------------------------------------------------------------|-----------|
| <b>Figure S4.</b> <sup>31</sup> P { <sup>1</sup> H} and <sup>1</sup> H NMR spectra of <b>Ir-H<sub>4</sub></b> heated under static vacuum to 80 °C ..... | <b>S5</b> |
| <b>Figure S5.</b> <sup>1</sup> H NMR spectra of <b>Ir-H<sub>4</sub></b> heated under static vacuum to 80 °C .....                                       | <b>S6</b> |

### Reactions demonstrating H/D exchange within Ir-H<sub>4</sub>, Ir-Ph and Ir-H<sub>3</sub>

|                                                                                                                                                              |           |
|--------------------------------------------------------------------------------------------------------------------------------------------------------------|-----------|
| <b>Figure S6.</b> <sup>1</sup> H NMR spectra of <b>Ir-H<sub>4</sub></b> heated to 65 °C in C <sub>6</sub> D <sub>6</sub> for 24 hours .....                  | <b>S7</b> |
| <b>Figure S7.</b> <sup>1</sup> H NMR spectra of <b>Ir-H<sub>4</sub></b> and <b>Ir-Ph</b> heated to 65 °C in C <sub>6</sub> D <sub>6</sub> for 24 hours ..... | <b>S8</b> |
| <b>Figure S8.</b> <sup>1</sup> H NMR spectra of <b>Ir-Ph</b> heated to 65 °C in C <sub>6</sub> D <sub>6</sub> for 24 hours .....                             | <b>S9</b> |

### Hydrogen Isotope Exchange with D<sub>2</sub>O

|                                                                                                                |            |
|----------------------------------------------------------------------------------------------------------------|------------|
| <b>Table S2.</b> Optimization of conditions for deuteration of <i>meta</i> -xylene with D <sub>2</sub> O ..... | <b>S10</b> |
|----------------------------------------------------------------------------------------------------------------|------------|

### Characterization Data for Ir-OH

|                                                                                                                                                                                        |            |
|----------------------------------------------------------------------------------------------------------------------------------------------------------------------------------------|------------|
| <b>Figure S9.</b> <sup>1</sup> H NMR, <sup>13</sup> C { <sup>1</sup> H} NMR, and <sup>31</sup> P { <sup>1</sup> H} NMR spectra for <b>Ir-OH</b> in C <sub>6</sub> D <sub>6</sub> ..... | <b>S11</b> |
|----------------------------------------------------------------------------------------------------------------------------------------------------------------------------------------|------------|

### Characterization Data for Ir-H<sub>4</sub>

|                                                                                                                                                                                 |            |
|---------------------------------------------------------------------------------------------------------------------------------------------------------------------------------|------------|
| <b>Figure S10.</b> $^1\text{H}$ NMR, $^{13}\text{C}$ $\{^1\text{H}\}$ NMR, and $^{31}\text{P}$ $\{^1\text{H}\}$ NMR spectra for <b>Ir-H4</b> in $\text{C}_6\text{D}_{12}$ ..... | <b>S12</b> |
| <b>Figure S11.</b> $^1\text{H}$ - $^{13}\text{C}$ HSQC data for <b>Ir-H4</b> .....                                                                                              | <b>S13</b> |
| <b>Figure S12.</b> $^1\text{H}$ - $^{13}\text{C}$ HMBC data for <b>Ir-H4</b> .....                                                                                              | <b>S14</b> |
| <b>Figure S13.</b> Infrared spectra of <b>Ir-H4</b> in KBr and in cyclohexane.....                                                                                              | <b>S15</b> |
| <b>Characterization Data for Ir-D4</b>                                                                                                                                          |            |
| <b>Figure S14.</b> $^1\text{H}$ and $^{31}\text{P}\{^1\text{H}\}$ NMR spectra for a mixture of <b>Ir-D4</b> (>97 %) and <b>Ir-HD3</b> (< 3%) in $\text{C}_6\text{D}_6$ .....    | <b>S16</b> |
| <b>Characterization Data for Ir-Ph</b>                                                                                                                                          |            |
| <b>Figure S15.</b> $^1\text{H}$ NMR, $^{13}\text{C}$ $\{^1\text{H}\}$ NMR, and $^{31}\text{P}$ $\{^1\text{H}\}$ NMR spectra for <b>Ir-Ph</b> in $\text{C}_6\text{D}_6$ .....    | <b>S17</b> |
| <b>Figure S16.</b> $^1\text{H}$ - $^{13}\text{C}$ HSQC data for <b>Ir-Ph</b> .....                                                                                              | <b>S18</b> |
| <b>Figure S17.</b> $^1\text{H}$ - $^{13}\text{C}$ HMBC data for <b>Ir-Ph</b> .....                                                                                              | <b>S19</b> |
| <b>Characterization Data for Ir-H3</b>                                                                                                                                          |            |
| <b>Figure S18.</b> $^{31}\text{P}$ $\{^1\text{H}\}$ NMR resulting from a mixture of <b>Ir-H4</b> and <b>Ir-Ph</b> in $\text{C}_6\text{H}_6$ .....                               | <b>S20</b> |
| <b>Figure S19.</b> $^1\text{H}$ NMR resulting from a mixture of <b>Ir-H4</b> and <b>Ir-Ph</b> in $\text{C}_6\text{H}_6$ .....                                                   | <b>S21</b> |
| <b>Figure S20.</b> $^{13}\text{C}$ $\{^1\text{H}\}$ NMR resulting from a mixture of <b>Ir-H4</b> and <b>Ir-Ph</b> in $\text{C}_6\text{H}_6$ .....                               | <b>S22</b> |
| <b>Figure S21.</b> $^1\text{H}$ - $^{13}\text{C}$ HMBC resulting from a mixture of <b>Ir-H4</b> and <b>Ir-Ph</b> in $\text{C}_6\text{H}_6$ .....                                | <b>S23</b> |
| <b>Deuteration of <i>m</i>-xylene (Example in Figure 4)</b>                                                                                                                     |            |
| <b>Figure S22.</b> $^1\text{H}$ and $^2\text{H}$ NMR spectra for exhaustive deuteration of <i>m</i> -xylene .....                                                               | <b>S24</b> |
| <b>Figure S23.</b> $^1\text{H}$ and $^2\text{H}$ NMR spectra for selective deuteration of <i>m</i> -xylene .....                                                                | <b>S25</b> |
| <b>Figure S24.</b> $^1\text{H}$ and $^2\text{H}$ NMR spectra for deuteration of <i>m</i> -xylene with $\text{D}_2\text{O}$ .....                                                | <b>S26</b> |
| <b>NMR Spectra of Deuterated Compounds from Neat Reactions</b>                                                                                                                  |            |
| <b>Figure S25.</b> NMR spectra following deuteration of neat benzene.....                                                                                                       | <b>S27</b> |
| <b>Figure S26.</b> NMR spectra following deuteration of neat fluorobenzene.....                                                                                                 | <b>S28</b> |
| <b>Figure S27.</b> NMR spectra following deuteration of neat THF .....                                                                                                          | <b>S29</b> |
| <b>Figure S28.</b> NMR spectra following deuteration of neat <i>n</i> -heptane .....                                                                                            | <b>S30</b> |
| <b>Crystallographic Details</b>                                                                                                                                                 |            |
| <b>Table S3.</b> Crystal Data Collection and Refinement Parameters for <b>Ir-H4</b> and <b>Ir-Ph</b> .....                                                                      | <b>S31</b> |
| <b>DFT Calculation</b> .....                                                                                                                                                    | <b>S32</b> |
| <b>Cartesian Coordinates for Structures Calculated using M06 DFT.</b> .....                                                                                                     | <b>S32</b> |
| <b>References</b> .....                                                                                                                                                         | <b>S62</b> |

## Characterization Data used for Determining Polyhydride Isomers Present in Solution

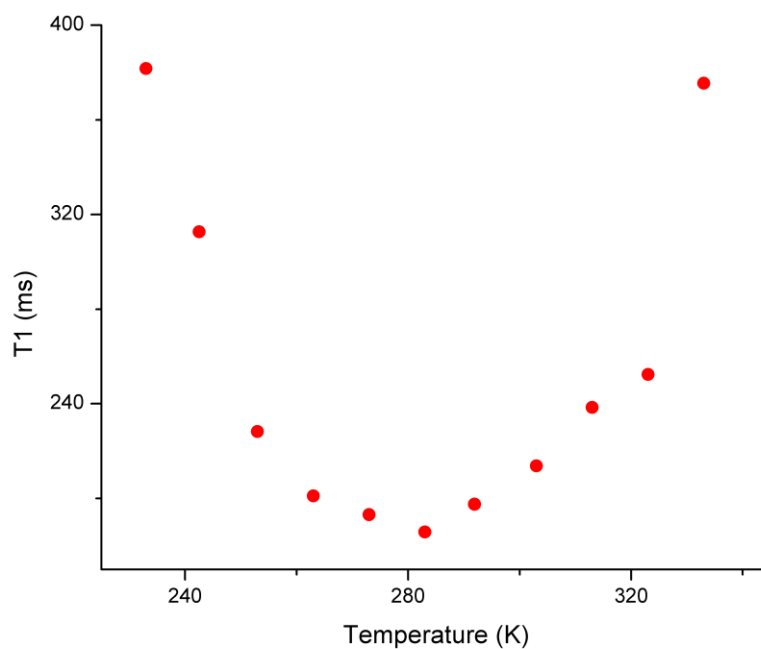

**Figure S1.** Variable Temperature  $T_1$  data for **Ir-H<sub>4</sub>**. Measured in methylcyclohexane- $d_{14}$  using  $^1\text{H}$  NMR at 600 MHz.

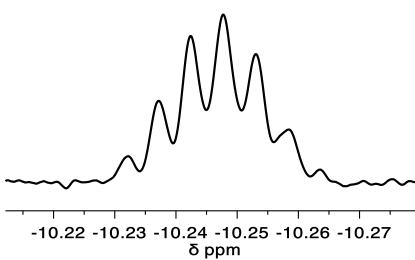

**Figure S2.**  $^1\text{H}\{^{31}\text{P}\}$  NMR spectrum (50 °C, methylcyclohexane- $d_{14}$ , 600 MHz) for hydridic region of **Ir-D<sub>4</sub>** (< 97 %) and **Ir-HD<sub>3</sub>** (< 3 %).

**Table S1.** T1 (min) relaxation times, H-D Coupling constants and calculated H-H distances for **Ir-H4** and related complexes.

|                                                          | Compound                                                                          |                                                                                   |                                                                                   |                                                                                     |                                                                                     |
|----------------------------------------------------------|-----------------------------------------------------------------------------------|-----------------------------------------------------------------------------------|-----------------------------------------------------------------------------------|-------------------------------------------------------------------------------------|-------------------------------------------------------------------------------------|
|                                                          | 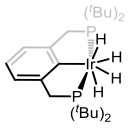 |  |  |  |  |
|                                                          | Heinekey                                                                          | Wendt                                                                             | Piers                                                                             |                                                                                     |                                                                                     |
| T <sub>1</sub> (min), ms                                 | 130 (-53 °C) <sup>a</sup>                                                         | 110 (-53 °C) <sup>a</sup>                                                         | 154 (-50 °C) <sup>b</sup>                                                         | 158 (-30 °C) <sup>c</sup>                                                           | 155 (10 °C) <sup>bc</sup>                                                           |
| J <sub>obs,HD</sub> , Hz; (Ir-HD <sub>3</sub> )          | 3.5 ± 0.1                                                                         | 4.4 ± 0.1                                                                         | 3.0 ± 0.1                                                                         | 3.0 ± 0.1                                                                           | 3.1 ± 0.1                                                                           |
| <sup>1</sup> J <sub>HD</sub> , Hz; (Ir-HD <sub>3</sub> ) | 25 ± 5                                                                            | 22 ± 5                                                                            | 18 ± 5                                                                            | 18 ± 5                                                                              | 19 ± 5 <sup>d</sup>                                                                 |
| r(H-H), Å                                                | 0.96-1.179                                                                        | 0.9-1.08                                                                          | 1.04-1.28                                                                         | 1.04-1.28                                                                           | 1.02-1.25 <sup>d</sup>                                                              |

T1 (min) measurements were performed in <sup>a</sup> toluene-d<sub>8</sub> and <sup>b</sup> methylcyclohexane-d<sub>14</sub>. <sup>c</sup> Values were determined on a 600 MHz spectrometer and adjusted to 500 MHz field. <sup>d</sup> Calculated using methods outlined by Heinekey and Wendt.<sup>1,2</sup>

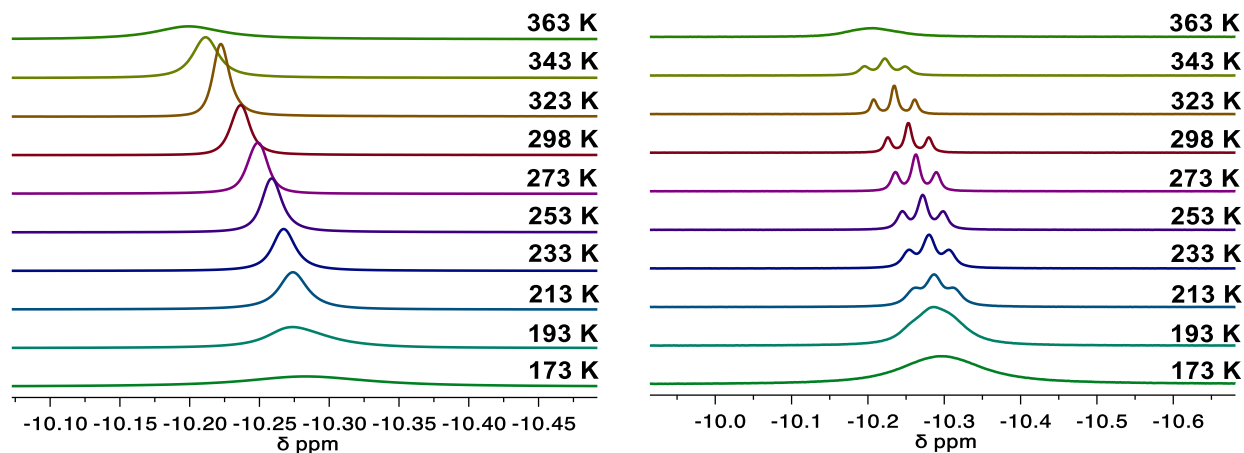

**Figure S3.** Variable temperature <sup>1</sup>H {<sup>31</sup>P} (left) and <sup>1</sup>H NMR (right) spectra (methylcyclohexane-d<sub>14</sub>, 400 MHz) of the hydridic protons of **Ir-H4**.

## NMR Data Demonstrating the Formation of Ir-H<sub>3</sub> under Vacuum

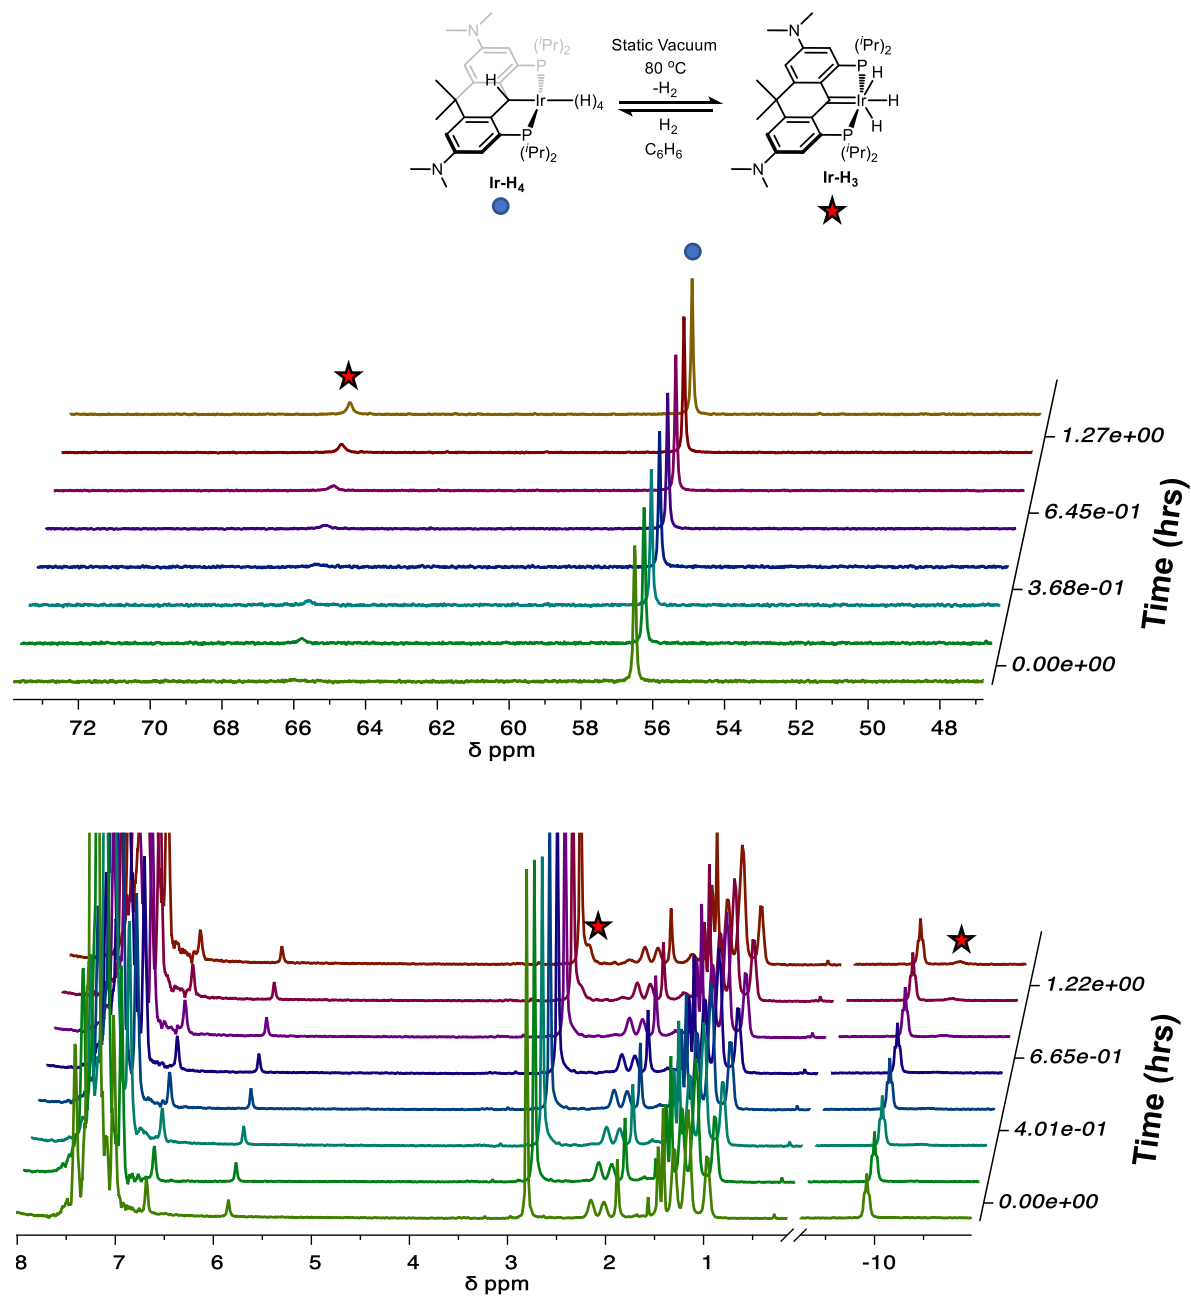

**Figure S4.** <sup>31</sup>P {<sup>1</sup>H} (162 MHz, top) and <sup>1</sup>H NMR (400 MHz, bottom) spectra of Ir-H<sub>4</sub> heated under static vacuum to 80 °C for 1.6 hours in benzene (spiked with 0.05 mL of cyclohexane-d<sub>12</sub>).

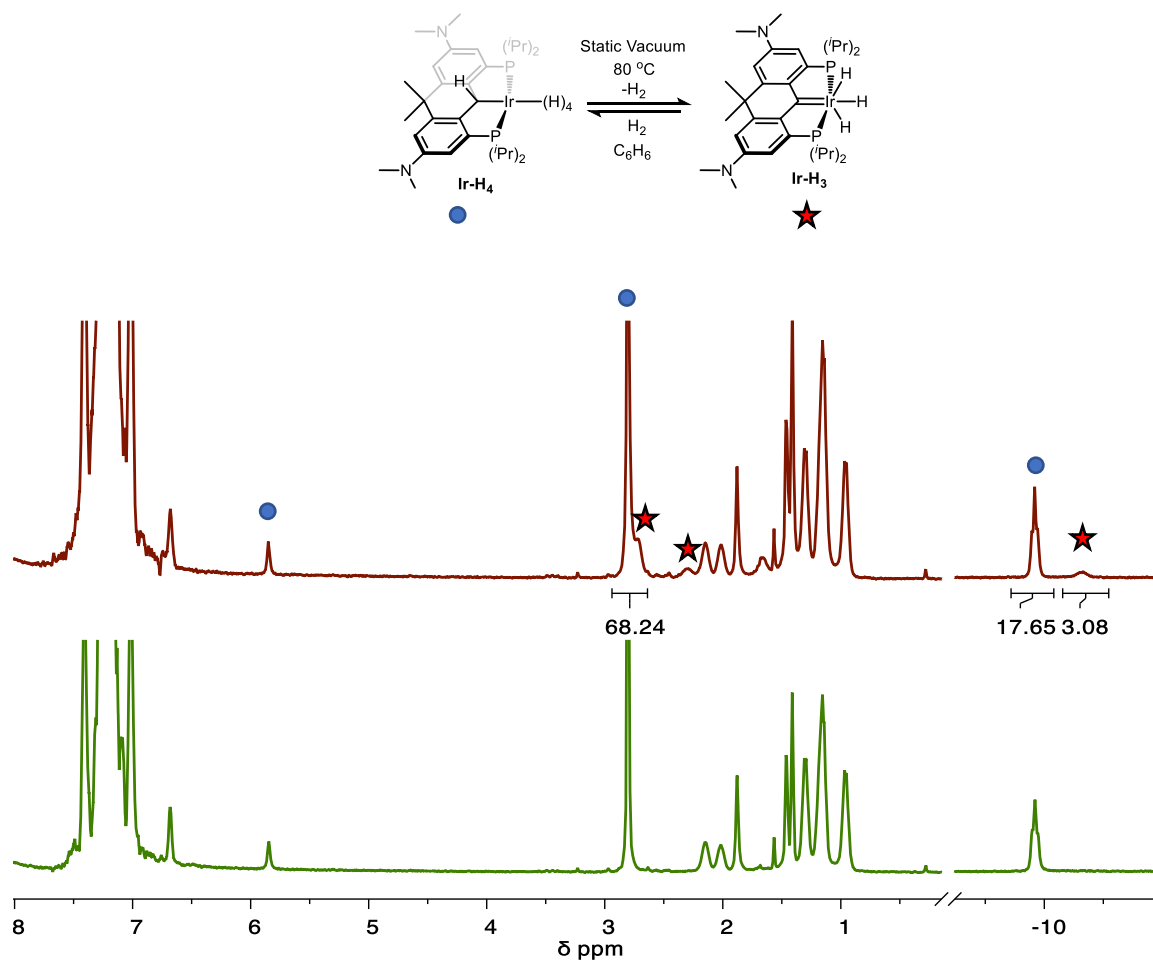

**Figure S5.** <sup>1</sup>H NMR (400 MHz) spectra of **Ir-H<sub>4</sub>** heated under static vacuum to 80 °C at 0 hrs (bottom) and 1.6 hrs (top) in benzene (spiked with 0.05 mL of cyclohexane-d<sub>12</sub>).

Relative integrations of selected peaks for **Ir-H<sub>3</sub>** show NMe<sub>2</sub> protons (2.71 ppm) and hydride protons (-10.30 ppm) have relative integrations of ~ 14 : 3 (slightly greater than 12: 3) when taking into account the overlapping NMe<sub>2</sub> from **Ir-H<sub>4</sub>** (2.81 ppm) .

## Reactions demonstrating H/D exchange within Ir-H<sub>4</sub>, Ir-Ph and Ir-H<sub>3</sub>

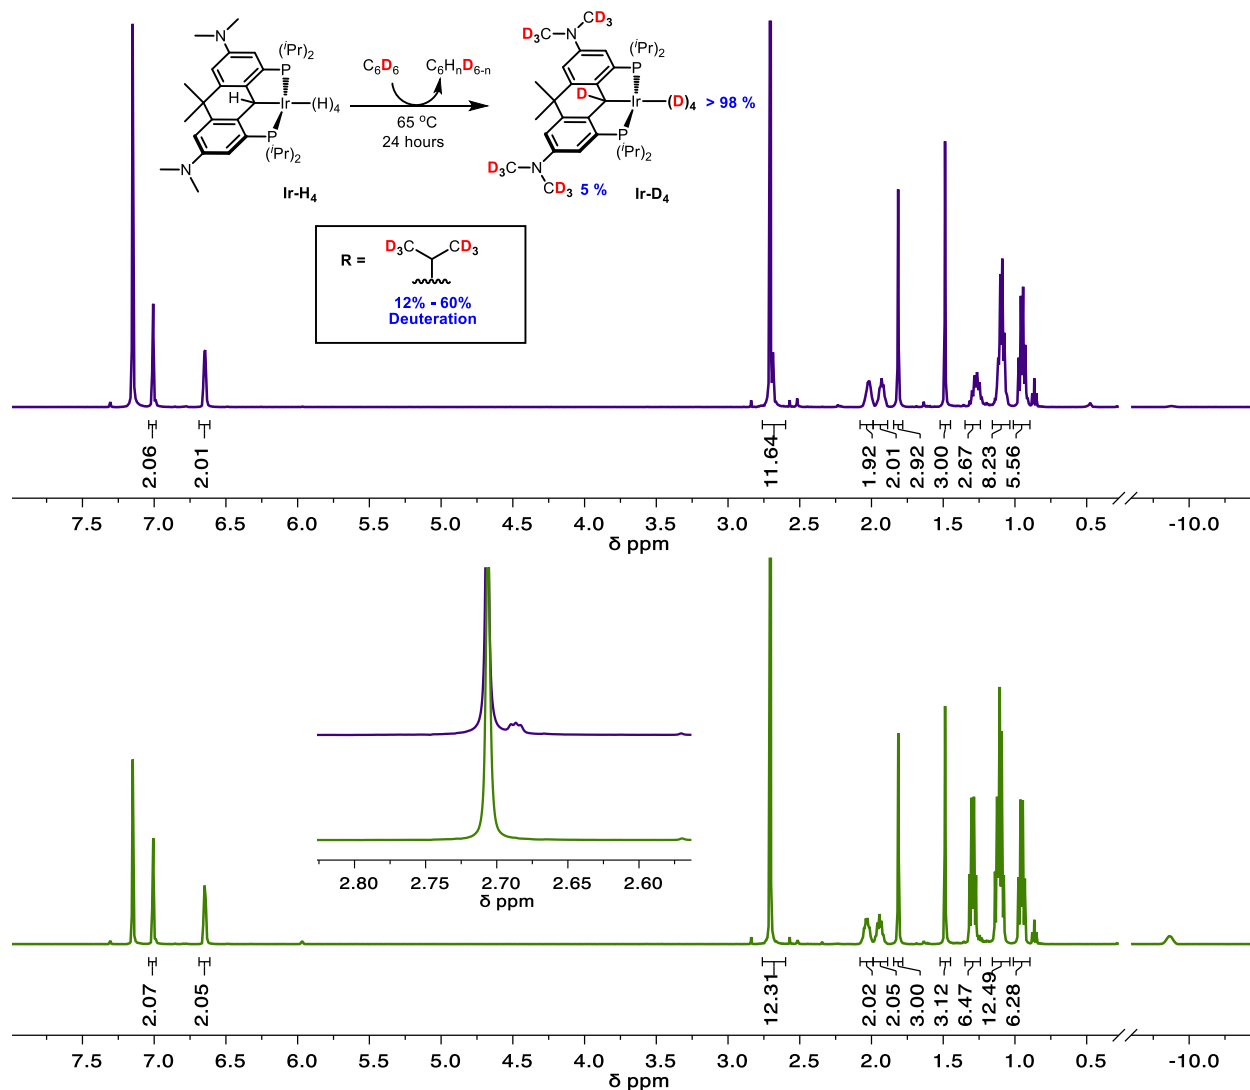

**Figure S6.**  $^1H$  NMR (500 MHz) spectra of **Ir-H<sub>4</sub>** before (bottom) and after (top) being heated to 65 °C in  $C_6D_6$  for 24 hours.

After heating **Ir-H<sub>4</sub>** for 24 hours under 1 atmosphere of argon, deuteration of the methyl groups within the  $P^iPr_2$  (1.31 ppm, 1.12 ppm and 0.96 ppm) and  $NMe_2$  (2.72 ppm) functionalities is inferred from the loss of signal intensity relative to the non-exchange  $-PCH(CH_3)_3$  (2.04 ppm and 1.96 ppm),  $-C(CH_3)_2-$  (1.82 ppm, 1.50 ppm) and aryl sites (7.02 ppm, 6.65 ppm). The increase in residual  $C_6D_5H$  signal is further indication of deuterium incorporation.

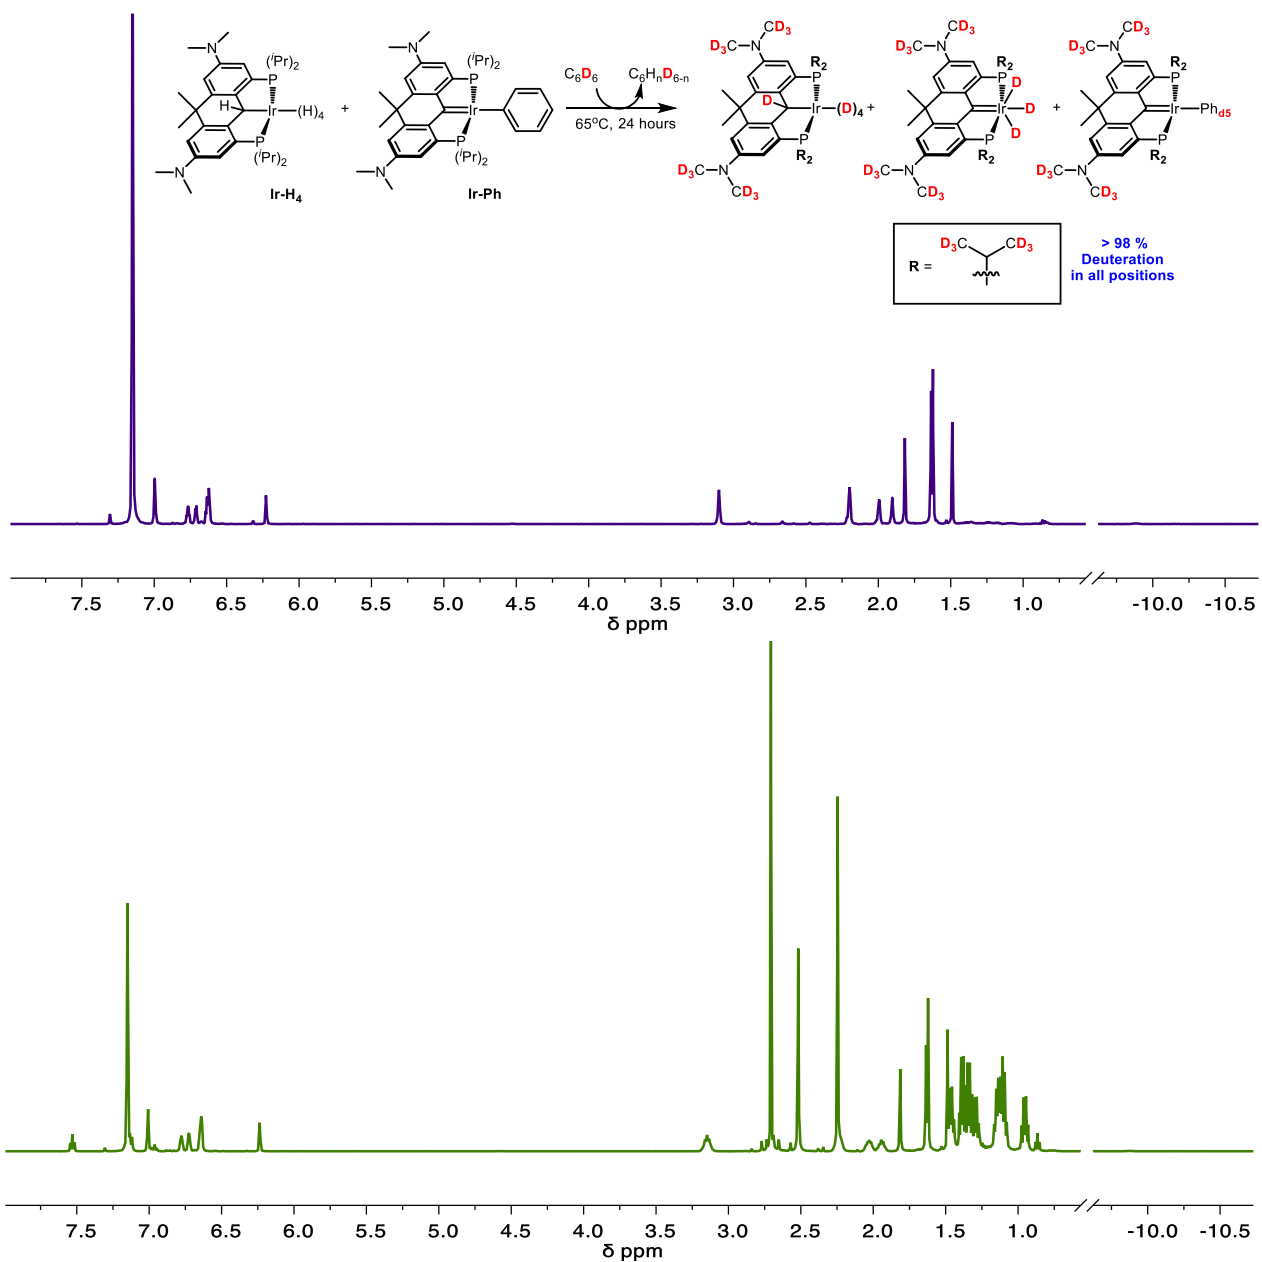

**Figure S7.**  $^1H$  NMR (500 MHz) spectra of **Ir-H<sub>4</sub>** (0.006 g, 0.008 mmol) and **Ir-Ph** (0.005 g, 0.006 mmol) before (bottom) and after (top) being heated to  $65^\circ C$  in  $C_6D_6$  for 24 hours.



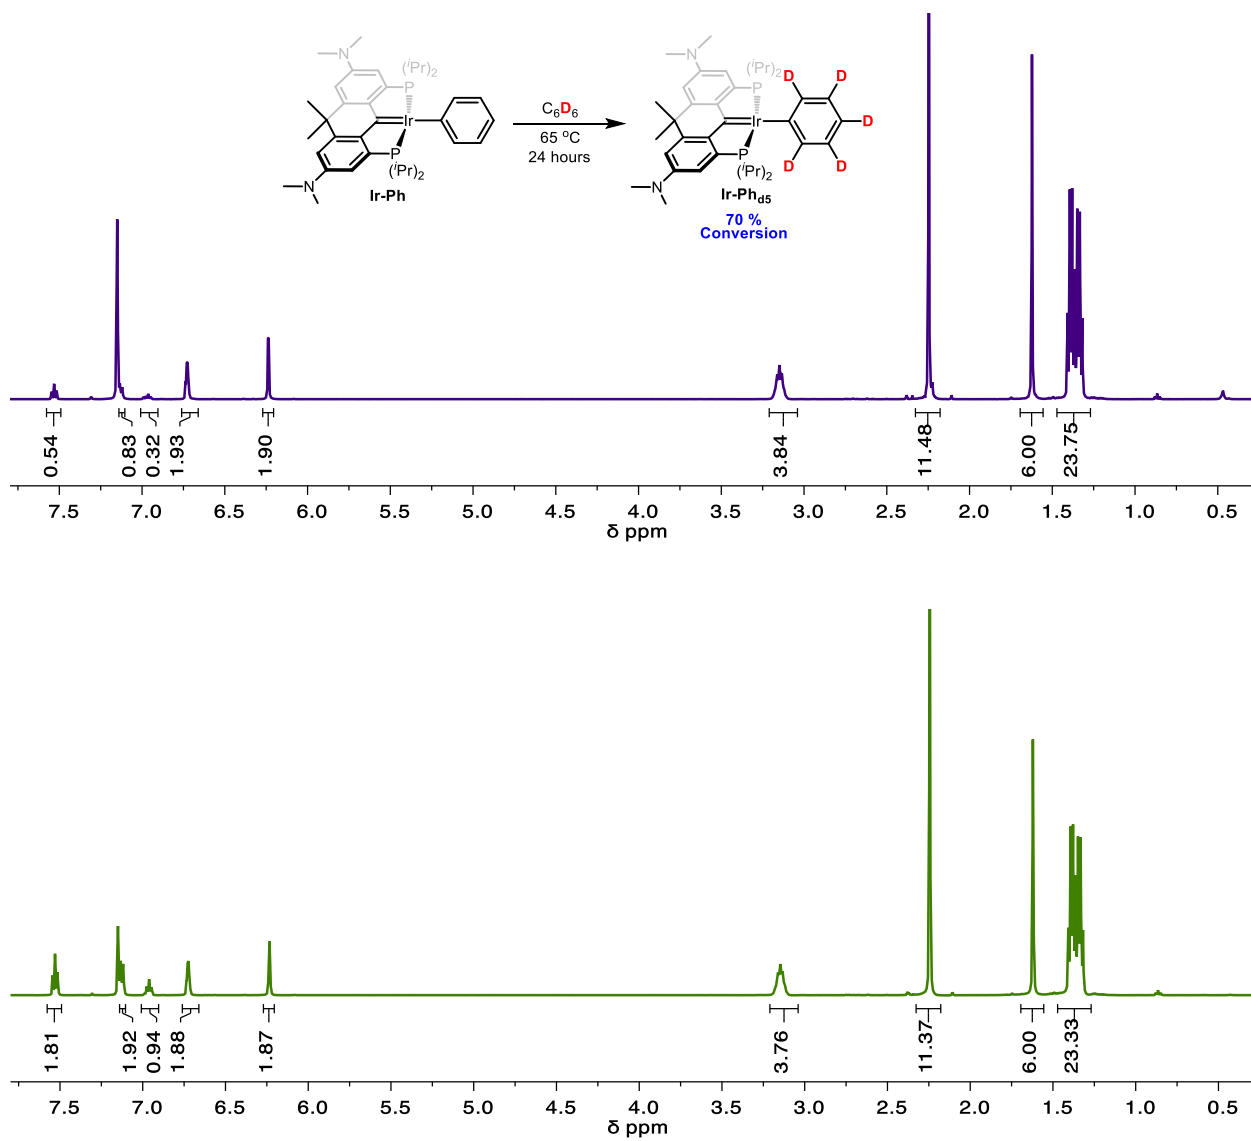

**Figure S8.**  $^1\text{H}$  NMR (500 MHz) spectra of **Ir-Ph** before (bottom) and after (top) being heated to 65 °C in  $\text{C}_6\text{D}_6$  for 24 hours.

After heating **Ir-Ph** for 24 hours under 1 atmosphere of argon, deuteration is limited to phenyl ligand (7.54 ppm, 7.14 ppm and 6.97) as indicated by a loss of more than half of resonance signal intensity relative to all other C-H sites.

## Hydrogen Isotope Exchange with D<sub>2</sub>O

**Table S2.** Optimization of conditions for deuteration of *meta*-xylene with D<sub>2</sub>O.

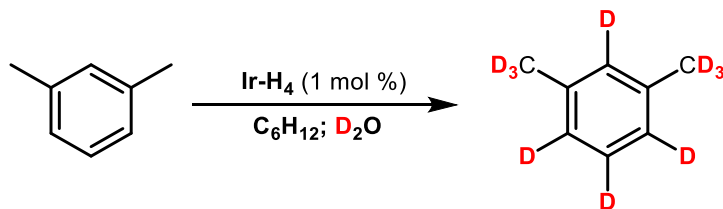

| Entry | Catalyst          | Temp. (°C)      | Position % Deuteration |   |       |    |
|-------|-------------------|-----------------|------------------------|---|-------|----|
|       |                   |                 | Benzyl                 | 2 | 4 & 6 | 5  |
| 1     | Ir-OH             | 65              | 0                      | 0 | 0     | 0  |
| 2     | Ir-H <sub>4</sub> | 65 <sup>a</sup> | 0                      | 0 | 0     | 0  |
| 3     | Ir-H <sub>4</sub> | 65              | 0                      | 0 | 4     | 85 |
| 4     | Ir-H <sub>4</sub> | 65 <sup>b</sup> | 5                      | 0 | 24    | 94 |
| 5     | Ir-H <sub>4</sub> | 80              | 2                      | 0 | 20    | 95 |
| 6     | Ir-H <sub>4</sub> | 80 <sup>b</sup> | 14                     | 0 | 35    | 84 |

Reactions were performed using D<sub>2</sub>O (0.4 mL) along with *meta*-xylene (0.38 mmol) and **Ir-H<sub>4</sub>** (1 mol %) dissolved in 0.75 mL of cyclohexane. Performed with <sup>a</sup> no D<sub>2</sub>O and in cyclohexane-d<sub>12</sub> <sup>b</sup> under static vacuum.

### Characterization Data for Ir-OH

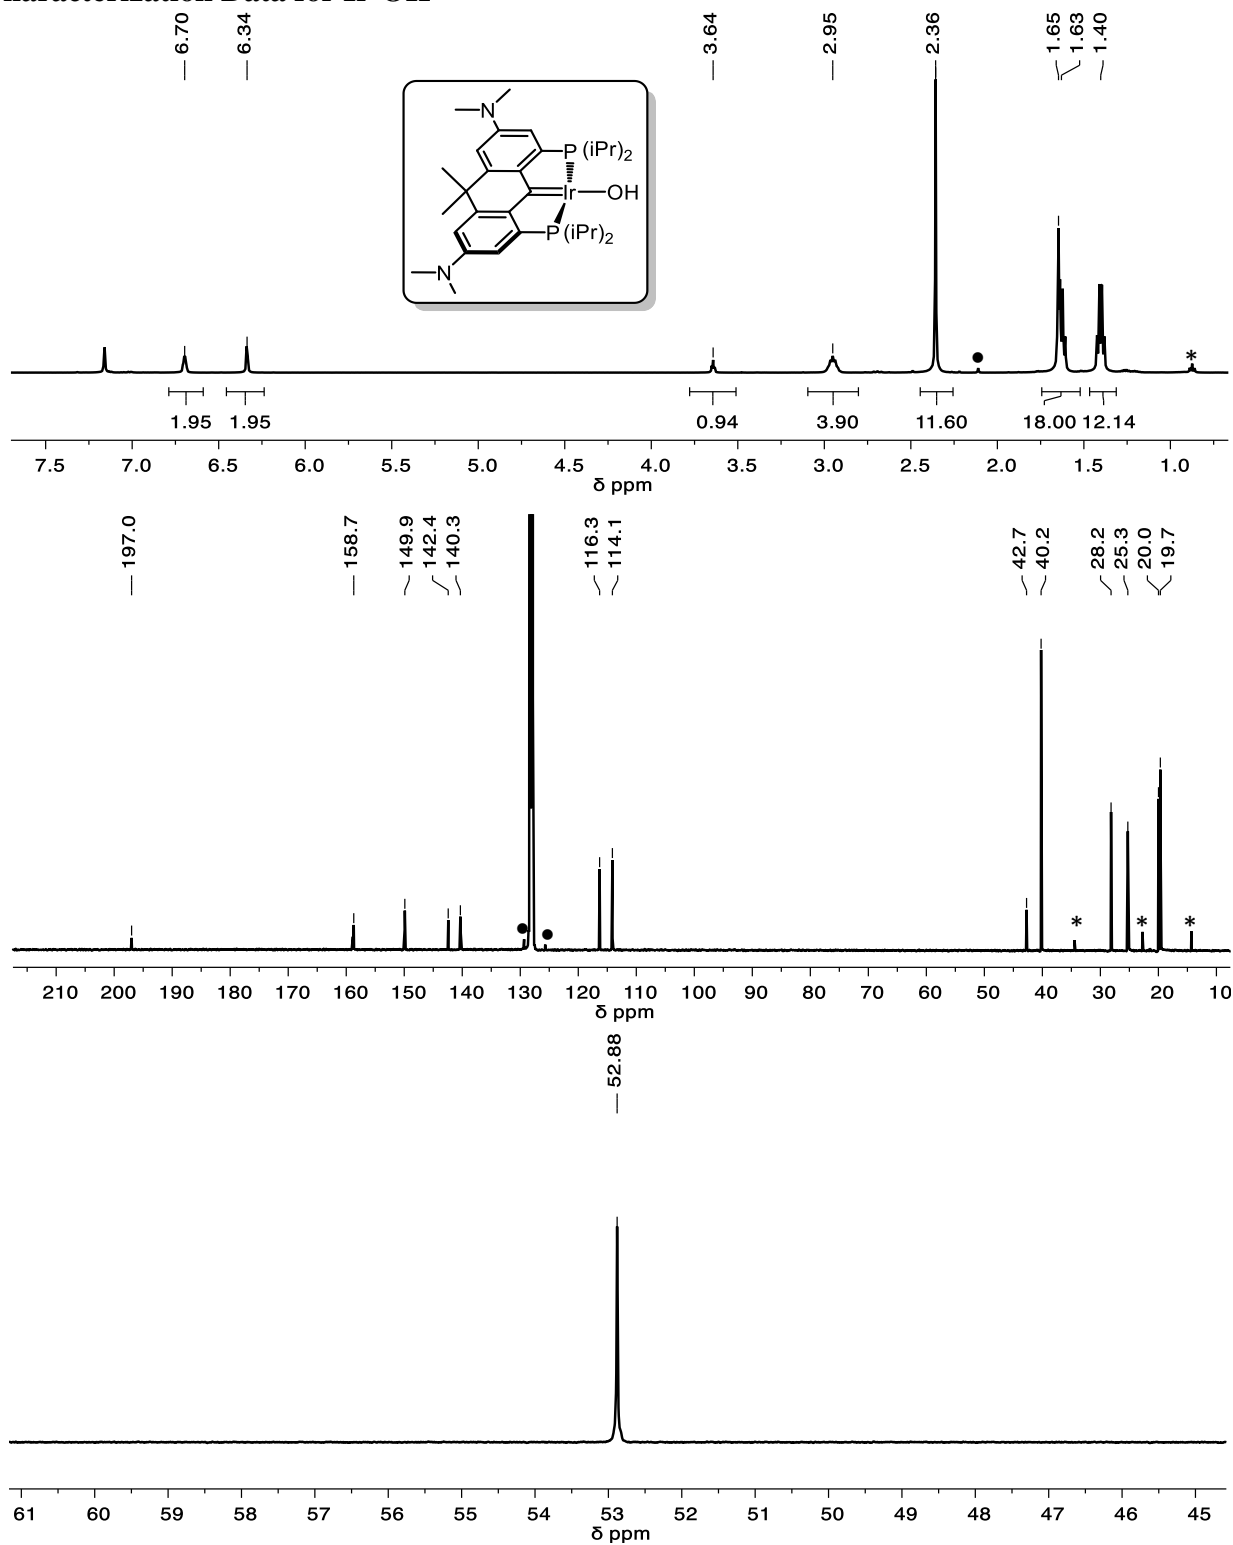

**Figure S9.** <sup>1</sup>H NMR (500 MHz, top), <sup>13</sup>C {<sup>1</sup>H} NMR (126 MHz, middle), and <sup>31</sup>P {<sup>1</sup>H} NMR (203 MHz, bottom) spectra for **Ir-OH** in C<sub>6</sub>D<sub>6</sub>. Asterisk (\*) denotes residual pentane impurity. Bullet (•) denotes toluene impurity.

### Characterization Data for Ir-H<sub>4</sub>

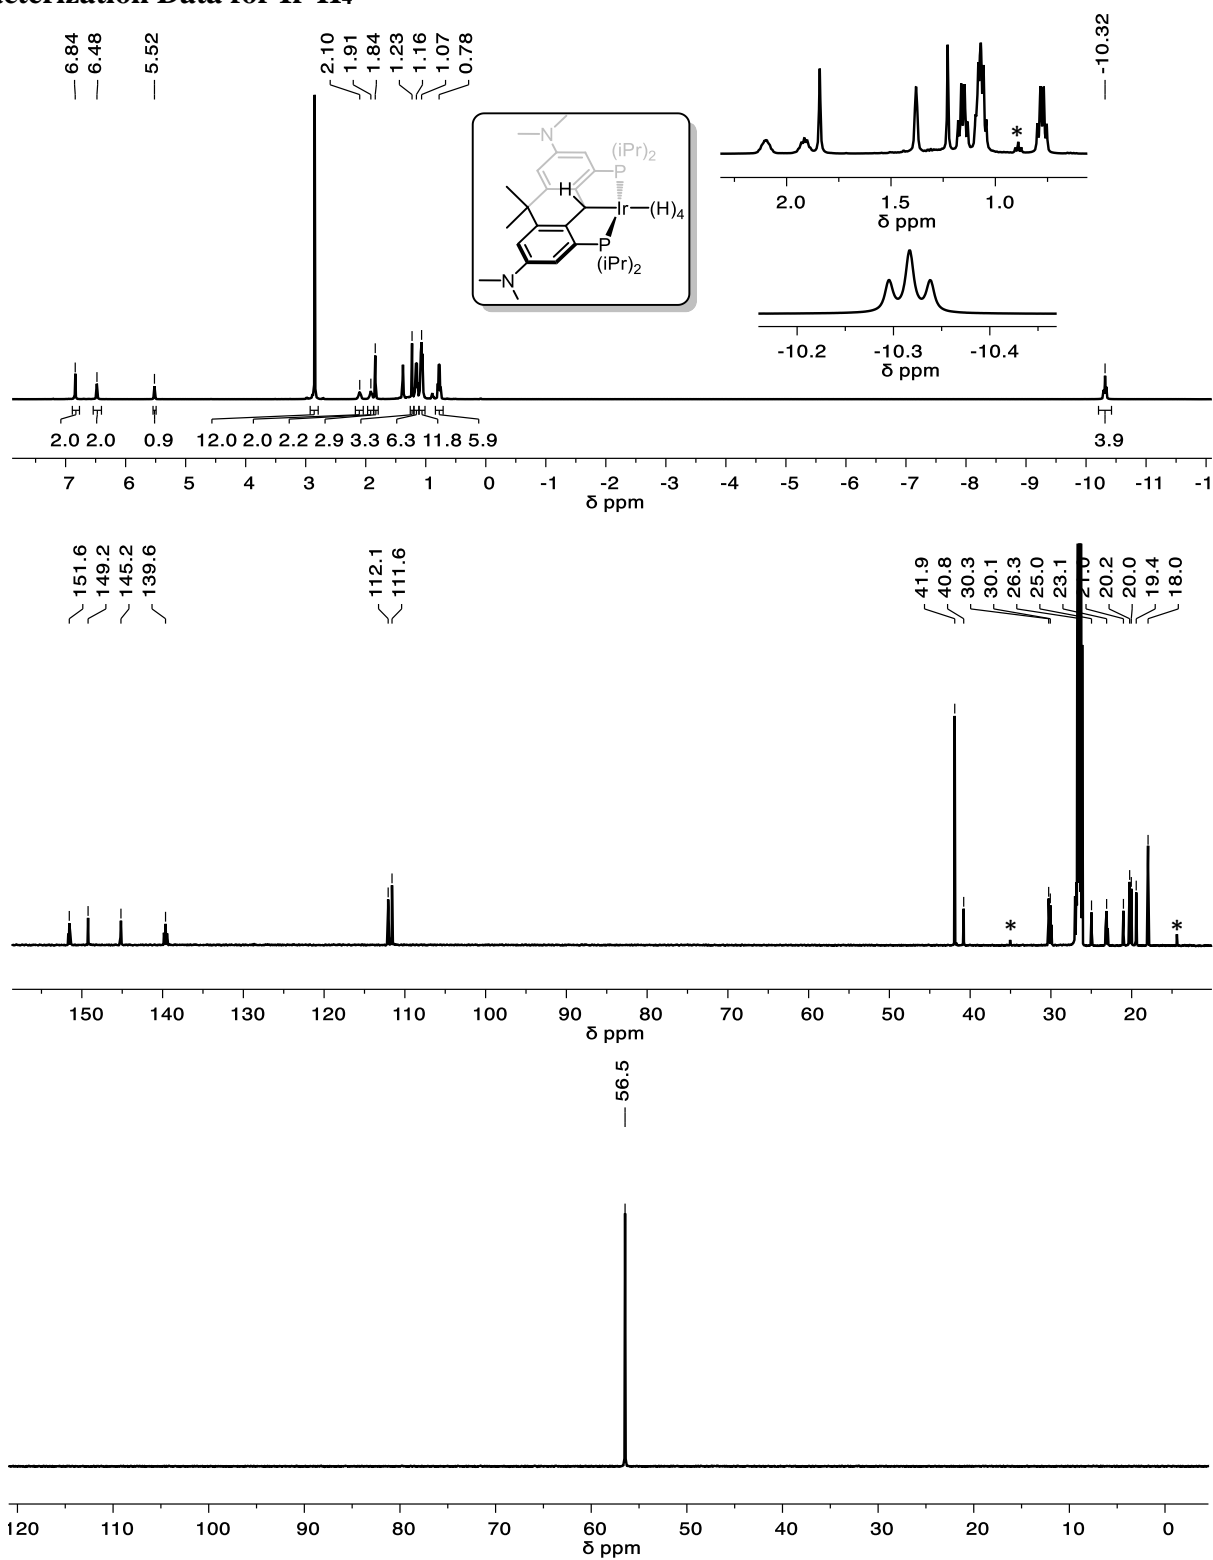

**Figure S10.** <sup>1</sup>H NMR (500 MHz, top), <sup>13</sup>C {<sup>1</sup>H} NMR (126 MHz, middle), and <sup>31</sup>P {<sup>1</sup>H} NMR (203 MHz, bottom) spectra for **Ir-H<sub>4</sub>** in C<sub>6</sub>D<sub>12</sub>. Asterisk (\*) denotes residual pentane impurity.

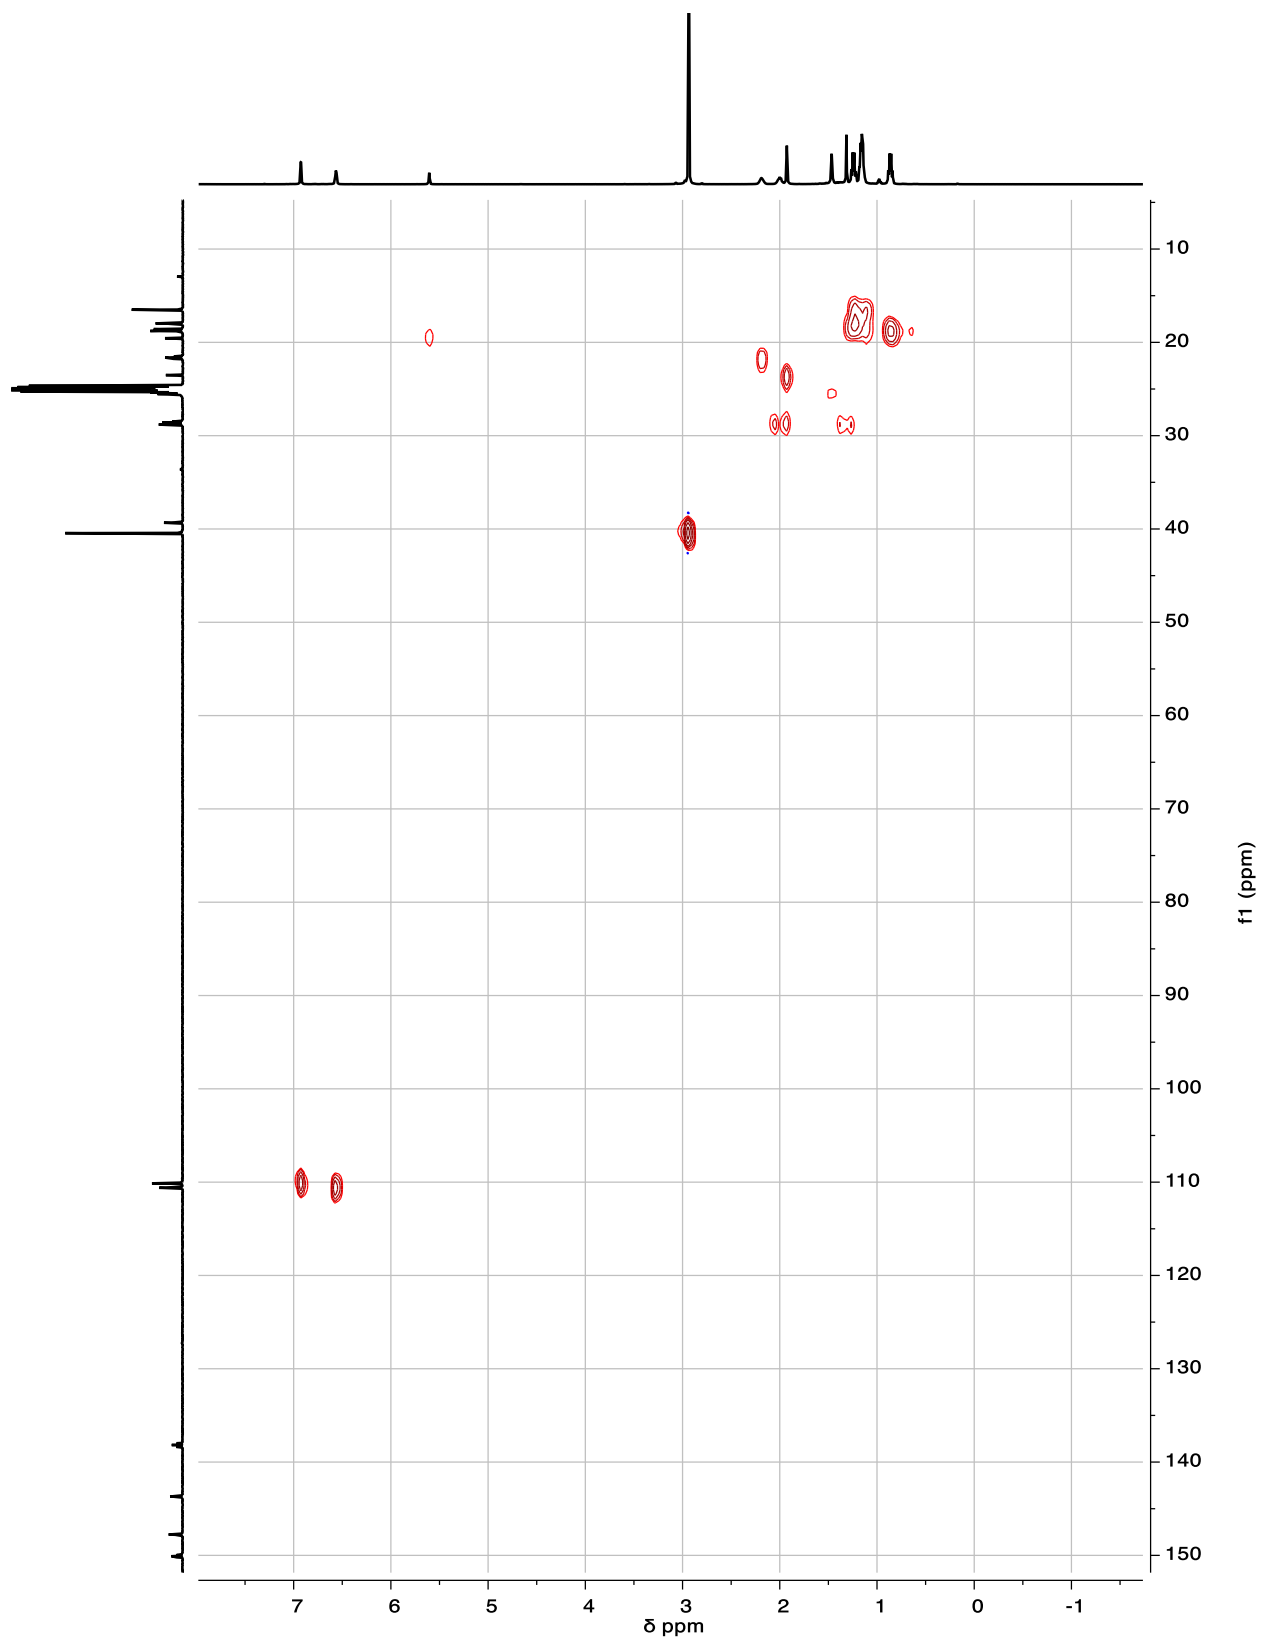

**Figure S11.**  $^1\text{H}$ - $^{13}\text{C}$  HSQC data for Ir-H4.

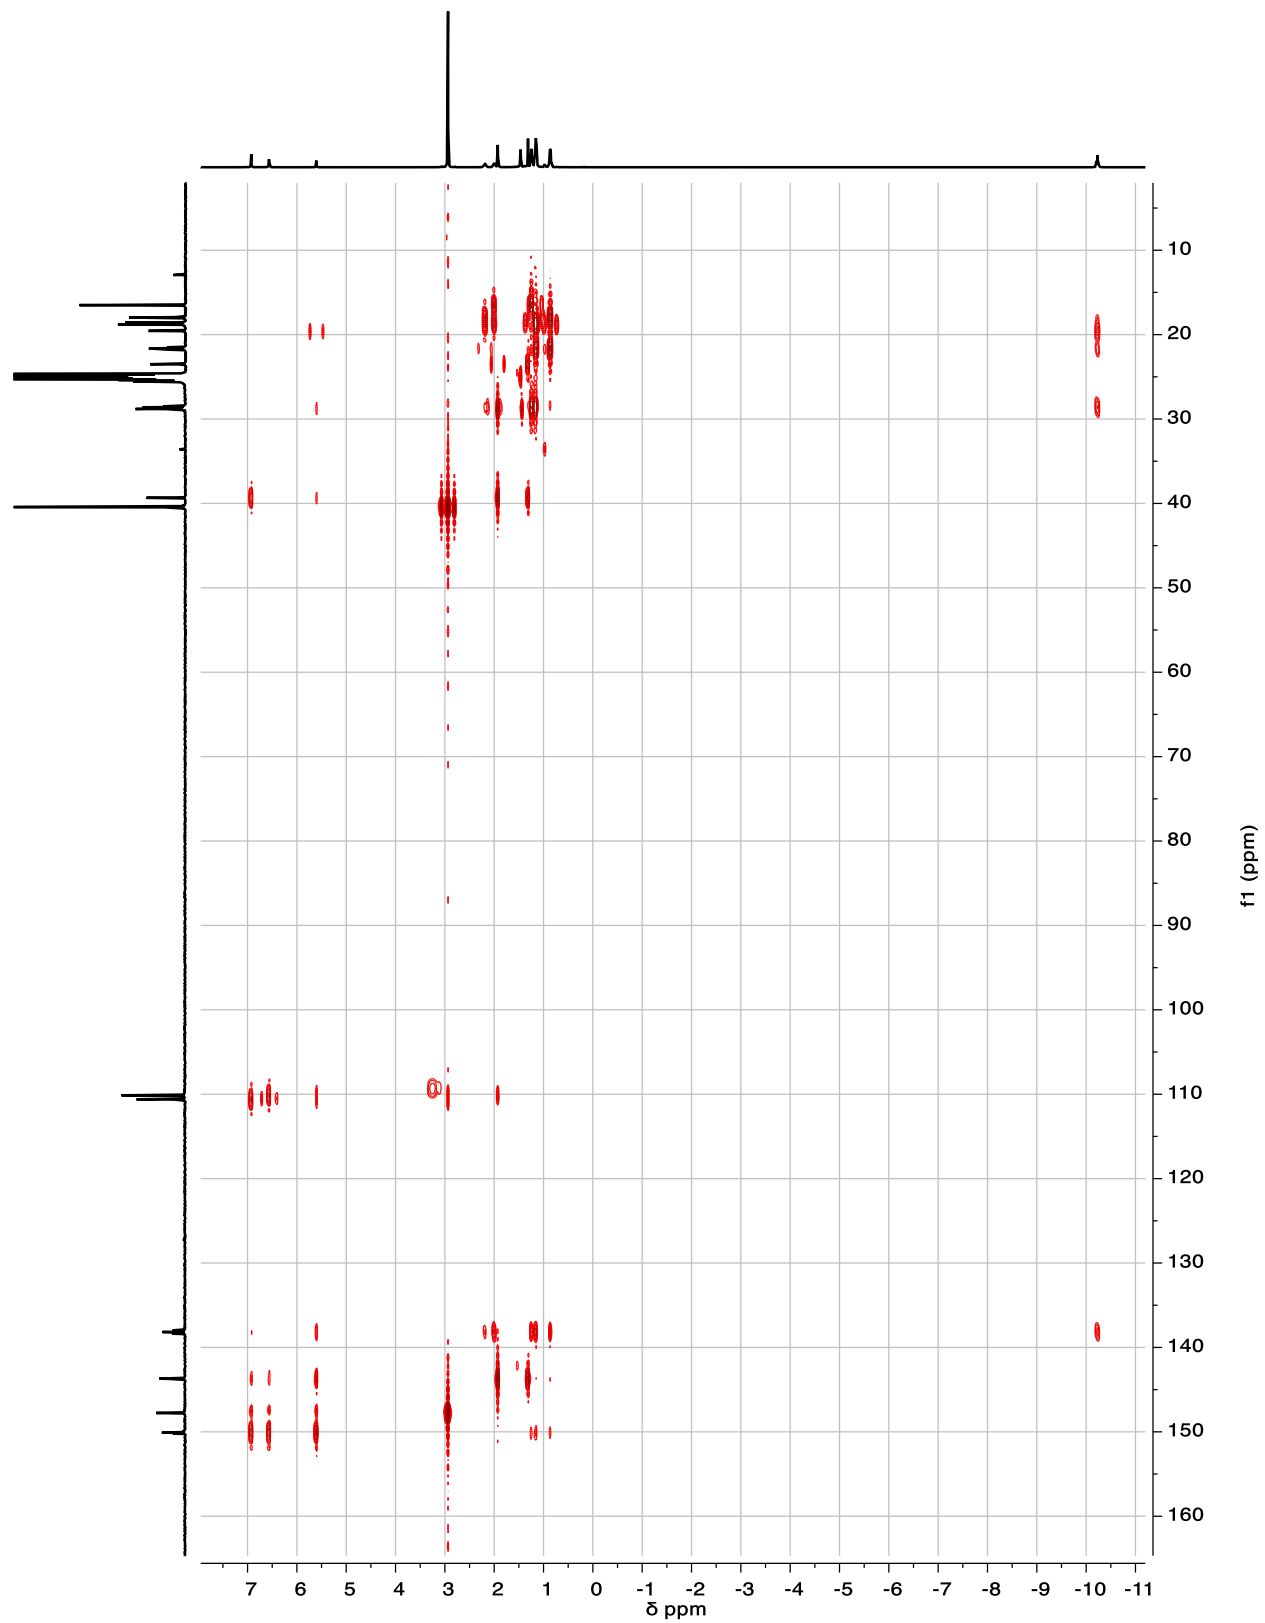

**Figure S12.**  $^1\text{H}$ - $^{13}\text{C}$  HMBC data for **Ir-H4**.

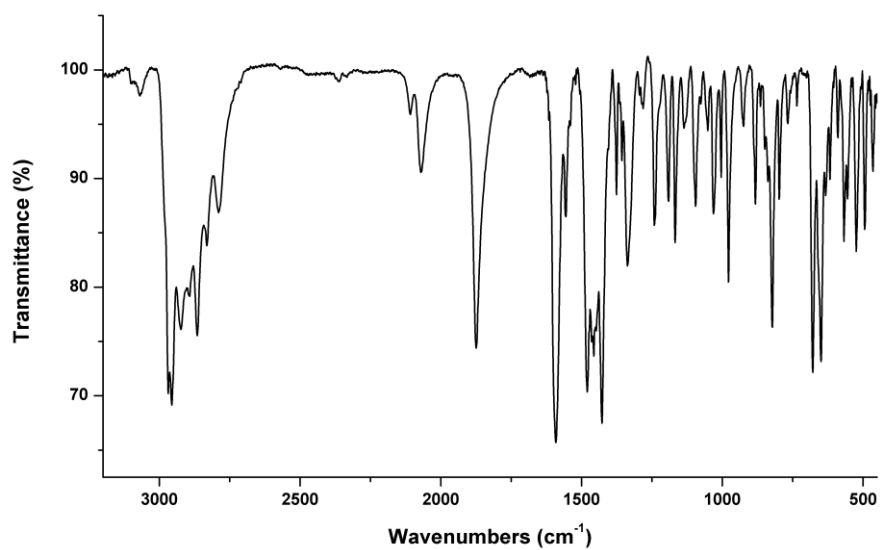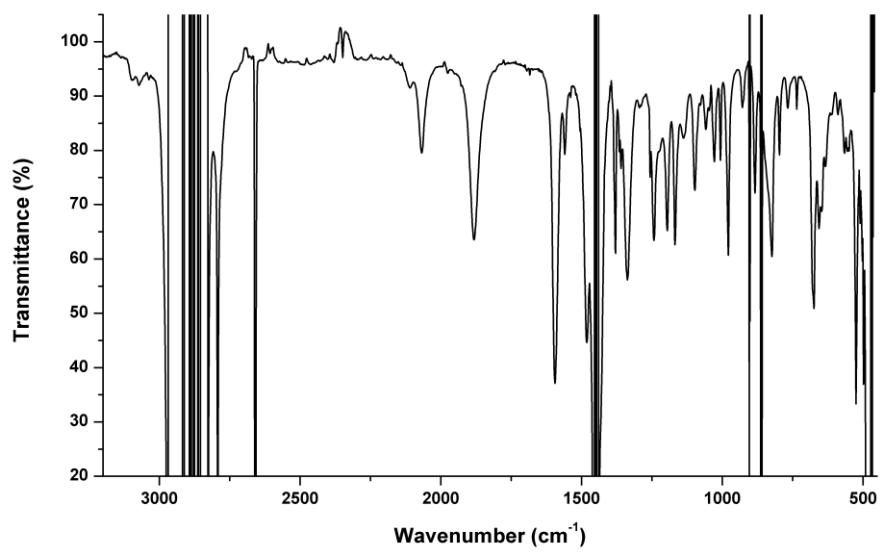

**Figure S13.** Infrared spectra of **Ir-H<sub>4</sub>** in KBr (top) and in cyclohexane (bottom).

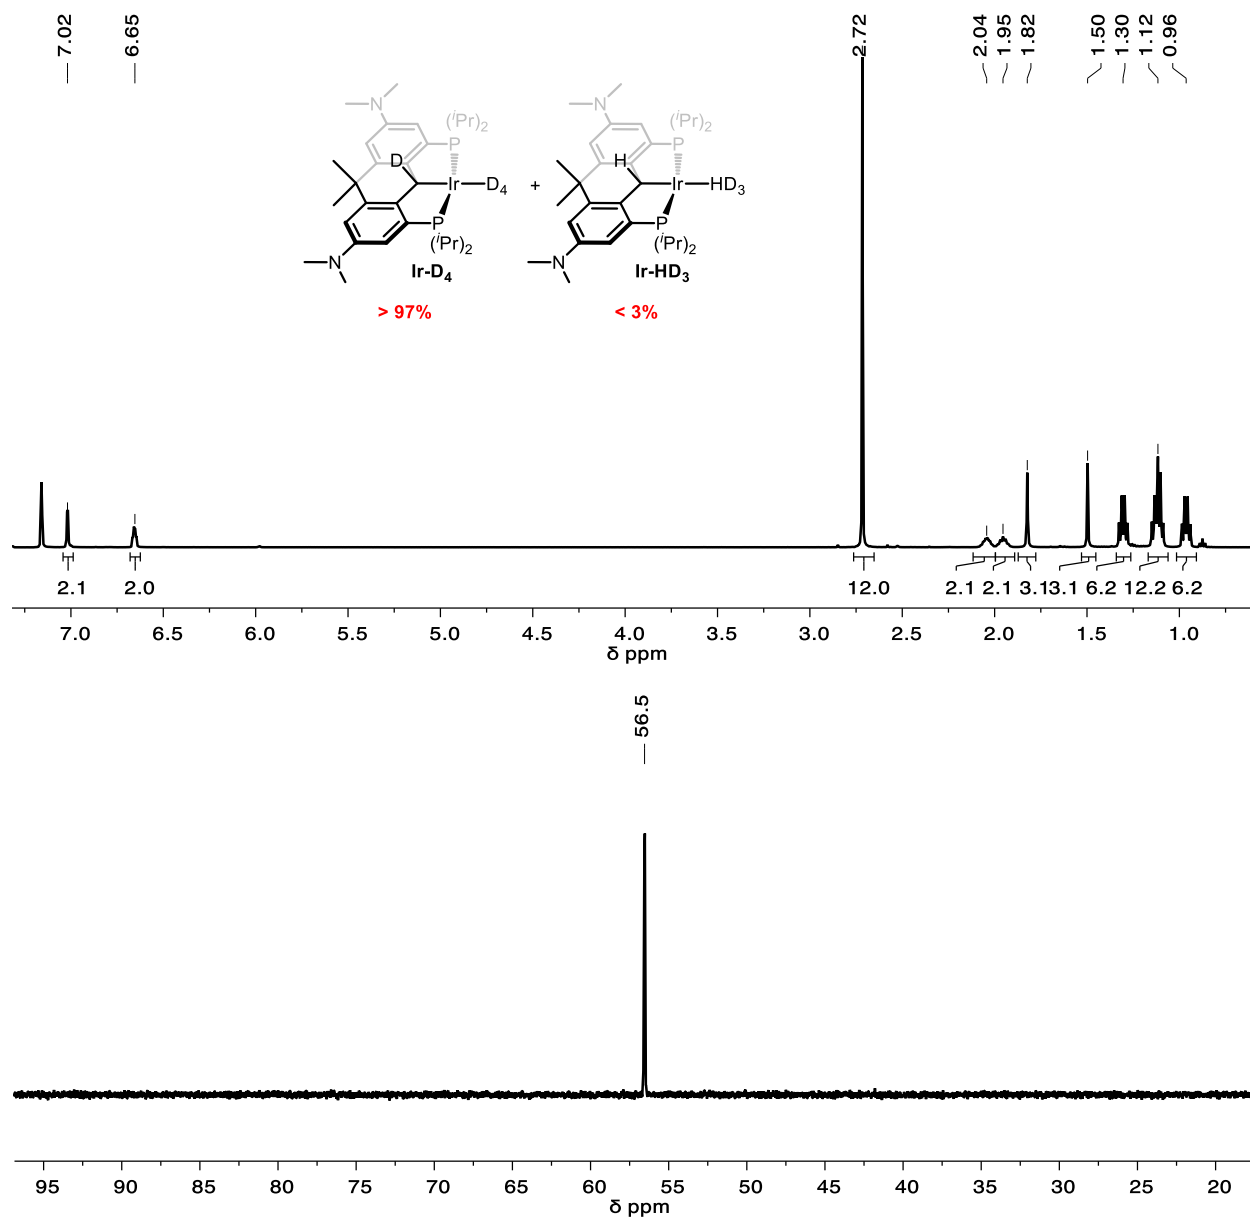

**Figure S14.** <sup>1</sup>H (500 MHz, top) and <sup>31</sup>P{<sup>1</sup>H} (203 MHz, bottom) NMR spectra for a mixture of **Ir-D<sub>4</sub>** (> 97 %) and **Ir-HD<sub>3</sub>** (< 3%) in C<sub>6</sub>D<sub>6</sub>.



### Characterization Data for Ir-Ph

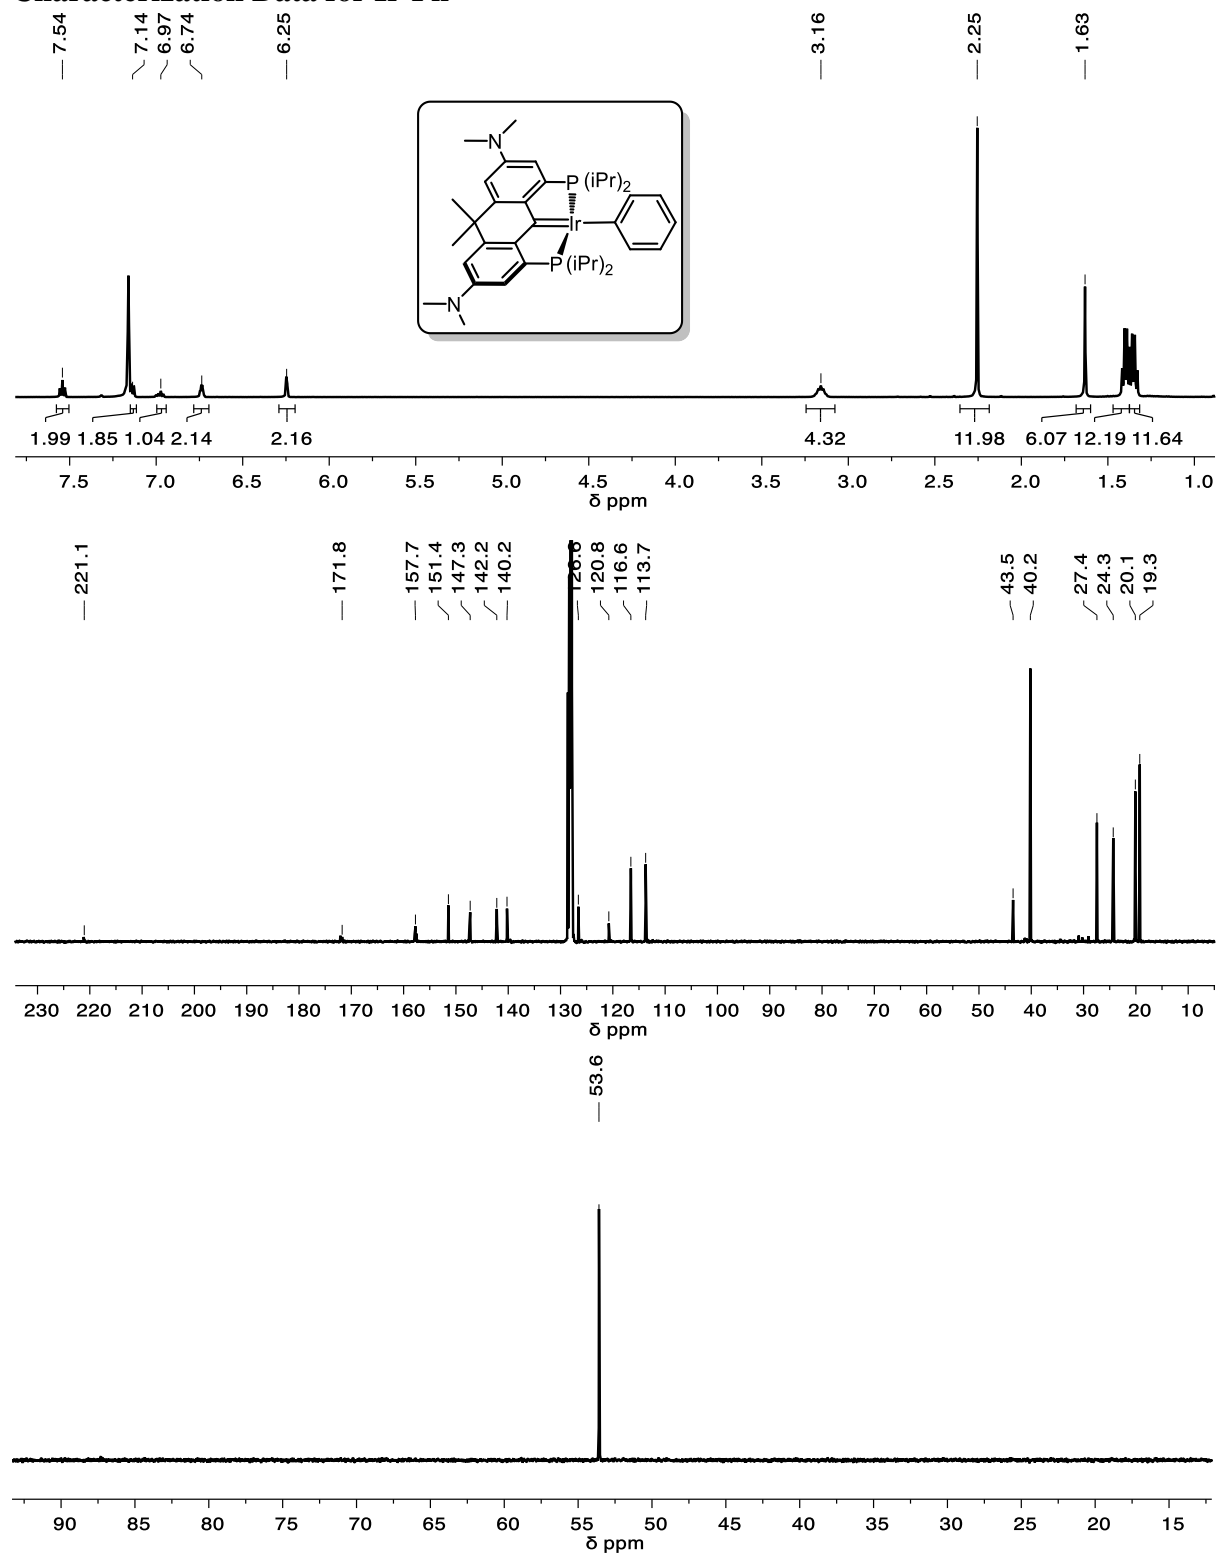

**Figure S15.**  $^1H$  NMR (500 MHz, top),  $^{13}C$   $\{^1H\}$  NMR (126 MHz, middle), and  $^{31}P$   $\{^1H\}$  NMR (203 MHz, bottom) spectra for **Ir-Ph** in  $C_6D_6$ .

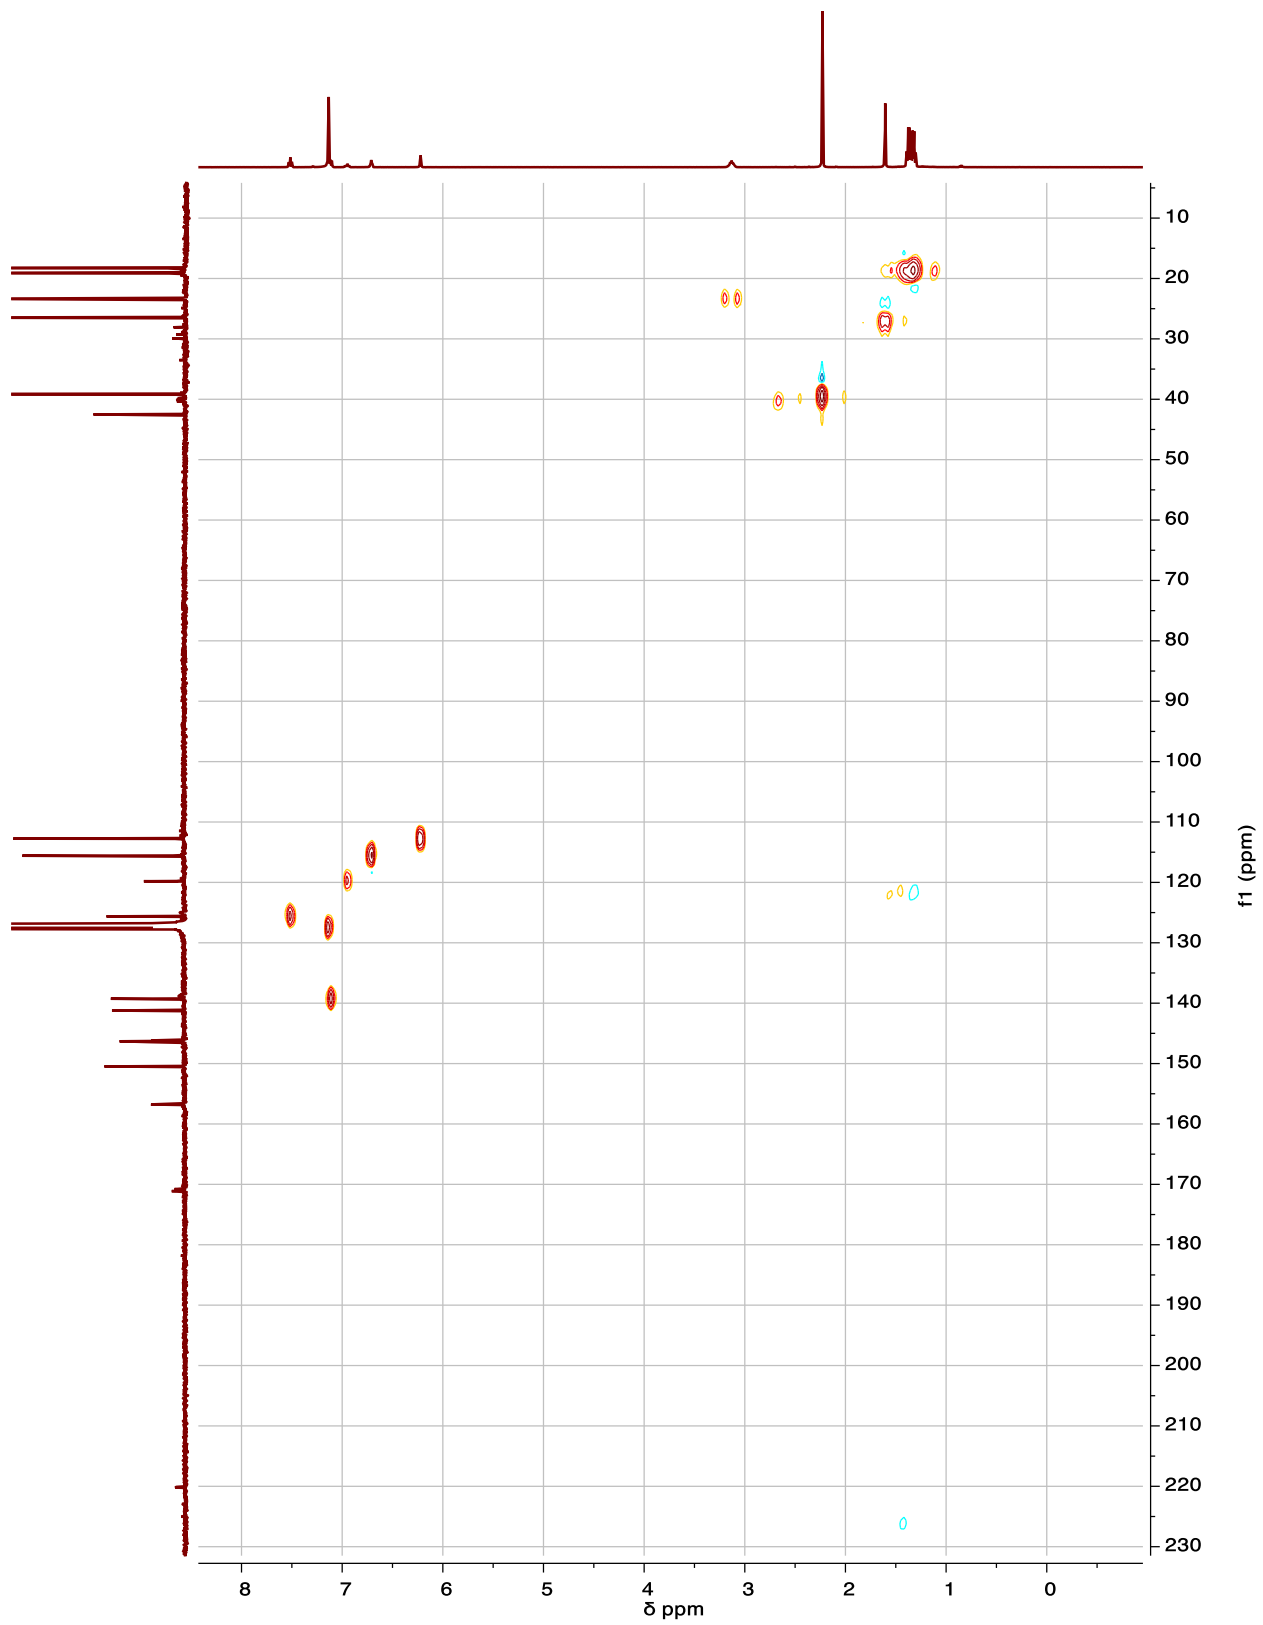

Figure S16.  $^1\text{H}$ - $^{13}\text{C}$  HSQC data for Ir-Ph.

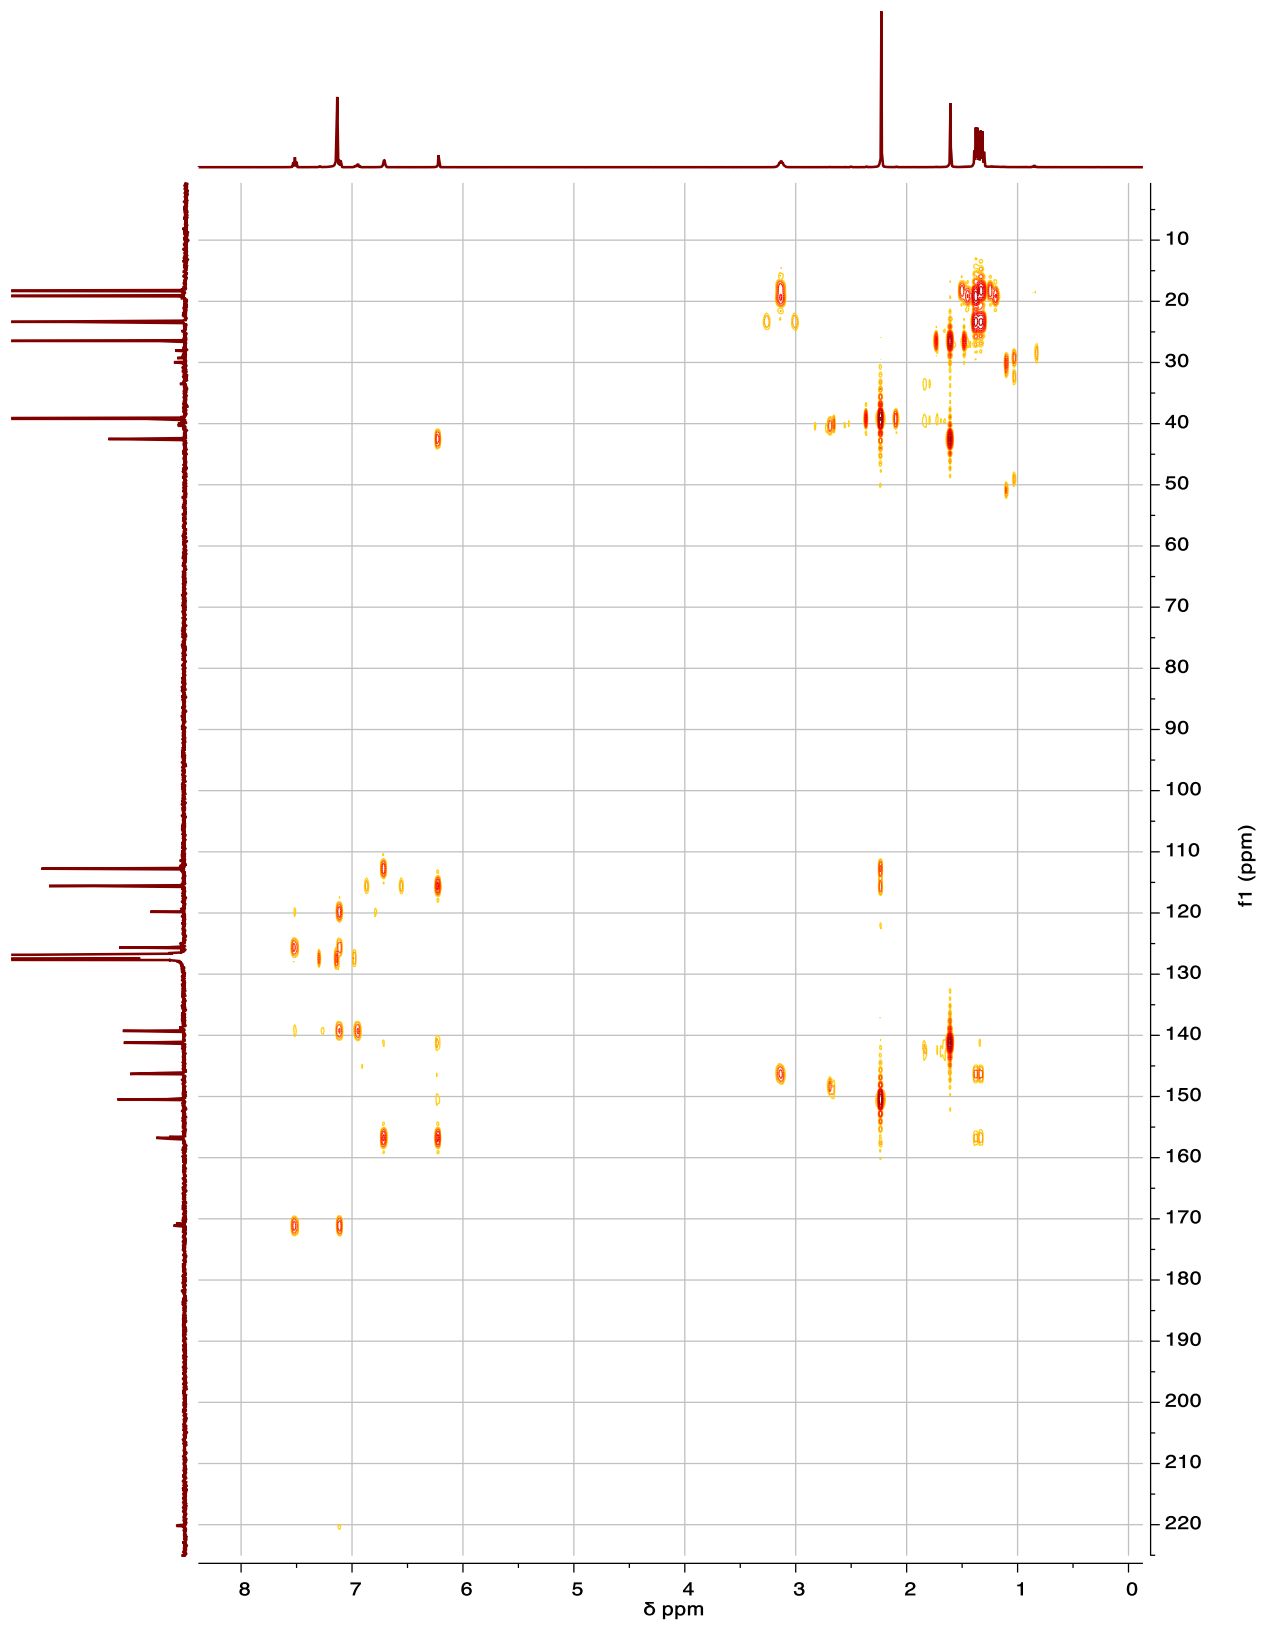

**Figure S17.**  $^1\text{H}$ - $^{13}\text{C}$  HMBC data for **Ir-Ph**.

### Characterization Data for Ir-H<sub>3</sub>

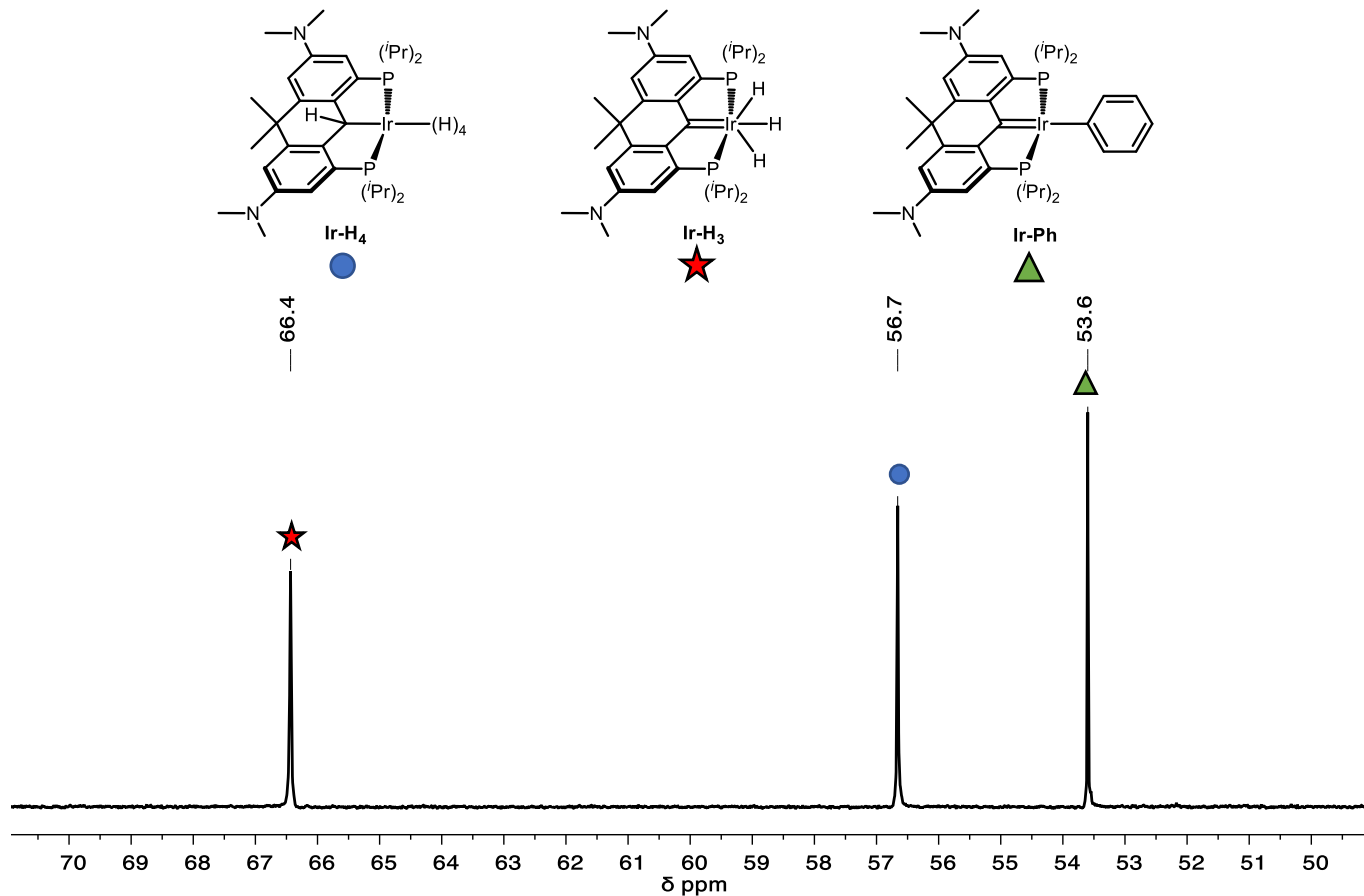

**Figure S18.** <sup>31</sup>P {<sup>1</sup>H} NMR (203 MHz) resulting from a mixture of **Ir-H<sub>4</sub>** and **Ir-Ph** in C<sub>6</sub>H<sub>6</sub> spiked with C<sub>6</sub>D<sub>12</sub> for locking and shimming.

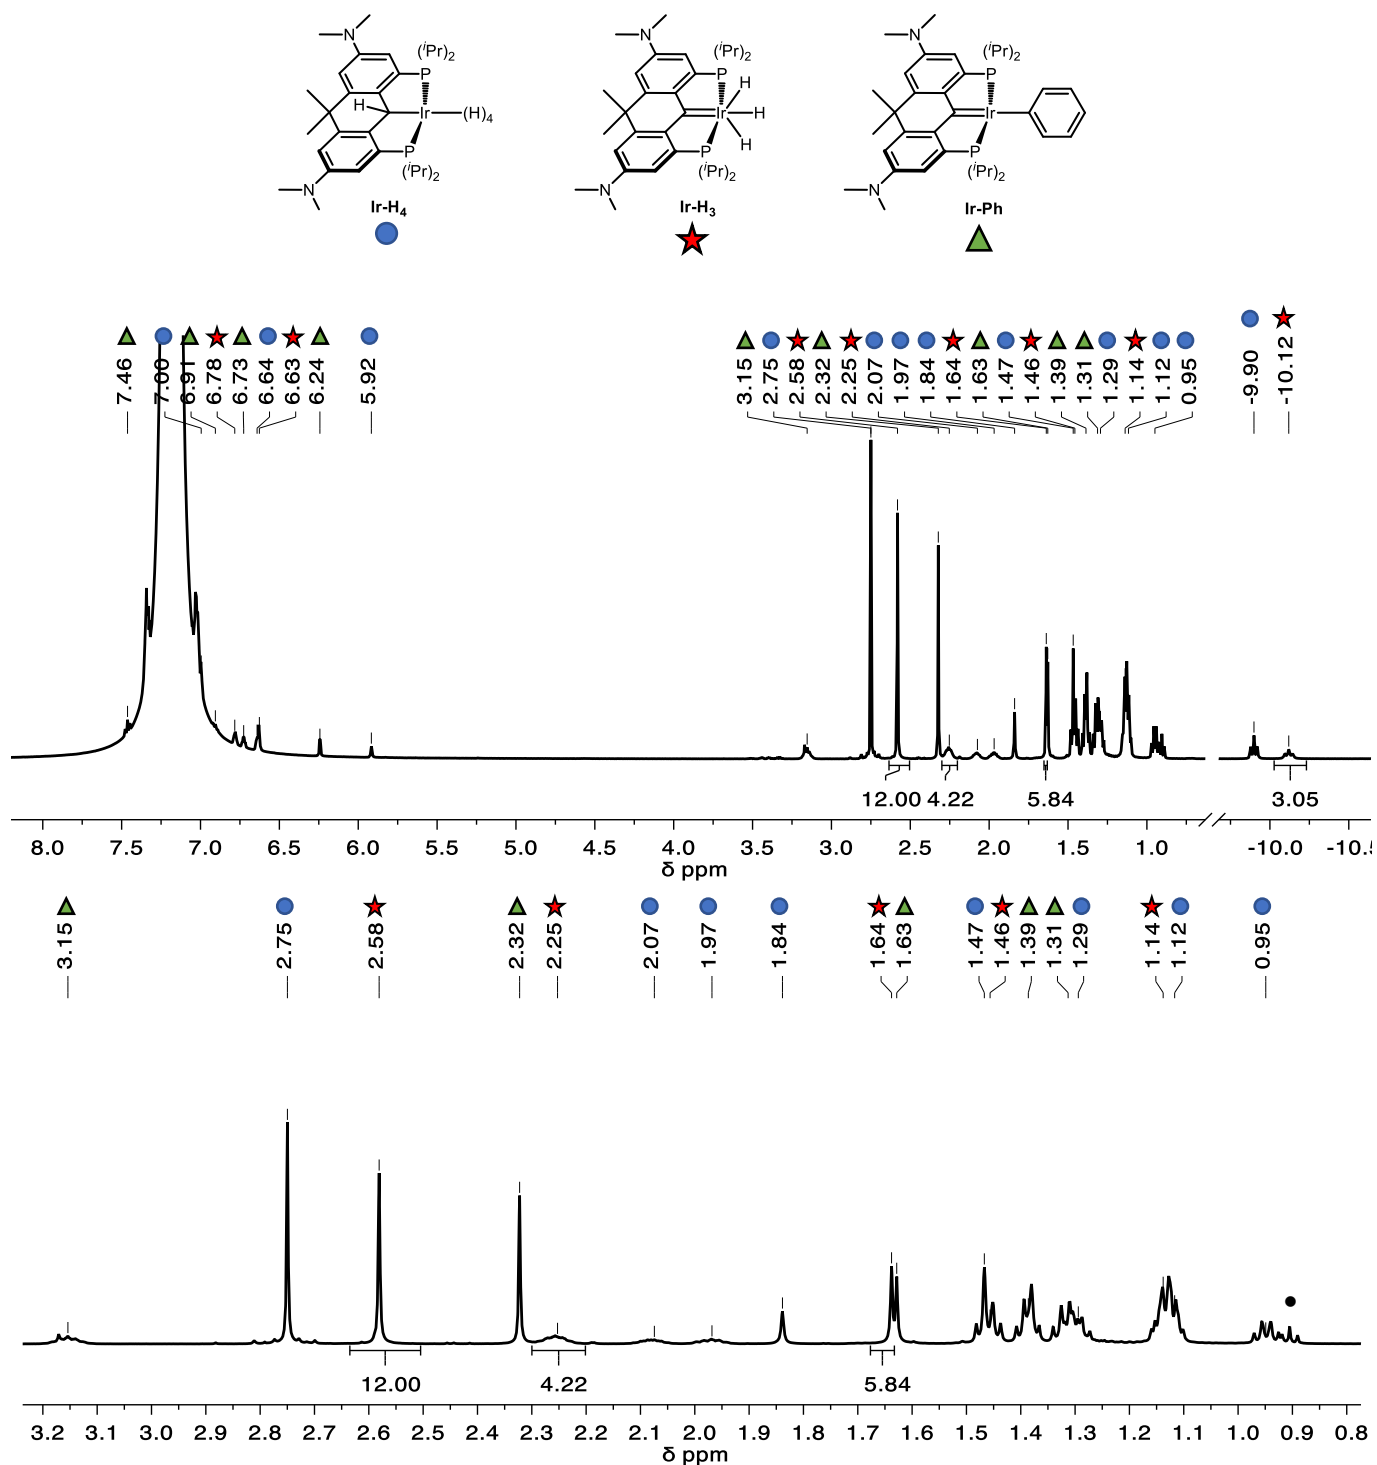

**Figure S19.**  $^1\text{H}$  NMR (500 MHz) resulting from a mixture of **Ir-H<sub>4</sub>** and **Ir-Ph** in  $\text{C}_6\text{H}_6$  spiked with  $\text{C}_6\text{D}_{12}$  for locking and shimming. Integration -C(CH<sub>3</sub>)<sub>2</sub>- protons at 1.64 ppm is underestimated due to peak overlap. Bullet(●) indicates pentane impurity.

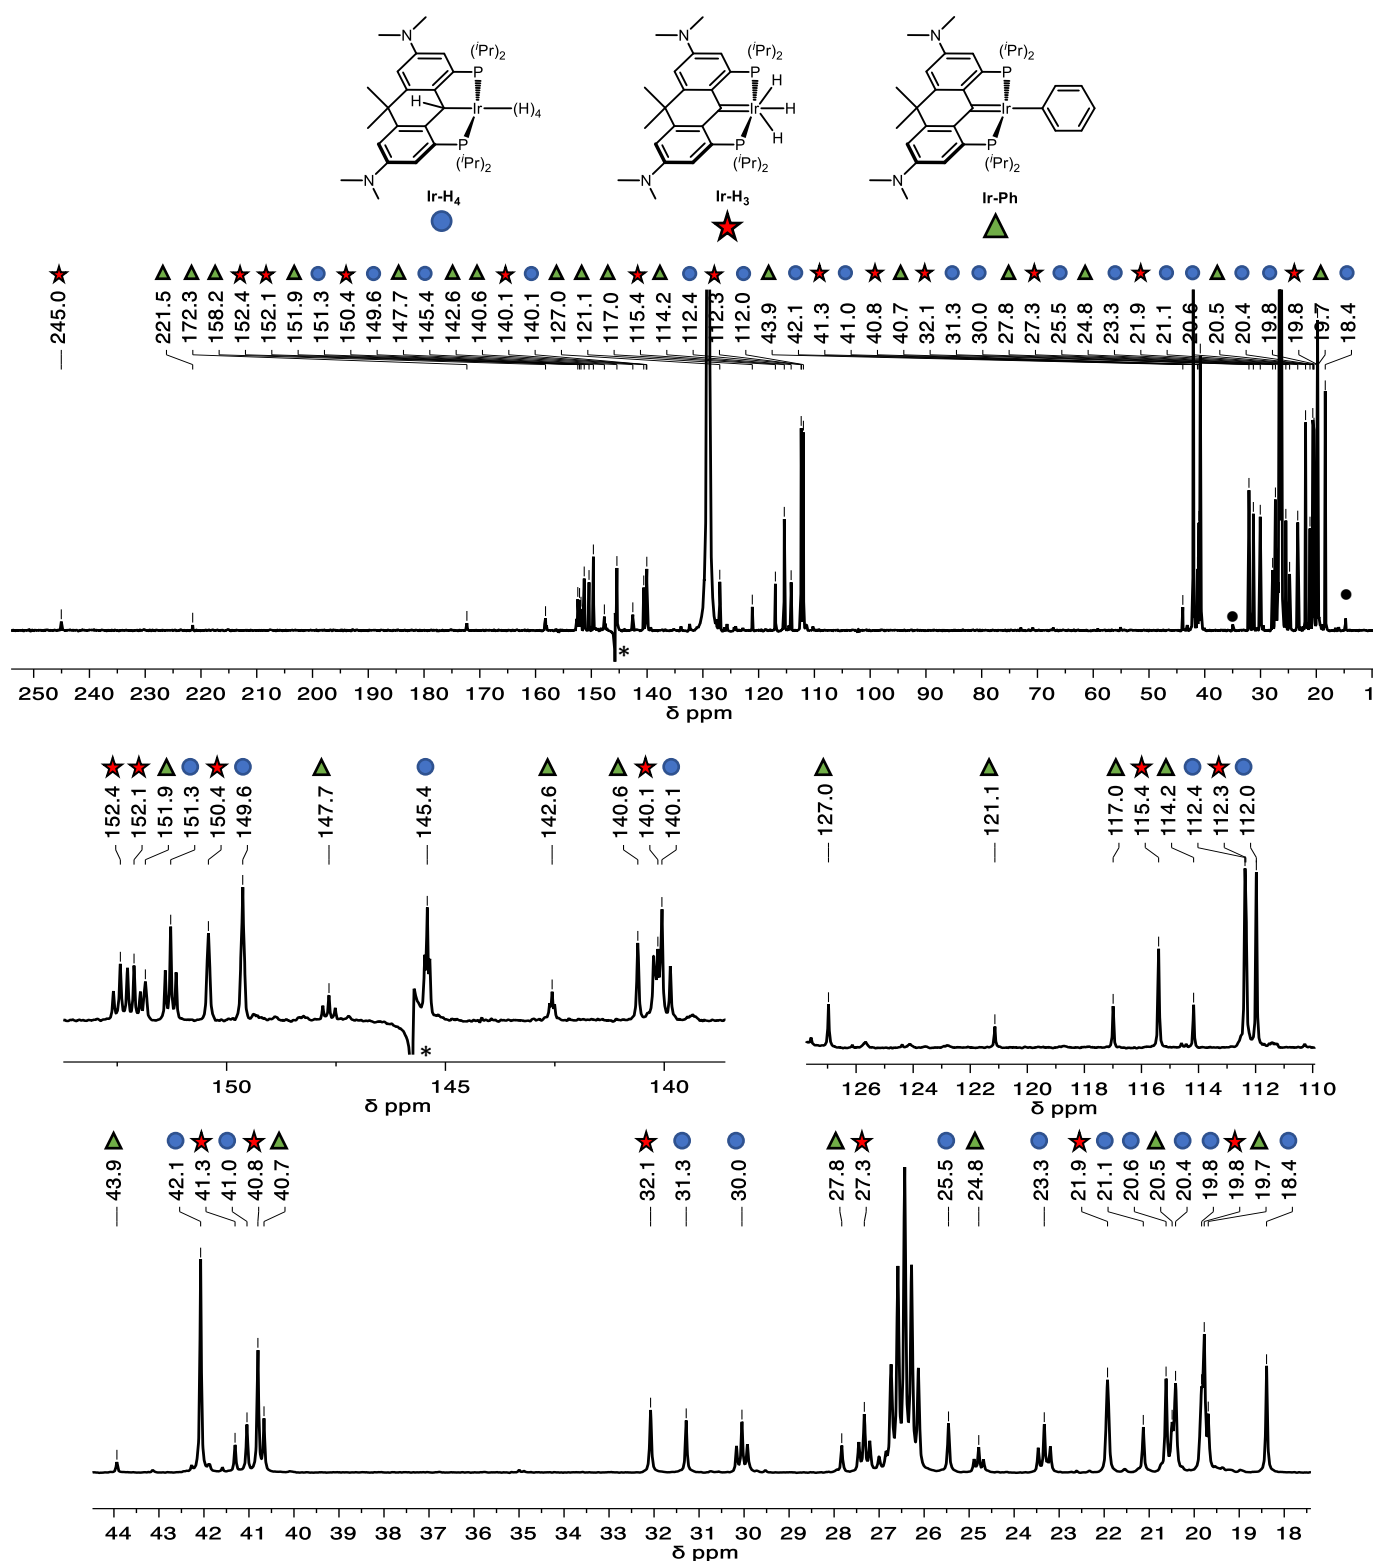

**Figure S20.**  $^{13}\text{C} \{^1\text{H}\}$  (126 MHz) resulting from a mixture of **Ir-H<sub>4</sub>** and **Ir-Ph** in  $\text{C}_6\text{H}_6$  spiked with  $\text{C}_6\text{D}_{12}$  for locking and shimming. Asterisk (\*) indicates NMR “clipping” at the centre of the spectral window. Bullet (●) indicates n-pentane impurity.

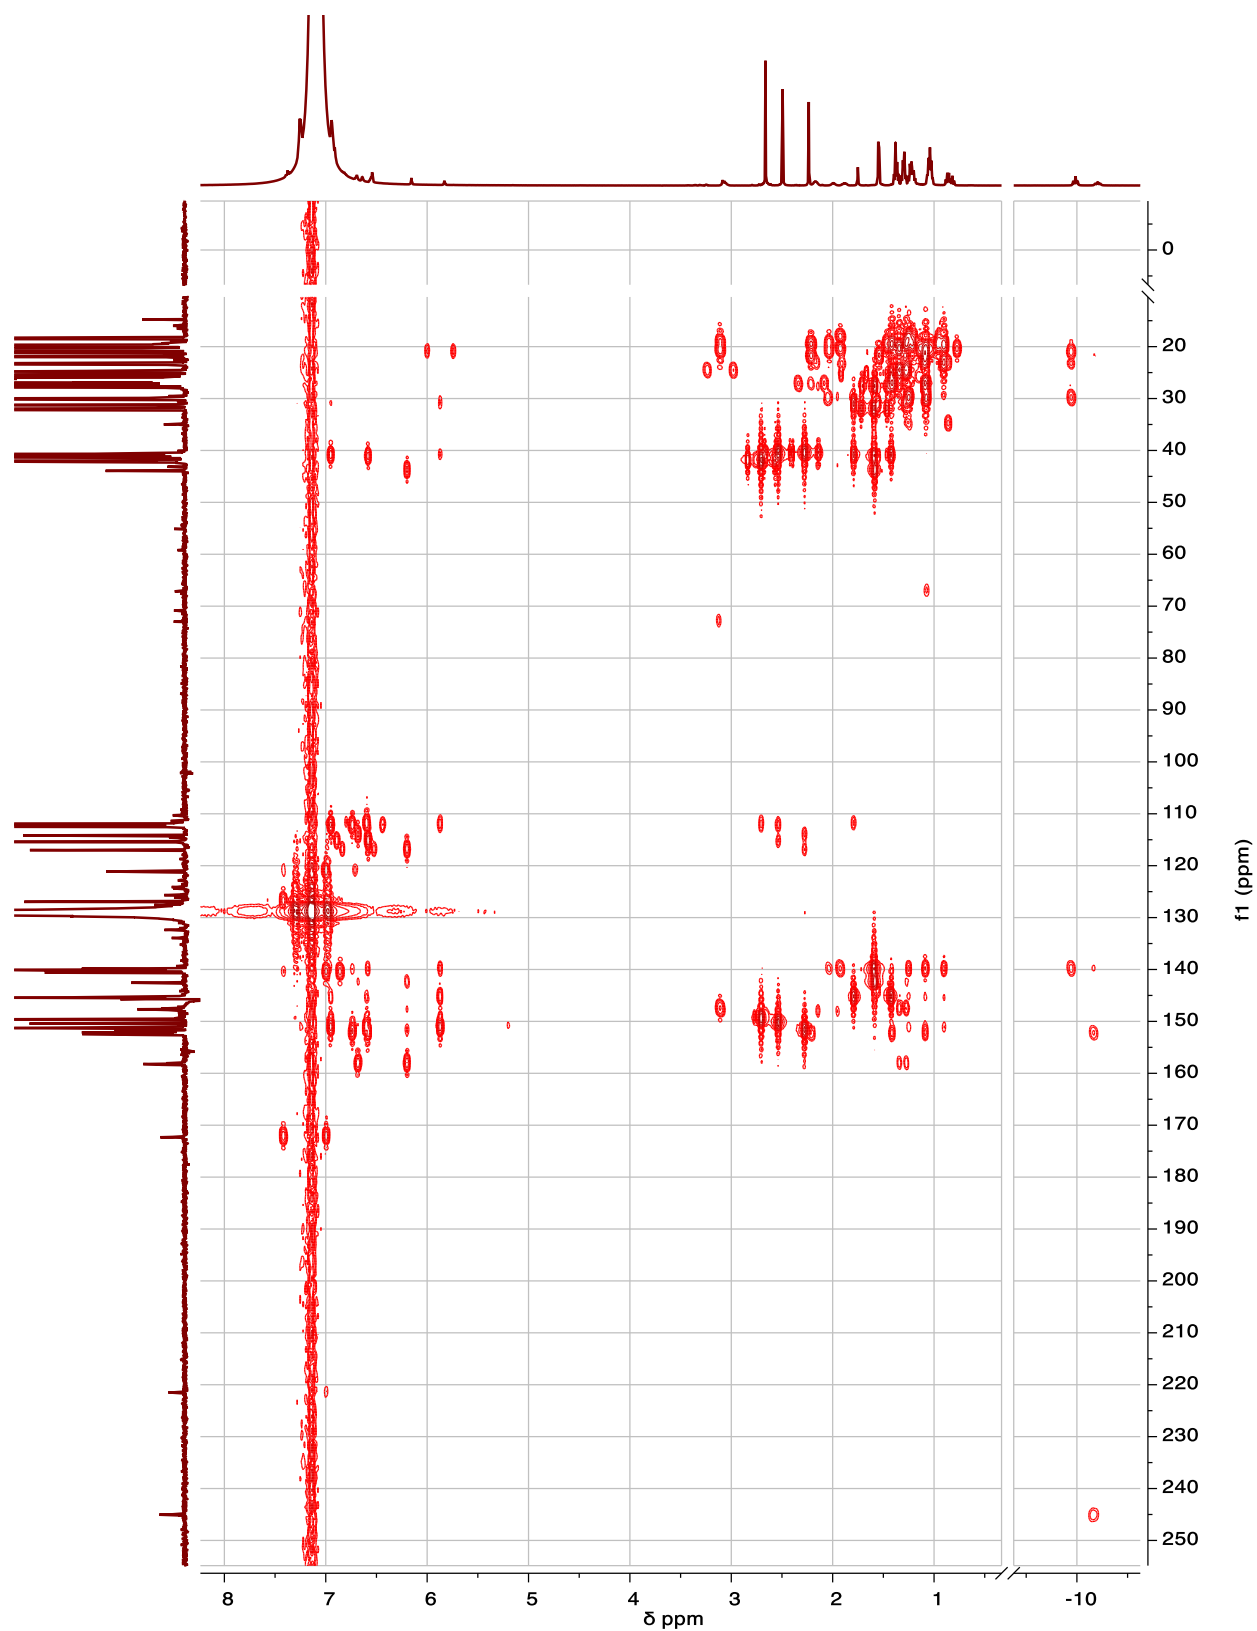

**Figure S21.**  $^1\text{H}$ - $^{13}\text{C}$  HMBC resulting from a mixture of **Ir-H<sub>4</sub>** and **Ir-Ph** in  $\text{C}_6\text{H}_6$  spiked with  $\text{C}_6\text{D}_{12}$  for locking and shimming.

## Deuteration of *m*-xylene (Example in Figure 4)

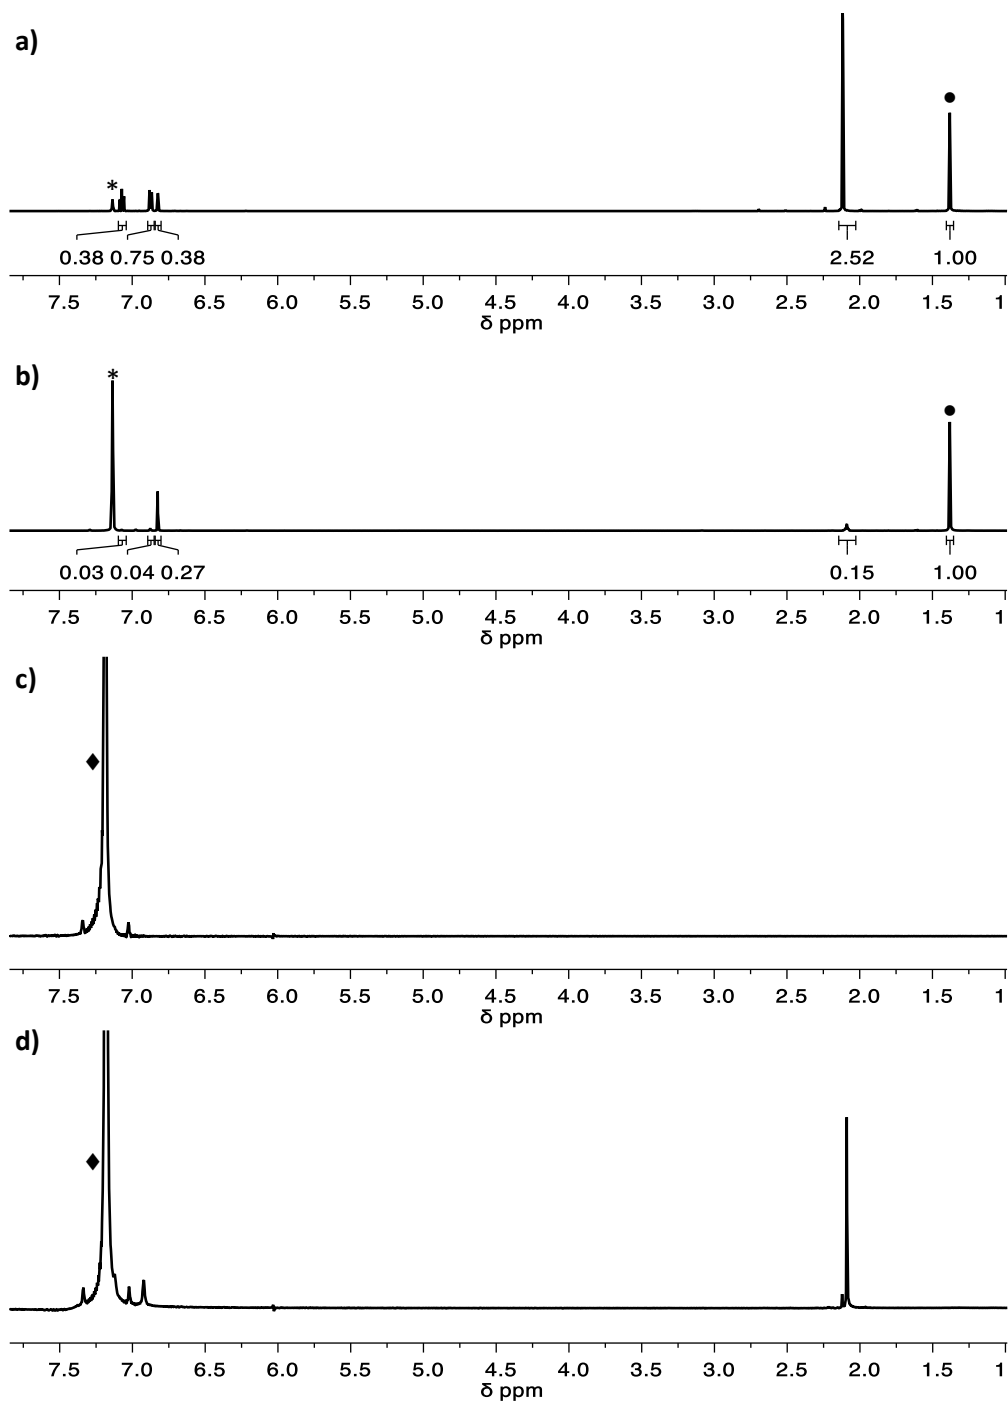

**Figure S22.**  $^1\text{H}$  NMR (500 MHz,  $\text{C}_6\text{D}_6$ ) spectra of *m*-xylene (a) before and (b) after exhaustive deuteration under the conditions outlined for method [1] in Figure 4.  $^2\text{H}$  NMR (77 MHz,  $\text{C}_6\text{D}_6$ ) spectra of *m*-xylene (c) before and (d) after exhaustive deuteration under the conditions outlined for method [1] in Figure 4. Asterisk (\*) denotes residual solvent, bullet (•) denotes  $\text{C}_6\text{H}_{12}$  internal standard, and diamond (♦) denotes  $\text{C}_6\text{D}_6$ .



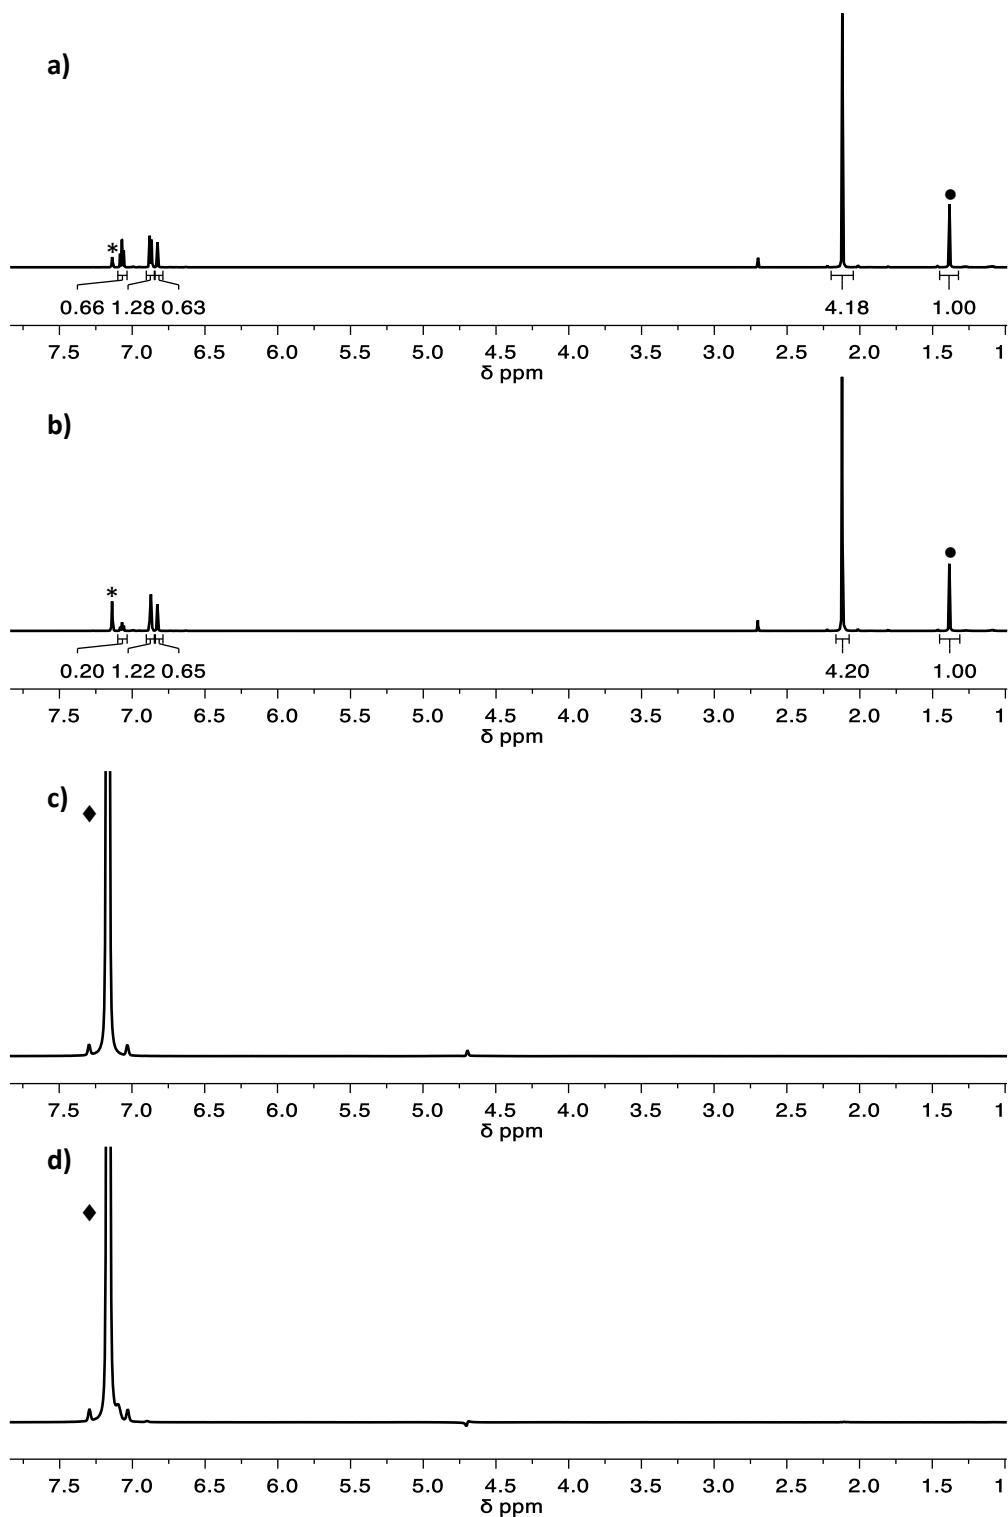

**Figure S23.**  $^1\text{H}$  NMR (600 MHz,  $\text{C}_6\text{D}_6$ ) spectra of *m*-xylene (a) before and (b) after selective deuteration under the conditions outlined for method [2] in Figure 4.  $^2\text{H}$  NMR (92 MHz,  $\text{C}_6\text{D}_6$ ) spectra of *m*-xylene (c) before and (d) after selective deuteration under the conditions outlined for method [2] in Figure 4. Asterisk (\*) denotes residual solvent, bullet ( $\bullet$ ) denotes  $\text{C}_6\text{H}_{12}$  internal standard, and diamond ( $\blacklozenge$ ) denotes  $\text{C}_6\text{D}_6$ .

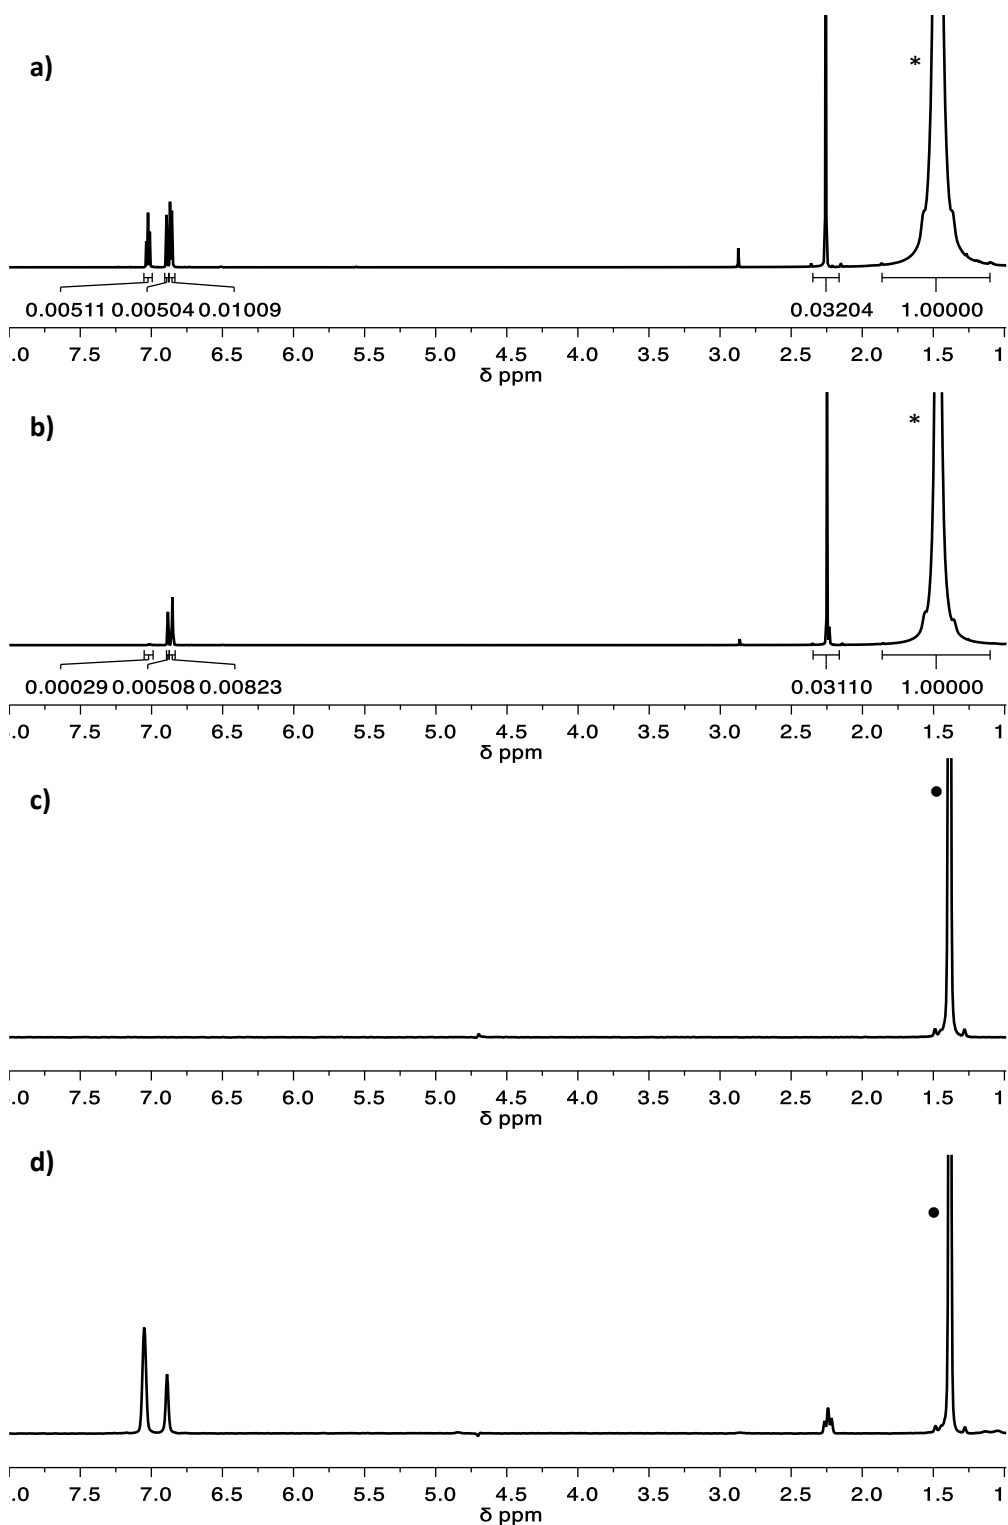

**Figure S24.**  $^1\text{H}$  NMR (600 MHz,  $\text{C}_6\text{H}_{12}$ , spiked with  $\text{C}_6\text{D}_{12}$ ) spectra of *m*-xylene (a) before and (b) after deuteration under the conditions outlined for method [3] in Figure 4.  $^2\text{H}$  NMR (92 MHz,  $\text{C}_6\text{H}_{12}$ , spiked with  $\text{C}_6\text{D}_{12}$ ) spectra of *m*-xylene (c) before and (d) after deuteration under the conditions outlined for [3] in Figure 4. Asterisk (\*) denotes  $\text{C}_6\text{H}_{12}$  solvent, bullet (•) denotes  $\text{C}_6\text{D}_{12}$  spike.

## NMR Spectra of Deuterated Compounds from Neat Reactions

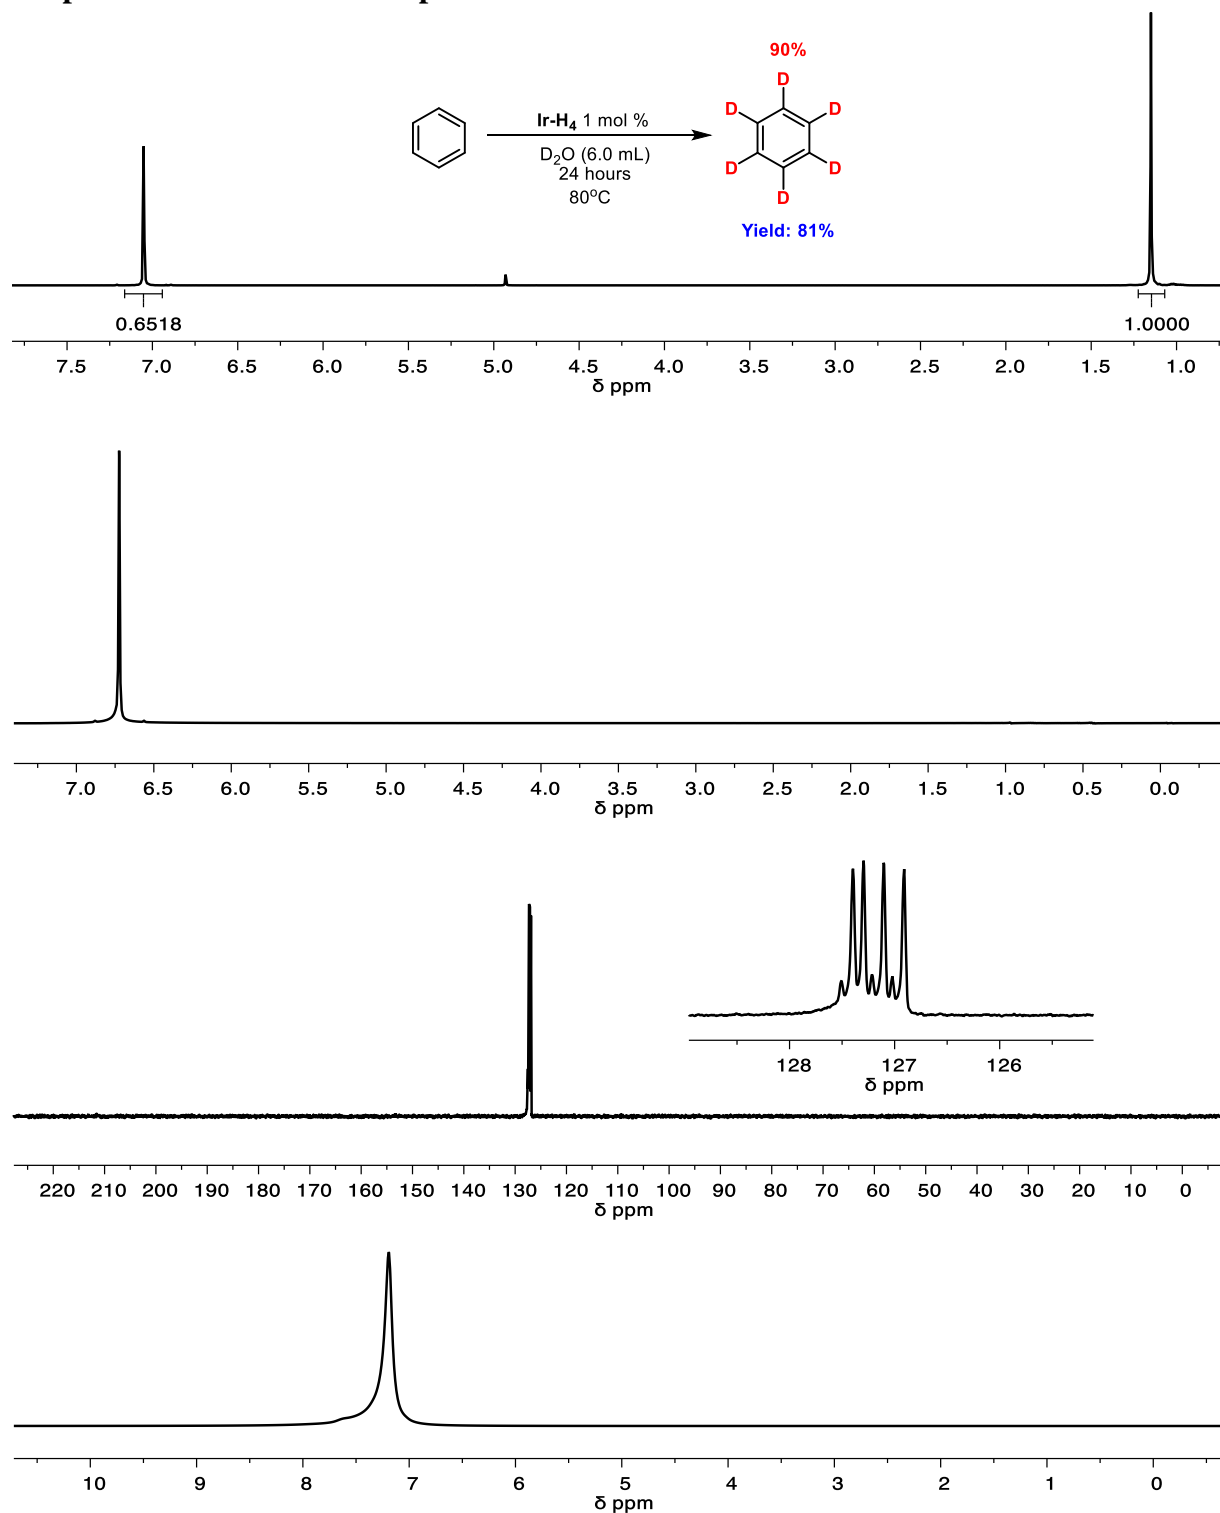

**Figure S25.** NMR spectra following deuteration of neat benzene using  $\text{D}_2\text{O}$  and  $\text{Ir-H}_4$  (1 mol %).  $^1\text{H}$  NMR (500 MHz, top) of benzene product (0.0777 g) and  $\text{C}_6\text{H}_{12}$  (0.0061 g, 0.0725 mmol) in 0.6 mL of  $\text{CD}_2\text{Cl}_2$ .  $^1\text{H}$  NMR (500 MHz, 2<sup>nd</sup> from top),  $^{13}\text{C}$   $\{^1\text{H}\}$  NMR (126 MHz, 2<sup>nd</sup> from bottom) and  $^2\text{H}$  NMR (77 MHz, bottom) of neat deuterated benzene product.

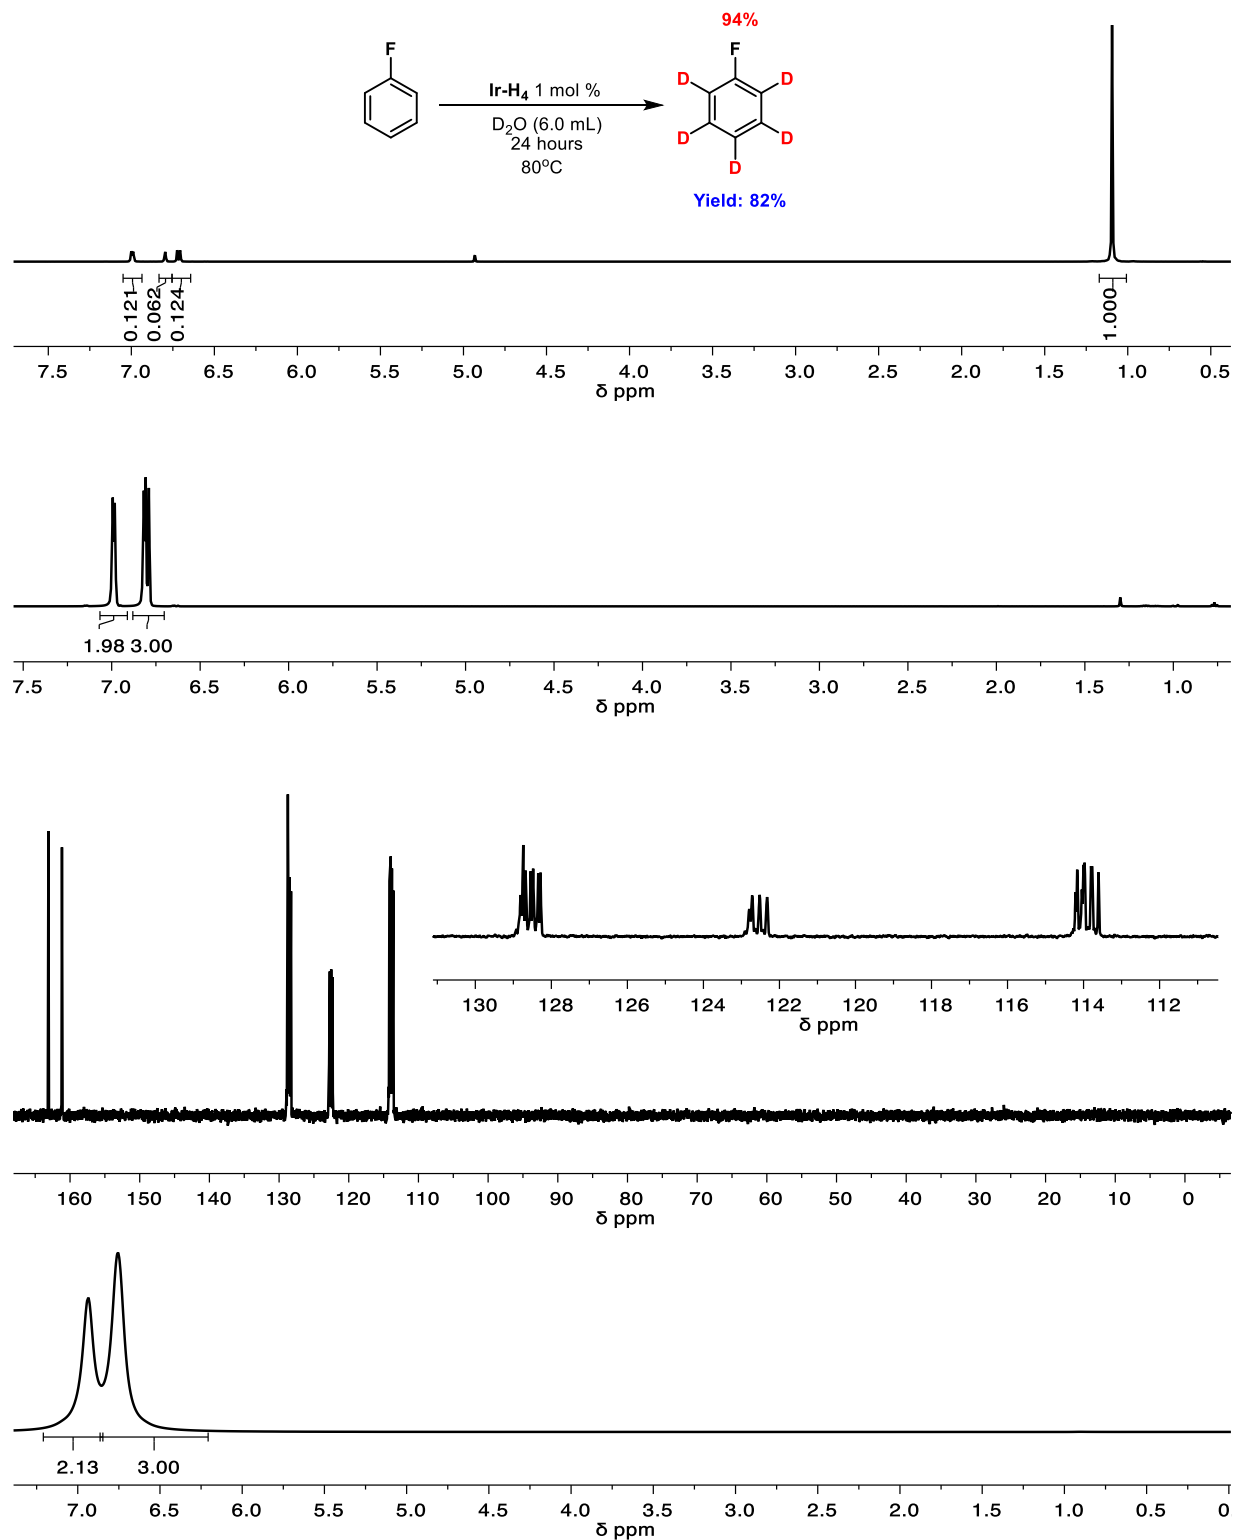

**Figure S26.** NMR spectra following deuteration of neat fluorobenzene using  $\text{D}_2\text{O}$  and **Ir-H<sub>4</sub>** (1 mol %).  $^1\text{H}$  NMR (500 MHz, top) of fluorobenzene product (0.0808 g) and  $\text{C}_6\text{H}_{12}$  (0.0058 g, 0.0689 mmol) in 0.6 mL of  $\text{CD}_2\text{Cl}_2$ .  $^1\text{H}$  NMR (500 MHz, 2<sup>nd</sup> from top),  $^{13}\text{C}$   $\{^1\text{H}\}$  NMR (126 MHz, 2<sup>nd</sup> from bottom) and  $^2\text{H}$  NMR (77 MHz) of neat deuterated fluorobenzene product.

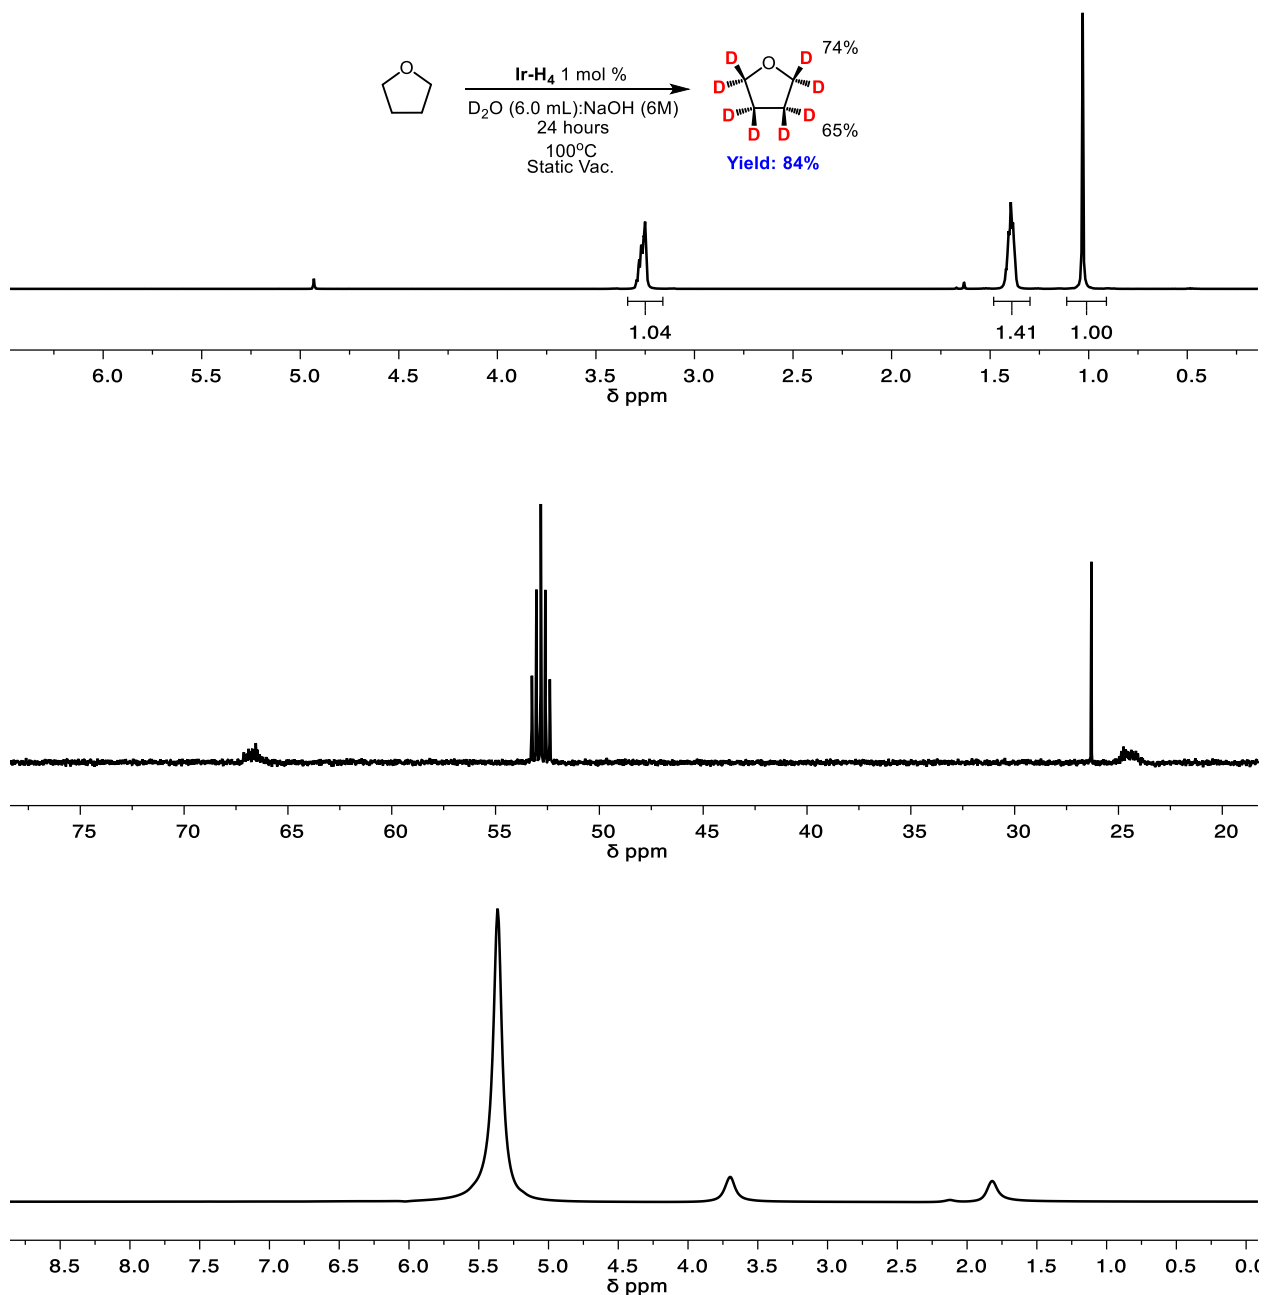

**Figure S27.** NMR spectra following deuteration of neat THF using a NaOH:D<sub>2</sub>O (6 M) solution and **Ir-H<sub>4</sub>** (1 mol %).  $^1\text{H}$  NMR (500 MHz, top),  $^{13}\text{C } \{^1\text{H}\}$  NMR (126 MHz, middle) and  $^2\text{H}$  NMR (77 MHz, bottom) of THF product (0.0506 g) and C<sub>6</sub>H<sub>12</sub> (0.0049 g, 0.0582 mmol) in 0.6 mL of CD<sub>2</sub>Cl<sub>2</sub>.

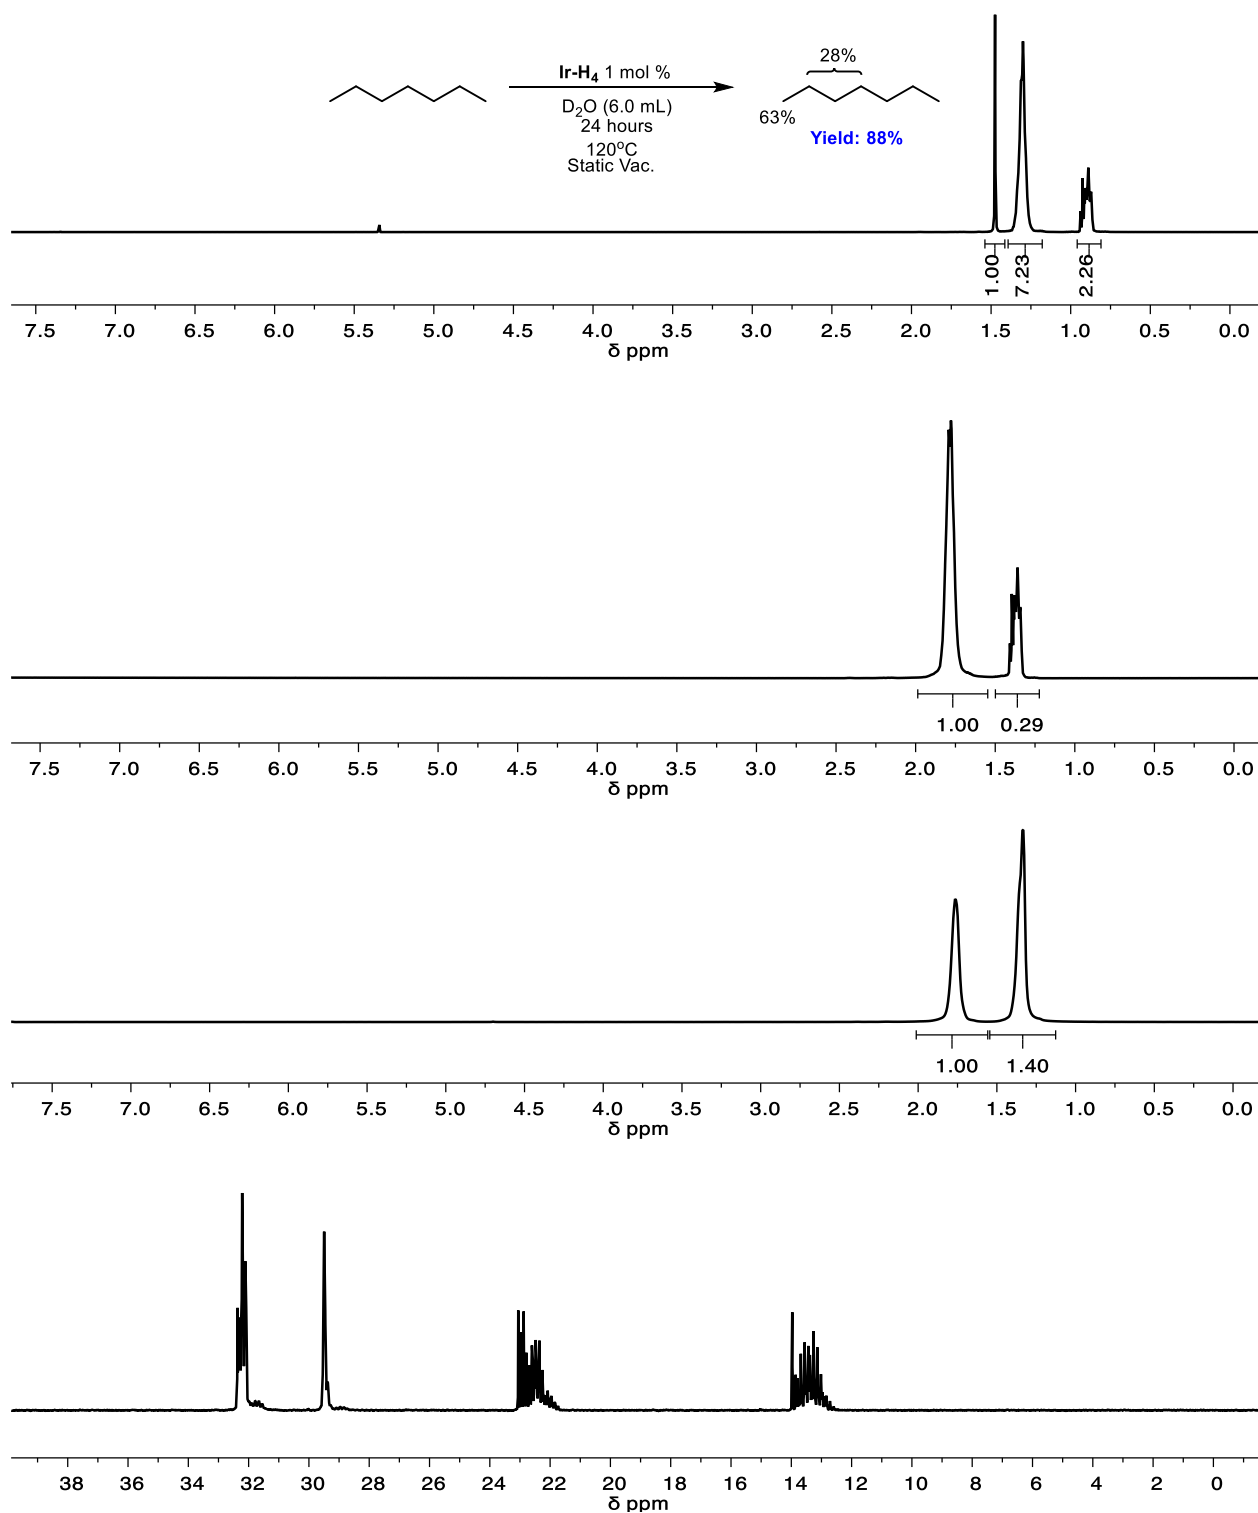

**Figure S28.** NMR spectra following deuteration of neat *n*-heptane using  $\text{D}_2\text{O}$  and **Ir-H<sub>4</sub>** (1 mol %).  $^1\text{H}$  NMR (500 MHz, top) of *n*-heptane product (0.0786 g) and  $\text{C}_6\text{H}_{12}$  (0.0051 g, 0.0606 mmol) in 0.6 mL of  $\text{CD}_2\text{Cl}_2$ .  $^1\text{H}$  NMR (500 MHz, 2<sup>nd</sup> from top),  $^{13}\text{C}$   $\{^1\text{H}\}$  NMR (126 MHz, 2<sup>nd</sup> from bottom) and  $^2\text{H}$  NMR (77 MHz, bottom) of neat deuterated *n*-heptane product.

## Crystallographic Data

**Table S3.** Crystal Data Collection and Refinement Parameters for **Ir-H4** and **Ir-Ph**.

|                                              | <b>Ir-H4</b>                                                                  | <b>Ir-Ph</b>                                                    |
|----------------------------------------------|-------------------------------------------------------------------------------|-----------------------------------------------------------------|
| <b>formula</b>                               | C <sub>32</sub> H <sub>51</sub> N <sub>2</sub> P <sub>2</sub> Ir <sub>1</sub> | C <sub>38</sub> H <sub>55</sub> IrN <sub>2</sub> P <sub>2</sub> |
| <b>fw</b>                                    | 719.90                                                                        | 793.98                                                          |
| <b>crystal system</b>                        | triclinic                                                                     | orthorhombic                                                    |
| <b>space group</b>                           | P-1                                                                           | Pbca                                                            |
| <b>a (Å)</b>                                 | 10.1782(6)                                                                    | 10.1805(7)                                                      |
| <b>b (Å)</b>                                 | 10.3490(5)                                                                    | 22.3462(15)                                                     |
| <b>c (Å)</b>                                 | 16.3636(11)                                                                   | 31.760(2)                                                       |
| <b>α (deg)</b>                               | 82.024(3)                                                                     | 90                                                              |
| <b>β (deg)</b>                               | 74.304(4)                                                                     | 90                                                              |
| <b>γ (deg)</b>                               | 82.558(3)                                                                     | 90                                                              |
| <b>V (Å<sup>3</sup>)</b>                     | 1635.65(17)                                                                   | 7225.3(9)                                                       |
| <b>Z</b>                                     | 2                                                                             | 8                                                               |
| <b>T (K)</b>                                 | 173(2)                                                                        | 173(2)                                                          |
| <b>Wavelength (Å)</b>                        | 0.71073                                                                       | 0.71073                                                         |
| <b>ρ<sub>calcd</sub> (g·cm<sup>-3</sup>)</b> | 1.462                                                                         | 1.460                                                           |
| <b>F(000)</b>                                | 732                                                                           | 3232                                                            |
| <b>μ (mm<sup>-1</sup>)</b>                   | 4.201                                                                         | 3.812                                                           |
| <b>crystal size, mm<sup>3</sup></b>          | 0.2×0.2×0.2                                                                   | 0.1×0.1×0.05                                                    |
| <b>transmission factors</b>                  | 0.5024 – 0.7456                                                               | 0.5598 – 0.7456                                                 |
| <b>θ range (deg)</b>                         | 2.157 – 24.999                                                                | 3.321 – 24.999                                                  |
| <b>data/restraints/param</b>                 | 5744/0/348                                                                    | 6342/0/402                                                      |
| <b>GOF</b>                                   | 1.025                                                                         | 1.076                                                           |
| <b>R<sub>1</sub> [I &gt; 2σ(I)]</b>          | 0.0403                                                                        | 0.0335                                                          |
| <b>wR<sub>2</sub> [all data]</b>             | 0.0922                                                                        | 0.0680                                                          |
| <b>residual density, e/Å<sup>3</sup></b>     | 1.435 and -1.537                                                              | 1.013 and -1.287                                                |

## DFT Calculation Details

The M06 functional<sup>3</sup> was used with the 6-31G\*\*[LANL2DZ for Ir]<sup>4</sup> basis set for geometry optimizations in Gaussian 16.<sup>5</sup> Stationary points were verified as either minima or transition-state structures by calculation and visualization of vibrational frequencies. Geometry optimization and single point calculations were done in both the gas phase and benzene solvent using the SMD model.<sup>6</sup> For all ground-state and transition-state structures we calculated all reasonable conformations. The xyz coordinates of the lowest energy conformations are found below. Reported enthalpies and free energies in SMD benzene solvent are at 1 atm and 298 K. Final energies were calculated using M06/Def2-TZVP//M06-L/6-31G\*\*[LANL2DZ for Ir].

## Cartesian Coordinates for Structures Calculated using M06 DFT.

|                                                 |          |         |          |          |          |         |          |
|-------------------------------------------------|----------|---------|----------|----------|----------|---------|----------|
| <b>92</b>                                       |          |         |          | <b>C</b> | -0.00025 | 4.64565 | 0.42098  |
| <b>Gas phase 1-H<sub>4</sub> (tetrahydride)</b> |          |         |          | <b>H</b> | 0.87308  | 5.17174 | 0.82092  |
| <b>C</b>                                        | -1.24169 | 1.03335 | 0.39215  | <b>H</b> | -0.00023 | 4.74918 | -0.67100 |
| <b>C</b>                                        | -2.41874 | 0.36393 | 0.04091  | <b>H</b> | -0.87365 | 5.17166 | 0.82088  |
| <b>C</b>                                        | -3.58613 | 1.04869 | -0.29264 | <b>C</b> | -0.00021 | 3.17236 | 2.40376  |
| <b>C</b>                                        | -3.60524 | 2.45075 | -0.30169 | <b>H</b> | -0.89221 | 3.68681 | 2.78430  |
| <b>C</b>                                        | -2.41383 | 3.11897 | 0.03400  | <b>H</b> | -0.00016 | 2.15306 | 2.80484  |
| <b>H</b>                                        | -4.46776 | 0.48724 | -0.59069 | <b>H</b> | 0.89170  | 3.68692 | 2.78434  |
| <b>H</b>                                        | -2.40513 | 4.20316 | 0.01291  | <b>C</b> | 4.67284  | 4.57565 | -0.86861 |
| <b>C</b>                                        | 3.60500  | 2.45112 | -0.30159 | <b>H</b> | 5.65946  | 4.95216 | -1.15015 |
| <b>C</b>                                        | 3.58606  | 1.04907 | -0.29241 | <b>H</b> | 3.96570  | 4.83435 | -1.67428 |
| <b>C</b>                                        | 2.41874  | 0.36418 | 0.04112  | <b>H</b> | 4.36307  | 5.11901 | 0.03497  |
| <b>C</b>                                        | 1.24158  | 1.03347 | 0.39225  | <b>C</b> | 5.90233  | 2.43101 | -1.11728 |
| <b>C</b>                                        | 1.25207  | 2.43887 | 0.39113  | <b>H</b> | 5.70085  | 1.88094 | -2.05255 |
| <b>C</b>                                        | 2.41349  | 3.11921 | 0.03405  | <b>H</b> | 6.72079  | 3.13071 | -1.30445 |
| <b>H</b>                                        | 4.46779  | 0.48771 | -0.59034 | <b>H</b> | 6.25811  | 1.70404 | -0.37337 |
| <b>H</b>                                        | 2.40465  | 4.20340 | 0.01293  | <b>C</b> | -4.67342 | 4.57535 | -0.86779 |
| <b>C</b>                                        | -1.25234 | 2.43874 | 0.39107  | <b>H</b> | -3.96641 | 4.83468 | -1.67338 |
| <b>C</b>                                        | -0.00018 | 3.18303 | 0.85999  | <b>H</b> | -5.66013 | 4.95184 | -1.14902 |
| <b>C</b>                                        | -0.00003 | 0.27424 | 0.77271  | <b>H</b> | -4.36365 | 5.11823 | 0.03608  |
| <b>N</b>                                        | 4.75565  | 3.15553 | -0.62964 | <b>C</b> | -5.90290 | 2.43061 | -1.11665 |
| <b>N</b>                                        | -4.75590 | 3.15508 | -0.62972 | <b>H</b> | -6.72133 | 3.13038 | -1.30367 |



|   |          |          |          |                                                         |          |          |          |
|---|----------|----------|----------|---------------------------------------------------------|----------|----------|----------|
| H | -5.70190 | 1.88031  | -2.05190 | H                                                       | 5.22130  | -2.35009 | 0.57381  |
| H | -6.25846 | 1.70383  | -0.37243 | H                                                       | 5.00239  | -0.75525 | 1.32923  |
| P | -2.28717 | -1.46018 | 0.03559  | H                                                       | 5.25700  | -2.18697 | 2.33307  |
| P | 2.28736  | -1.45995 | 0.03583  | H                                                       | -0.00007 | 0.17984  | 1.87127  |
| C | -3.27953 | -2.04415 | -1.42165 | Ir                                                      | 0.00011  | -1.79652 | 0.03715  |
| C | -3.31540 | -3.56837 | -1.44304 | H                                                       | 0.00005  | -2.13013 | 1.65813  |
| C | -2.71795 | -1.49069 | -2.72423 | H                                                       | 0.00014  | -0.89276 | -1.35211 |
| H | -4.30236 | -1.65961 | -1.28577 | H                                                       | 0.00018  | -3.39550 | 0.37417  |
| H | -3.79971 | -3.99426 | -0.55604 | H                                                       | 0.00023  | -2.79149 | -1.25234 |
| H | -3.86557 | -3.92242 | -2.32386 |                                                         |          |          |          |
| H | -2.29674 | -3.97409 | -1.49603 | <b>92</b>                                               |          |          |          |
| H | -2.67506 | -0.39546 | -2.72171 | <b>Gas phase 2-H<sub>4</sub> (dihydrogen dihydride)</b> |          |          |          |
| H | -1.70086 | -1.86243 | -2.89543 | C                                                       | -1.23497 | 1.02998  | 0.44048  |
| H | -3.34658 | -1.80828 | -3.56601 | C                                                       | -2.40021 | 0.36882  | 0.03585  |
| C | -3.26054 | -2.03812 | 1.52349  | C                                                       | -3.55504 | 1.05942  | -0.33237 |
| C | -4.76619 | -1.82468 | 1.42032  | C                                                       | -3.57593 | 2.46044  | -0.32074 |
| C | -2.72120 | -1.37922 | 2.78767  | C                                                       | -2.39526 | 3.12339  | 0.06131  |
| H | -3.03923 | -3.11643 | 1.57069  | H                                                       | -4.42424 | 0.50235  | -0.67206 |
| H | -5.22110 | -2.35050 | 0.57319  | H                                                       | -2.38402 | 4.20779  | 0.05104  |
| H | -5.25701 | -2.18754 | 2.33246  | C                                                       | 3.57589  | 2.46048  | -0.32059 |
| H | -5.00239 | -0.75571 | 1.32876  | C                                                       | 3.55498  | 1.05947  | -0.33229 |
| H | -1.64486 | -1.54618 | 2.90355  | C                                                       | 2.40014  | 0.36885  | 0.03590  |
| H | -2.90230 | -0.29594 | 2.76960  | C                                                       | 1.23489  | 1.02999  | 0.44054  |
| H | -3.22947 | -1.78764 | 3.67001  | C                                                       | 1.24710  | 2.43739  | 0.44666  |
| C | 3.27994  | -2.04385 | -1.42129 | C                                                       | 2.39520  | 3.12342  | 0.06145  |
| C | 2.71831  | -1.49066 | -2.72397 | H                                                       | 4.42416  | 0.50240  | -0.67201 |
| C | 3.31613  | -3.56807 | -1.44251 | H                                                       | 2.38395  | 4.20781  | 0.05121  |
| H | 4.30268  | -1.65909 | -1.28539 | C                                                       | -1.24716 | 2.43738  | 0.44659  |
| H | 2.67525  | -0.39544 | -2.72160 | C                                                       | -0.00005 | 3.17551  | 0.93737  |
| H | 3.34702  | -1.80827 | -3.56568 | C                                                       | -0.00005 | 0.26564  | 0.84478  |
| H | 1.70128  | -1.86259 | -2.89516 | N                                                       | 4.71646  | 3.17042  | -0.67418 |
| H | 3.80044  | -3.99375 | -0.55540 | N                                                       | -4.71647 | 3.17034  | -0.67443 |
| H | 2.29757  | -3.97401 | -1.49555 | C                                                       | -0.00004 | 4.64617  | 0.52647  |
| H | 3.86646  | -3.92211 | -2.32322 | H                                                       | 0.87392  | 5.16359  | 0.93668  |
| C | 3.26061  | -2.03776 | 1.52386  | H                                                       | 0.00002  | 4.77171  | -0.56327 |
| C | 2.72107  | -1.37887 | 2.78795  | H                                                       | -0.87406 | 5.16357  | 0.93659  |
| C | 4.76626  | -1.82423 | 1.42084  | C                                                       | -0.00011 | 3.14068  | 2.48038  |
| H | 3.03937  | -3.11609 | 1.57107  | H                                                       | -0.89181 | 3.65036  | 2.86808  |
| H | 1.64473  | -1.54592 | 2.90371  | H                                                       | -0.00013 | 2.11624  | 2.86684  |
| H | 3.22927  | -1.78724 | 3.67036  | H                                                       | 0.89155  | 3.65036  | 2.86815  |
| H | 2.90209  | -0.29558 | 2.76988  | C                                                       | 4.62369  | 4.59215  | -0.89930 |

|   |          |          |          |                                                         |          |          |          |
|---|----------|----------|----------|---------------------------------------------------------|----------|----------|----------|
| H | 5.60196  | 4.97376  | -1.20255 | H                                                       | 2.45673  | -0.40587 | -2.75103 |
| H | 3.89544  | 4.85615  | -1.68436 | H                                                       | 3.15426  | -1.78341 | -3.63185 |
| H | 4.33581  | 5.12683  | 0.01652  | H                                                       | 1.55345  | -1.92641 | -2.87172 |
| C | 5.84552  | 2.45278  | -1.21024 | H                                                       | 3.85921  | -3.94739 | -0.65381 |
| H | 5.61500  | 1.92046  | -2.14919 | H                                                       | 2.28792  | -3.97515 | -1.47999 |
| H | 6.66019  | 3.15398  | -1.40848 | H                                                       | 3.79159  | -3.88326 | -2.42146 |
| H | 6.22094  | 1.71114  | -0.49085 | C                                                       | 3.31298  | -2.03604 | 1.45914  |
| C | -4.62384 | 4.59212  | -0.89927 | C                                                       | 2.80150  | -1.40665 | 2.75021  |
| H | -3.89547 | 4.85633  | -1.68414 | C                                                       | 4.80924  | -1.78535 | 1.31393  |
| H | -5.60210 | 4.97366  | -1.20266 | H                                                       | 3.12400  | -3.12120 | 1.49631  |
| H | -4.33620 | 5.12670  | 0.01669  | H                                                       | 1.73198  | -1.58733 | 2.90476  |
| C | -5.84568 | 2.45267  | -1.21011 | H                                                       | 3.34423  | -1.81469 | 3.61206  |
| H | -6.66034 | 3.15388  | -1.40835 | H                                                       | 2.95801  | -0.31975 | 2.73989  |
| H | -5.61537 | 1.92016  | -2.14901 | H                                                       | 5.24509  | -2.27548 | 0.43602  |
| H | -6.22101 | 1.71119  | -0.49051 | H                                                       | 5.01777  | -0.70914 | 1.24529  |
| P | -2.27389 | -1.45459 | 0.01370  | H                                                       | 5.33953  | -2.16312 | 2.19769  |
| P | 2.27402  | -1.45458 | 0.01370  | H                                                       | -0.00006 | 0.20411  | 1.94781  |
| C | -3.21347 | -2.01987 | -1.48568 | Ir                                                      | -0.00003 | -1.81503 | 0.09973  |
| C | -3.29676 | -3.54190 | -1.50341 | H                                                       | 0.00037  | -2.39603 | 1.80896  |
| C | -2.55621 | -1.49790 | -2.75669 | H                                                       | 0.00005  | -1.06892 | -1.31158 |
| H | -4.22833 | -1.59897 | -1.41096 | H                                                       | 0.00005  | -3.11474 | 1.31967  |
| H | -3.86004 | -3.94714 | -0.65399 | H                                                       | -0.00048 | -3.21833 | -0.79848 |
| H | -3.79112 | -3.88333 | -2.42162 |                                                         |          |          |          |
| H | -2.28815 | -3.97543 | -1.47910 | <b>92</b>                                               |          |          |          |
| H | -2.45587 | -0.40620 | -2.75102 | <b>Gas phase 3-H<sub>4</sub> (dihydrogen dihydride)</b> |          |          |          |
| H | -1.55311 | -1.92702 | -2.87161 | C                                                       | -1.23820 | 1.01844  | 0.35969  |
| H | -3.15381 | -1.78348 | -3.63188 | C                                                       | -2.41768 | 0.35964  | 0.00649  |
| C | -3.31291 | -2.03617 | 1.45906  | C                                                       | -3.58274 | 1.04777  | -0.32564 |
| C | -4.80910 | -1.78514 | 1.31389  | C                                                       | -3.59747 | 2.44965  | -0.32376 |
| C | -2.80130 | -1.40719 | 2.75030  | C                                                       | -2.40685 | 3.11035  | 0.02872  |
| H | -3.12414 | -3.12137 | 1.49596  | H                                                       | -4.46623 | 0.48997  | -0.62506 |
| H | -5.24502 | -2.27495 | 0.43583  | H                                                       | -2.39606 | 4.19466  | 0.02440  |
| H | -5.33951 | -2.16303 | 2.19754  | C                                                       | 3.59750  | 2.44965  | -0.32355 |
| H | -5.01739 | -0.70887 | 1.24552  | C                                                       | 3.58276  | 1.04778  | -0.32545 |
| H | -1.73186 | -1.58832 | 2.90485  | C                                                       | 2.41769  | 0.35963  | 0.00658  |
| H | -2.95740 | -0.32023 | 2.74019  | C                                                       | 1.23820  | 1.01845  | 0.35975  |
| H | -3.34423 | -1.81519 | 3.61205  | C                                                       | 1.24763  | 2.42347  | 0.38048  |
| C | 3.21367  | -2.01981 | -1.48566 | C                                                       | 2.40685  | 3.11036  | 0.02885  |
| C | 2.55668  | -1.49761 | -2.75671 | H                                                       | 4.46628  | 0.49000  | -0.62482 |
| C | 3.29665  | -3.54186 | -1.50356 | H                                                       | 2.39608  | 4.19466  | 0.02450  |
| H | 4.22860  | -1.59911 | -1.41082 | C                                                       | -1.24765 | 2.42347  | 0.38040  |

|   |          |          |          |                                                         |          |          |          |
|---|----------|----------|----------|---------------------------------------------------------|----------|----------|----------|
| C | -0.00004 | 3.15981  | 0.86684  | C                                                       | -4.75814 | -1.76977 | 1.45888  |
| C | -0.00001 | 0.23995  | 0.73152  | C                                                       | -2.68681 | -1.31042 | 2.78655  |
| N | 4.74357  | 3.16052  | -0.65172 | H                                                       | -3.03917 | -3.07060 | 1.61830  |
| N | -4.74351 | 3.16052  | -0.65204 | H                                                       | -5.22971 | -2.31545 | 0.63339  |
| C | -0.00011 | 4.63187  | 0.46117  | H                                                       | -5.23864 | -2.10316 | 2.38773  |
| H | 0.87332  | 5.14832  | 0.87336  | H                                                       | -4.98810 | -0.70200 | 1.34087  |
| H | 0.00009  | 4.76047  | -0.62813 | H                                                       | -1.60883 | -1.48465 | 2.87853  |
| H | -0.87381 | 5.14813  | 0.87301  | H                                                       | -2.86337 | -0.22663 | 2.75088  |
| C | -0.00016 | 3.11494  | 2.41019  | H                                                       | -3.17881 | -1.69899 | 3.68699  |
| H | -0.89216 | 3.62109  | 2.80168  | C                                                       | 3.30474  | -2.07089 | -1.39325 |
| H | -0.00024 | 2.08717  | 2.78943  | C                                                       | 2.76993  | -1.54892 | -2.71943 |
| H | 0.89179  | 3.62104  | 2.80185  | C                                                       | 3.35571  | -3.59449 | -1.38401 |
| C | 4.65775  | 4.58396  | -0.86797 | H                                                       | 4.32310  | -1.67978 | -1.24386 |
| H | 5.64121  | 4.96537  | -1.15387 | H                                                       | 2.72806  | -0.45412 | -2.74256 |
| H | 3.94246  | 4.85396  | -1.66255 | H                                                       | 3.41384  | -1.88722 | -3.54165 |
| H | 4.35646  | 5.11363  | 0.04668  | H                                                       | 1.75330  | -1.91776 | -2.89922 |
| C | 5.89157  | 2.44416  | -1.14801 | H                                                       | 3.79992  | -4.00076 | -0.46741 |
| H | 5.68735  | 1.89662  | -2.08407 | H                                                       | 2.34617  | -4.01510 | -1.48206 |
| H | 6.70505  | 3.14899  | -1.33752 | H                                                       | 3.94837  | -3.96085 | -2.23160 |
| H | 6.25563  | 1.71607  | -0.40904 | C                                                       | 3.25324  | -1.99204 | 1.54601  |
| C | -4.65765 | 4.58393  | -0.86845 | C                                                       | 2.68707  | -1.31087 | 2.78638  |
| H | -3.94211 | 4.85381  | -1.66284 | C                                                       | 4.75829  | -1.76965 | 1.45846  |
| H | -5.64103 | 4.96528  | -1.15475 | H                                                       | 3.03955  | -3.07086 | 1.61771  |
| H | -4.35666 | 5.11377  | 0.04621  | H                                                       | 1.60910  | -1.48511 | 2.87841  |
| C | -5.89161 | 2.44412  | -1.14801 | H                                                       | 3.17919  | -1.69943 | 3.68675  |
| H | -6.70513 | 3.14894  | -1.33742 | H                                                       | 2.86356  | -0.22706 | 2.75080  |
| H | -5.68760 | 1.89646  | -2.08404 | H                                                       | 5.22994  | -2.31491 | 0.63276  |
| H | -6.25552 | 1.71612  | -0.40887 | H                                                       | 4.98798  | -0.70178 | 1.34078  |
| P | -2.28532 | -1.45706 | 0.03610  | H                                                       | 5.23894  | -2.10322 | 2.38716  |
| P | 2.28526  | -1.45708 | 0.03601  | H                                                       | -0.00002 | 0.14612  | 1.83214  |
| C | -3.30493 | -2.07106 | -1.39290 | Ir                                                      | 0.00003  | -1.78330 | 0.03801  |
| C | -3.35566 | -3.59467 | -1.38349 | H                                                       | -0.00021 | -2.30567 | 1.64192  |
| C | -2.77042 | -1.54914 | -2.71923 | H                                                       | 0.00003  | -1.07105 | -1.48470 |
| H | -4.32335 | -1.68014 | -1.24342 | H                                                       | 0.00015  | -3.53869 | -0.09857 |
| H | -3.79828 | -4.00093 | -0.46610 | H                                                       | 0.00028  | -3.24560 | -0.93918 |
| H | -3.94966 | -3.96121 | -2.23006 |                                                         |          |          |          |
| H | -2.34618 | -4.01505 | -1.48314 | <b>92</b>                                               |          |          |          |
| H | -2.72927 | -0.45433 | -2.74267 | <b>Gas phase 4-H<sub>4</sub> (dihydrogen dihydride)</b> |          |          |          |
| H | -1.75355 | -1.91741 | -2.89886 | C                                                       | -1.24346 | 1.03232  | 0.38108  |
| H | -3.41408 | -1.88812 | -3.54136 | C                                                       | -2.43097 | 0.36116  | 0.05782  |
| C | -3.25305 | -1.99184 | 1.54632  | C                                                       | -3.60360 | 1.04731  | -0.25434 |

|   |          |         |          |   |          |          |          |
|---|----------|---------|----------|---|----------|----------|----------|
| C | -3.61698 | 2.44973 | -0.28334 | P | -2.28300 | -1.46701 | 0.05338  |
| C | -2.41884 | 3.11819 | 0.02667  | P | 2.28306  | -1.46691 | 0.05365  |
| H | -4.49648 | 0.48679 | -0.51947 | C | -3.43159 | -2.07151 | -1.27963 |
| H | -2.40752 | 4.20228 | -0.00382 | C | -3.49981 | -3.59450 | -1.24938 |
| C | 3.61681  | 2.44991 | -0.28356 | C | -2.97685 | -1.58010 | -2.64750 |
| C | 3.60353  | 1.04748 | -0.25441 | H | -4.42900 | -1.65615 | -1.06832 |
| C | 2.43097  | 0.36128 | 0.05787  | H | -3.94818 | -3.98070 | -0.32651 |
| C | 1.24343  | 1.03240 | 0.38108  | H | -4.10104 | -3.96415 | -2.08969 |
| C | 1.25431  | 2.43780 | 0.37499  | H | -2.49200 | -4.02190 | -1.33783 |
| C | 2.41865  | 3.11831 | 0.02648  | H | -2.84939 | -0.49128 | -2.67816 |
| H | 4.49645  | 0.48701 | -0.51951 | H | -2.02203 | -2.04506 | -2.92328 |
| H | 2.40726  | 4.20240 | -0.00407 | H | -3.71307 | -1.85891 | -3.41190 |
| C | -1.25444 | 2.43773 | 0.37506  | C | -3.09564 | -2.03455 | 1.63733  |
| C | -0.00007 | 3.17886 | 0.84296  | C | -4.59325 | -1.75833 | 1.69672  |
| C | 0.00000  | 0.26234 | 0.72457  | C | -2.39964 | -1.41333 | 2.84243  |
| N | 4.77042  | 3.15477 | -0.60596 | H | -2.91310 | -3.12061 | 1.64989  |
| N | -4.77068 | 3.15453 | -0.60555 | H | -5.15799 | -2.26295 | 0.90458  |
| C | -0.00011 | 4.64469 | 0.41631  | H | -4.99864 | -2.10173 | 2.65704  |
| H | 0.87364  | 5.16734 | 0.82003  | H | -4.79177 | -0.68022 | 1.62598  |
| H | -0.00018 | 4.75751 | -0.67490 | H | -1.32800 | -1.63809 | 2.85185  |
| H | -0.87381 | 5.16733 | 0.82015  | H | -2.52205 | -0.32136 | 2.84485  |
| C | -0.00000 | 3.15142 | 2.38681  | H | -2.84028 | -1.79955 | 3.77006  |
| H | -0.89227 | 3.66077 | 2.77377  | C | 3.43191  | -2.07155 | -1.27908 |
| H | 0.00005  | 2.12560 | 2.77248  | C | 2.97730  | -1.58038 | -2.64709 |
| H | 0.89226  | 3.66084 | 2.77370  | C | 3.50024  | -3.59451 | -1.24858 |
| C | 4.68194  | 4.57059 | -0.86757 | H | 4.42926  | -1.65608 | -1.06768 |
| H | 5.67034  | 4.94954 | -1.13963 | H | 2.84979  | -0.49157 | -2.67793 |
| H | 3.98459  | 4.81388 | -1.68684 | H | 3.71360  | -1.85929 | -3.41137 |
| H | 4.35595  | 5.12440 | 0.02365  | H | 2.02253  | -2.04543 | -2.92286 |
| C | 5.91560  | 2.42861 | -1.09530 | H | 3.94838  | -3.98054 | -0.32553 |
| H | 5.70794  | 1.86798 | -2.02319 | H | 2.49248  | -4.02200 | -1.33723 |
| H | 6.73017  | 3.12899 | -1.29652 | H | 4.10173  | -3.96425 | -2.08867 |
| H | 6.28054  | 1.71090 | -0.34736 | C | 3.09551  | -2.03415 | 1.63783  |
| C | -4.68244 | 4.57043 | -0.86671 | C | 2.39927  | -1.41291 | 2.84277  |
| H | -3.98535 | 4.81411 | -1.68609 | C | 4.59308  | -1.75774 | 1.69740  |
| H | -5.67097 | 4.94937 | -1.13835 | H | 2.91311  | -3.12024 | 1.65048  |
| H | -4.35628 | 5.12398 | 0.02461  | H | 1.32766  | -1.63781 | 2.85207  |
| C | -5.91581 | 2.42834 | -1.09496 | H | 2.83984  | -1.79899 | 3.77050  |
| H | -6.73043 | 3.12867 | -1.29608 | H | 2.52154  | -0.32092 | 2.84511  |
| H | -5.70811 | 1.86785 | -2.02291 | H | 5.15800  | -2.26242 | 0.90543  |
| H | -6.28069 | 1.71049 | -0.34710 | H | 4.79147  | -0.67961 | 1.62651  |

|                                                             |          |          |          |   |          |          |          |
|-------------------------------------------------------------|----------|----------|----------|---|----------|----------|----------|
| H                                                           | 4.99838  | -2.10092 | 2.65785  | H | 3.92007  | 4.84954  | -1.67968 |
| H                                                           | 0.00001  | 0.09933  | 1.81648  | H | 4.34441  | 5.12495  | 0.02458  |
| Ir                                                          | 0.00011  | -1.77462 | -0.13832 | C | 5.86483  | 2.44641  | -1.17824 |
| H                                                           | 0.00001  | -2.43019 | 1.31477  | H | 5.64394  | 1.91046  | -2.11741 |
| H                                                           | -0.00004 | -0.78105 | -1.65701 | H | 6.68148  | 3.14686  | -1.37080 |
| H                                                           | -0.00006 | -3.37117 | -0.60797 | H | 6.23284  | 1.70775  | -0.45203 |
| H                                                           | 0.00002  | -1.60491 | -1.91678 | C | -4.64072 | 4.58740  | -0.88672 |
| <b>92</b>                                                   |          |          |          | H | -3.92016 | 4.84971  | -1.67934 |
| <b>Gas phase transition state for 1-H<sub>4</sub> to 2-</b> |          |          |          | H | -5.62210 | 4.96740  | -1.18176 |
| <b>H<sub>4</sub> (tetrahydride to dihydrogen dihydride)</b> |          |          |          | H | -4.34469 | 5.12479  | 0.02492  |
| C                                                           | -1.23707 | 1.03184  | 0.42548  | C | -5.86494 | 2.44632  | -1.17809 |
| C                                                           | -2.40602 | 0.36806  | 0.03741  | H | -6.68157 | 3.14678  | -1.37067 |
| C                                                           | -3.56518 | 1.05671  | -0.31935 | H | -5.64417 | 1.91024  | -2.11721 |
| C                                                           | -3.58585 | 2.45803  | -0.31296 | H | -6.23292 | 1.70776  | -0.45175 |
| C                                                           | -2.40150 | 3.12266  | 0.05415  | P | -2.27920 | -1.45511 | 0.01723  |
| H                                                           | -4.43822 | 0.49821  | -0.64655 | P | 2.27923  | -1.45508 | 0.01726  |
| H                                                           | -2.39120 | 4.20700  | 0.04107  | C | -3.23081 | -2.02324 | -1.47314 |
| C                                                           | 3.58583  | 2.45808  | -0.31292 | C | -3.30047 | -3.54600 | -1.49444 |
| C                                                           | 3.56518  | 1.05677  | -0.31931 | C | -2.60039 | -1.48900 | -2.75231 |
| C                                                           | 2.40602  | 0.36810  | 0.03744  | H | -4.24865 | -1.61328 | -1.38024 |
| C                                                           | 1.23706  | 1.03186  | 0.42550  | H | -3.84259 | -3.95909 | -0.63518 |
| C                                                           | 1.24875  | 2.43862  | 0.42966  | H | -3.81006 | -3.88895 | -2.40365 |
| C                                                           | 2.40145  | 3.12270  | 0.05417  | H | -2.28842 | -3.97181 | -1.49239 |
| H                                                           | 4.43823  | 0.49828  | -0.64650 | H | -2.52001 | -0.39577 | -2.74686 |
| H                                                           | 2.39113  | 4.20703  | 0.04109  | H | -1.59079 | -1.89756 | -2.88165 |
| C                                                           | -1.24878 | 2.43860  | 0.42964  | H | -3.20549 | -1.78510 | -3.61882 |
| C                                                           | -0.00003 | 3.17879  | 0.91329  | C | -3.29930 | -2.04090 | 1.47208  |
| C                                                           | -0.00000 | 0.27074  | 0.82372  | C | -4.79794 | -1.79650 | 1.34119  |
| N                                                           | 4.73016  | 3.16623  | -0.65690 | C | -2.77568 | -1.41231 | 2.75852  |
| N                                                           | -4.73018 | 3.16615  | -0.65697 | H | -3.10371 | -3.12493 | 1.50576  |
| C                                                           | -0.00003 | 4.64683  | 0.49292  | H | -5.24114 | -2.29017 | 0.46887  |
| H                                                           | 0.87371  | 5.16716  | 0.89973  | H | -5.31736 | -2.17470 | 2.23110  |
| H                                                           | -0.00003 | 4.76499  | -0.59761 | H | -5.01174 | -0.72124 | 1.27297  |
| H                                                           | -0.87379 | 5.16714  | 0.89973  | H | -1.70405 | -1.59292 | 2.89726  |
| C                                                           | -0.00003 | 3.15239  | 2.45662  | H | -2.93704 | -0.32595 | 2.75298  |
| H                                                           | -0.89180 | 3.66386  | 2.84174  | H | -3.30801 | -1.82477 | 3.62470  |
| H                                                           | -0.00003 | 2.12992  | 2.84859  | C | 3.23087  | -2.02319 | -1.47309 |
| H                                                           | 0.89172  | 3.66387  | 2.84175  | C | 2.60046  | -1.48895 | -2.75228 |
| C                                                           | 4.64058  | 4.58744  | -0.88693 | C | 3.30056  | -3.54595 | -1.49440 |
| H                                                           | 5.62195  | 4.96748  | -1.18192 | H | 4.24871  | -1.61321 | -1.38018 |
|                                                             |          |          |          | H | 2.52006  | -0.39572 | -2.74683 |

|    |          |          |          |   |          |         |          |
|----|----------|----------|----------|---|----------|---------|----------|
| H  | 3.20558  | -1.78505 | -3.61878 | C | 0.00000  | 3.16803 | 0.86628  |
| H  | 1.59087  | -1.89753 | -2.88163 | C | 0.00000  | 0.25101 | 0.74557  |
| H  | 3.84267  | -3.95903 | -0.63513 | N | 4.74650  | 3.16014 | -0.64662 |
| H  | 2.28850  | -3.97177 | -1.49236 | N | -4.74650 | 3.16015 | -0.64661 |
| H  | 3.81016  | -3.88889 | -2.40361 | C | 0.00000  | 4.63740 | 0.45083  |
| C  | 3.29933  | -2.04086 | 1.47212  | H | 0.87353  | 5.15661 | 0.85933  |
| C  | 2.77568  | -1.41227 | 2.75855  | H | 0.00000  | 4.75870 | -0.63932 |
| C  | 4.79796  | -1.79644 | 1.34125  | H | -0.87352 | 5.15661 | 0.85933  |
| H  | 3.10375  | -3.12489 | 1.50580  | C | 0.00000  | 3.13316 | 2.40981  |
| H  | 1.70405  | -1.59290 | 2.89728  | H | -0.89196 | 3.64179 | 2.79818  |
| H  | 3.30800  | -1.82473 | 3.62474  | H | 0.00000  | 2.10782 | 2.79535  |
| H  | 2.93703  | -0.32591 | 2.75302  | H | 0.89197  | 3.64179 | 2.79817  |
| H  | 5.24118  | -2.29011 | 0.46893  | C | 4.66131  | 4.58254 | -0.87003 |
| H  | 5.01175  | -0.72118 | 1.27303  | H | 5.64544  | 4.96241 | -1.15569 |
| H  | 5.31737  | -2.17463 | 2.23117  | H | 3.94770  | 4.84891 | -1.66738 |
| H  | -0.00001 | 0.19844  | 1.92473  | H | 4.35827  | 5.11662 | 0.04145  |
| Ir | 0.00002  | -1.81114 | 0.08797  | C | 5.89391  | 2.44127 | -1.14058 |
| H  | 0.00001  | -2.29004 | 1.71278  | H | 5.69027  | 1.89285 | -2.07630 |
| H  | 0.00002  | -1.00417 | -1.32890 | H | 6.70887  | 3.14450 | -1.32970 |
| H  | 0.00002  | -3.18108 | 1.04322  | H | 6.25566  | 1.71356 | -0.40014 |
| H  | 0.00004  | -3.10497 | -0.94290 | C | -4.66130 | 4.58254 | -0.87004 |

92

**Gas phase transition state for 1-H<sub>4</sub> to 3-H<sub>4</sub>  
(tetrahydride to dihydrogen dihydride)**

|   |          |         |          |
|---|----------|---------|----------|
| C | -1.23886 | 1.02405 | 0.37123  |
| C | -2.41731 | 0.36243 | 0.01696  |
| C | -3.58311 | 1.04929 | -0.31635 |
| C | -3.59922 | 2.45119 | -0.31764 |
| C | -2.40852 | 3.11417 | 0.03054  |
| H | -4.46565 | 0.49033 | -0.61637 |
| H | -2.39833 | 4.19848 | 0.02097  |
| C | 3.59922  | 2.45119 | -0.31764 |
| C | 3.58311  | 1.04929 | -0.31636 |
| C | 2.41731  | 0.36242 | 0.01696  |
| C | 1.23886  | 1.02404 | 0.37123  |
| C | 1.24897  | 2.42930 | 0.38489  |
| C | 2.40853  | 3.11417 | 0.03053  |
| H | 4.46565  | 0.49033 | -0.61638 |
| H | 2.39834  | 4.19848 | 0.02097  |
| C | -1.24897 | 2.42931 | 0.38489  |

|   |          |          |          |
|---|----------|----------|----------|
| C | 0.00000  | 3.16803  | 0.86628  |
| C | 0.00000  | 0.25101  | 0.74557  |
| N | 4.74650  | 3.16014  | -0.64662 |
| N | -4.74650 | 3.16015  | -0.64661 |
| C | 0.00000  | 4.63740  | 0.45083  |
| H | 0.87353  | 5.15661  | 0.85933  |
| H | 0.00000  | 4.75870  | -0.63932 |
| H | -0.87352 | 5.15661  | 0.85933  |
| C | 0.00000  | 3.13316  | 2.40981  |
| H | -0.89196 | 3.64179  | 2.79818  |
| H | 0.00000  | 2.10782  | 2.79535  |
| H | 0.89197  | 3.64179  | 2.79817  |
| C | 4.66131  | 4.58254  | -0.87003 |
| H | 5.64544  | 4.96241  | -1.15569 |
| H | 3.94770  | 4.84891  | -1.66738 |
| H | 4.35827  | 5.11662  | 0.04145  |
| C | 5.89391  | 2.44127  | -1.14058 |
| H | 5.69027  | 1.89285  | -2.07630 |
| H | 6.70887  | 3.14450  | -1.32970 |
| H | 6.25566  | 1.71356  | -0.40014 |
| C | -4.66130 | 4.58254  | -0.87004 |
| H | -3.94769 | 4.84890  | -1.66739 |
| H | -5.64544 | 4.96242  | -1.15570 |
| H | -4.35825 | 5.11663  | 0.04143  |
| C | -5.89390 | 2.44127  | -1.14060 |
| H | -6.70887 | 3.14450  | -1.32972 |
| H | -5.69025 | 1.89287  | -2.07632 |
| H | -6.25566 | 1.71356  | -0.40017 |
| P | -2.28616 | -1.45642 | 0.03645  |
| P | 2.28616  | -1.45642 | 0.03645  |
| C | -3.29498 | -2.06284 | -1.40214 |
| C | -3.34205 | -3.58668 | -1.40062 |
| C | -2.74964 | -1.53300 | -2.72108 |
| H | -4.31487 | -1.67334 | -1.25894 |
| H | -3.79997 | -3.99785 | -0.49298 |
| H | -3.92081 | -3.95010 | -2.25898 |
| H | -2.32955 | -4.00328 | -1.48334 |
| H | -2.70678 | -0.43806 | -2.73747 |
| H | -1.73276 | -1.90334 | -2.89629 |
| H | -3.38802 | -1.86557 | -3.54984 |
| C | -3.25617 | -2.00467 | 1.53930  |



|   |          |          |          |
|---|----------|----------|----------|
| H | -6.28257 | 1.70722  | -0.32163 |
| P | -2.28708 | -1.46456 | 0.05200  |
| P | 2.28713  | -1.46451 | 0.05205  |
| C | -3.40073 | -2.07016 | -1.30804 |
| C | -3.44463 | -3.59430 | -1.29801 |
| C | -2.94367 | -1.54898 | -2.66396 |
| H | -4.40731 | -1.67522 | -1.10101 |
| H | -3.87868 | -3.99988 | -0.37645 |
| H | -4.04681 | -3.96213 | -2.13838 |
| H | -2.43168 | -4.00559 | -1.39941 |
| H | -2.84521 | -0.45717 | -2.67806 |
| H | -1.97310 | -1.98048 | -2.93707 |
| H | -3.66512 | -1.83773 | -3.43874 |
| C | -3.13432 | -2.02590 | 1.62040  |
| C | -4.63969 | -1.78802 | 1.63479  |
| C | -2.48859 | -1.36827 | 2.83452  |
| H | -2.92395 | -3.10650 | 1.65547  |
| H | -5.17026 | -2.32116 | 0.83775  |
| H | -5.06121 | -2.12532 | 2.59030  |
| H | -4.86444 | -0.71682 | 1.54059  |
| H | -1.41090 | -1.55991 | 2.87413  |
| H | -2.64582 | -0.28095 | 2.81960  |
| H | -2.94069 | -1.75756 | 3.75525  |
| C | 3.40082  | -2.07011 | -1.30794 |
| C | 2.94381  | -1.54894 | -2.66388 |
| C | 3.44475  | -3.59425 | -1.29790 |
| H | 4.40740  | -1.67516 | -1.10088 |
| H | 2.84535  | -0.45713 | -2.67800 |
| H | 3.66528  | -1.83770 | -3.43864 |
| H | 1.97324  | -1.98044 | -2.93700 |
| H | 3.87877  | -3.99983 | -0.37633 |
| H | 2.43180  | -4.00555 | -1.39932 |
| H | 4.04694  | -3.96208 | -2.13826 |
| C | 3.13434  | -2.02583 | 1.62049  |
| C | 2.48855  | -1.36820 | 2.83458  |
| C | 4.63970  | -1.78792 | 1.63492  |
| H | 2.92398  | -3.10643 | 1.65556  |
| H | 1.41087  | -1.55987 | 2.87417  |
| H | 2.94065  | -1.75748 | 3.75533  |
| H | 2.64576  | -0.28088 | 2.81966  |
| H | 5.17030  | -2.32105 | 0.83790  |

|    |          |          |          |
|----|----------|----------|----------|
| H  | 4.86443  | -0.71671 | 1.54071  |
| H  | 5.06119  | -2.12518 | 2.59044  |
| H  | -0.00002 | 0.12272  | 1.80898  |
| Ir | 0.00003  | -1.78408 | -0.09631 |
| H  | 0.00002  | -2.31118 | 1.44416  |
| H  | 0.00004  | -0.91003 | -1.55406 |
| H  | -0.00002 | -3.42772 | -0.30719 |
| H  | 0.00006  | -1.99699 | -1.74780 |

## 92

### Gas phase transition state 3-H<sub>4</sub> to Ir-H<sub>2</sub> (H<sub>2</sub> loss)

|   |          |         |          |
|---|----------|---------|----------|
| C | -1.24502 | 1.04420 | 0.24318  |
| C | -2.43349 | 0.36131 | -0.03337 |
| C | -3.60630 | 1.03696 | -0.35456 |
| C | -3.62128 | 2.43910 | -0.41933 |
| C | -2.42786 | 3.11720 | -0.11640 |
| H | -4.50404 | 0.46986 | -0.58588 |
| H | -2.42586 | 4.20097 | -0.14455 |
| C | 3.62132  | 2.43905 | -0.41935 |
| C | 3.60632  | 1.03691 | -0.35457 |
| C | 2.43350  | 0.36127 | -0.03336 |
| C | 1.24505  | 1.04418 | 0.24318  |
| C | 1.25253  | 2.44639 | 0.21738  |
| C | 2.42791  | 3.11716 | -0.11643 |
| H | 4.50405  | 0.46979 | -0.58589 |
| H | 2.42592  | 4.20094 | -0.14458 |
| C | -1.25248 | 2.44641 | 0.21739  |
| C | 0.00003  | 3.20341 | 0.65984  |
| C | 0.00001  | 0.28184 | 0.60579  |
| N | 4.77346  | 3.12836 | -0.77188 |
| N | -4.77341 | 3.12843 | -0.77184 |
| C | 0.00004  | 4.65219 | 0.17640  |
| H | 0.87285  | 5.19119 | 0.55943  |
| H | 0.00003  | 4.72065 | -0.91815 |
| H | -0.87277 | 5.19120 | 0.55944  |
| C | 0.00004  | 3.23355 | 2.20374  |
| H | -0.89211 | 3.75651 | 2.57213  |
| H | 0.00003  | 2.22325 | 2.62933  |
| H | 0.89219  | 3.75650 | 2.57212  |
| C | 4.80334  | 4.56491 | -0.64451 |



|   |          |          |          |                                   |          |          |          |
|---|----------|----------|----------|-----------------------------------|----------|----------|----------|
| H | 5.78017  | 4.93538  | -0.96545 | H                                 | 2.60297  | -0.61609 | -2.76924 |
| H | 4.04910  | 5.03702  | -1.28818 | H                                 | 3.34407  | -2.05283 | -3.51031 |
| H | 4.62798  | 4.91101  | 0.38846  | H                                 | 1.71255  | -2.14173 | -2.80411 |
| C | 6.02368  | 2.40984  | -0.82265 | H                                 | 3.99146  | -3.94063 | -0.33962 |
| H | 6.01530  | 1.64386  | -1.61037 | H                                 | 2.47168  | -4.10910 | -1.23553 |
| H | 6.83268  | 3.10629  | -1.05626 | H                                 | 4.01115  | -4.01621 | -2.10804 |
| H | 6.26744  | 1.90787  | 0.12970  | C                                 | 3.21399  | -1.95580 | 1.59082  |
| C | -4.80326 | 4.56499  | -0.64448 | C                                 | 2.50939  | -1.36920 | 2.80793  |
| H | -4.04903 | 5.03708  | -1.28817 | C                                 | 4.69567  | -1.60524 | 1.59514  |
| H | -5.78010 | 4.93547  | -0.96542 | H                                 | 3.08710  | -3.05001 | 1.61735  |
| H | -4.62789 | 4.91109  | 0.38847  | H                                 | 1.45391  | -1.66741 | 2.83020  |
| C | -6.02364 | 2.40993  | -0.82264 | H                                 | 2.98865  | -1.71812 | 3.73132  |
| H | -6.83264 | 3.10639  | -1.05624 | H                                 | 2.56303  | -0.27120 | 2.80007  |
| H | -6.01527 | 1.64397  | -1.61038 | H                                 | 5.24509  | -2.05363 | 0.75837  |
| H | -6.26742 | 1.90794  | 0.12970  | H                                 | 4.83839  | -0.51688 | 1.55234  |
| P | -2.28146 | -1.46097 | 0.05124  | H                                 | 5.16395  | -1.95970 | 2.52253  |
| P | 2.28144  | -1.46100 | 0.05126  | H                                 | 0.00001  | 0.13523  | 1.70404  |
| C | -3.31849 | -2.11191 | -1.34827 | Ir                                | -0.00002 | -1.74541 | 0.02634  |
| C | -3.45790 | -3.62652 | -1.24424 | H                                 | -0.00004 | -3.06733 | 1.15502  |
| C | -2.71134 | -1.70339 | -2.68421 | H                                 | -0.00000 | -0.89044 | -1.37013 |
| H | -4.31556 | -1.65345 | -1.25450 | H                                 | -0.00007 | -4.11750 | -1.05290 |
| H | -3.99161 | -3.94050 | -0.33964 | H                                 | 0.00025  | -4.16128 | -1.80345 |
| H | -4.01122 | -4.01614 | -2.10806 |                                   |          |          |          |
| H | -2.47179 | -4.10909 | -1.23548 | <b>90</b>                         |          |          |          |
| H | -2.60285 | -0.61610 | -2.76928 | <b>Gas phase Ir-H<sub>2</sub></b> |          |          |          |
| H | -1.71250 | -2.14179 | -2.80409 | C                                 | -1.24853 | 1.03124  | 0.37094  |
| H | -3.34400 | -2.05281 | -3.51036 | C                                 | -2.43781 | 0.36080  | 0.05781  |
| C | -3.21403 | -1.95579 | 1.59078  | C                                 | -3.61271 | 1.04789  | -0.24292 |
| C | -4.69573 | -1.60530 | 1.59504  | C                                 | -3.62836 | 2.45011  | -0.26048 |
| C | -2.50949 | -1.36916 | 2.80790  | C                                 | -2.42661 | 3.11725  | 0.03774  |
| H | -3.08709 | -3.05000 | 1.61732  | H                                 | -4.50509 | 0.48799  | -0.51046 |
| H | -5.24509 | -2.05375 | 0.75826  | H                                 | -2.41795 | 4.20155  | 0.01579  |
| H | -5.16402 | -1.95976 | 2.52242  | C                                 | 3.62834  | 2.45014  | -0.26048 |
| H | -4.83850 | -0.51695 | 1.55221  | C                                 | 3.61270  | 1.04792  | -0.24292 |
| H | -1.45400 | -1.66733 | 2.83020  | C                                 | 2.43780  | 0.36083  | 0.05782  |
| H | -2.56316 | -0.27116 | 2.80003  | C                                 | 1.24851  | 1.03125  | 0.37094  |
| H | -2.98876 | -1.71809 | 3.73128  | C                                 | 1.25676  | 2.43649  | 0.36734  |
| C | 3.31848  | -2.11196 | -1.34823 | C                                 | 2.42658  | 3.11727  | 0.03775  |
| C | 2.71140  | -1.70339 | -2.68418 | H                                 | 4.50508  | 0.48804  | -0.51046 |
| C | 3.45781  | -3.62659 | -1.24423 | H                                 | 2.41789  | 4.20157  | 0.01580  |
| H | 4.31558  | -1.65356 | -1.25442 | C                                 | -1.25679 | 2.43648  | 0.36734  |

|    |          |          |          |                                   |          |          |          |
|----|----------|----------|----------|-----------------------------------|----------|----------|----------|
| C  | -0.00002 | 3.17927  | 0.82700  | C                                 | -3.27218 | -2.11333 | 1.45662  |
| C  | -0.00000 | 0.25998  | 0.69315  | C                                 | -4.74609 | -1.73329 | 1.45450  |
| N  | 4.78726  | 3.15664  | -0.55916 | C                                 | -2.59409 | -1.67786 | 2.75055  |
| N  | -4.78728 | 3.15663  | -0.55916 | H                                 | -3.17102 | -3.20636 | 1.36351  |
| C  | -0.00001 | 4.64175  | 0.38785  | H                                 | -5.27126 | -2.06663 | 0.55098  |
| H  | 0.87318  | 5.16862  | 0.78695  | H                                 | -5.25442 | -2.18570 | 2.31594  |
| H  | -0.00002 | 4.74441  | -0.70429 | H                                 | -4.86638 | -0.64502 | 1.53692  |
| H  | -0.87318 | 5.16864  | 0.78698  | H                                 | -1.54734 | -2.00608 | 2.78114  |
| C  | -0.00002 | 3.16330  | 2.37080  | H                                 | -2.61020 | -0.58347 | 2.84934  |
| H  | -0.89249 | 3.67466  | 2.75466  | H                                 | -3.11648 | -2.09837 | 3.61925  |
| H  | -0.00002 | 2.14000  | 2.76279  | C                                 | 3.22646  | -1.99361 | -1.49458 |
| H  | 0.89246  | 3.67466  | 2.75466  | C                                 | 2.55179  | -1.42610 | -2.73784 |
| C  | 4.70272  | 4.57149  | -0.82676 | C                                 | 3.31669  | -3.51329 | -1.55999 |
| H  | 5.69413  | 4.94867  | -1.09025 | H                                 | 4.24129  | -1.57286 | -1.41369 |
| H  | 4.01464  | 4.81111  | -1.65471 | H                                 | 2.49841  | -0.33174 | -2.70974 |
| H  | 4.36718  | 5.13010  | 0.05815  | H                                 | 3.10451  | -1.71993 | -3.63949 |
| C  | 5.94930  | 2.43171  | -1.00777 | H                                 | 1.52577  | -1.80796 | -2.82400 |
| H  | 5.78005  | 1.87916  | -1.94825 | H                                 | 3.89171  | -3.93842 | -0.72867 |
| H  | 6.77355  | 3.13135  | -1.16843 | H                                 | 2.31401  | -3.96010 | -1.53939 |
| H  | 6.27990  | 1.70655  | -0.25076 | H                                 | 3.80433  | -3.82473 | -2.49242 |
| C  | -4.70269 | 4.57147  | -0.82674 | C                                 | 3.27219  | -2.11331 | 1.45663  |
| H  | -4.01460 | 4.81108  | -1.65469 | C                                 | 2.59409  | -1.67785 | 2.75056  |
| H  | -5.69409 | 4.94870  | -1.09022 | C                                 | 4.74610  | -1.73326 | 1.45453  |
| H  | -4.36712 | 5.13005  | 0.05819  | H                                 | 3.17103  | -3.20634 | 1.36352  |
| C  | -5.94936 | 2.43174  | -1.00774 | H                                 | 1.54734  | -2.00607 | 2.78115  |
| H  | -6.77358 | 3.13142  | -1.16840 | H                                 | 3.11647  | -2.09836 | 3.61927  |
| H  | -5.78014 | 1.87917  | -1.94821 | H                                 | 2.61019  | -0.58345 | 2.84936  |
| H  | -6.27998 | 1.70660  | -0.25071 | H                                 | 5.27128  | -2.06659 | 0.55100  |
| P  | -2.27998 | -1.46633 | 0.01466  | H                                 | 4.86638  | -0.64498 | 1.53696  |
| P  | 2.27999  | -1.46631 | 0.01467  | H                                 | 5.25443  | -2.18567 | 2.31597  |
| Ir | 0.00001  | -1.79972 | 0.06350  | H                                 | 0.00001  | -2.90232 | -1.09225 |
| C  | -3.22644 | -1.99363 | -1.49460 | H                                 | -0.00000 | 0.05330  | 1.78687  |
| C  | -3.31664 | -3.51332 | -1.56002 | H                                 | 0.00001  | -3.38601 | 0.36535  |
| C  | -2.55179 | -1.42610 | -2.73785 |                                   |          |          |          |
| H  | -4.24127 | -1.57291 | -1.41370 | <b>90</b>                         |          |          |          |
| H  | -3.89165 | -3.93847 | -0.72871 | <b>Gas phase Ir-H<sub>3</sub></b> |          |          |          |
| H  | -3.80427 | -3.82476 | -2.49246 | C                                 | 1.23487  | 1.02696  | -0.02216 |
| H  | -2.31396 | -3.96011 | -1.53942 | C                                 | 2.46612  | 0.33542  | -0.04615 |
| H  | -2.49843 | -0.33174 | -2.70974 | C                                 | 3.67791  | 0.99084  | -0.12353 |
| H  | -1.52575 | -1.80794 | -2.82401 | C                                 | 3.72211  | 2.40203  | -0.14089 |
| H  | -3.10449 | -1.71994 | -3.63950 | C                                 | 2.49924  | 3.08897  | -0.09665 |

|   |          |          |          |    |          |          |          |
|---|----------|----------|----------|----|----------|----------|----------|
| H | 4.59835  | 0.41601  | -0.18094 | Ir | -0.00000 | -1.74700 | -0.01833 |
| H | 2.51023  | 4.17532  | -0.10363 | H  | -0.00000 | -3.42084 | -0.23064 |
| C | -3.72208 | 2.40206  | -0.14104 | H  | 0.00003  | -1.96368 | -1.65718 |
| C | -3.67789 | 0.99087  | -0.12369 | H  | -0.00004 | -2.41283 | 1.49866  |
| C | -2.46611 | 0.33544  | -0.04629 | C  | 3.11834  | -1.98012 | 1.64687  |
| C | -1.23485 | 1.02698  | -0.02225 | C  | 2.55950  | -1.15611 | 2.80183  |
| C | -1.26914 | 2.43200  | -0.05459 | C  | 4.64084  | -1.93027 | 1.64588  |
| C | -2.49921 | 3.08898  | -0.09674 | H  | 2.78570  | -3.02252 | 1.77294  |
| H | -4.59833 | 0.41604  | -0.18109 | H  | 1.46379  | -1.16907 | 2.80974  |
| H | -2.51020 | 4.17534  | -0.10367 | H  | 2.91898  | -1.55671 | 3.75801  |
| C | 1.26917  | 2.43198  | -0.05449 | H  | 2.89201  | -0.11199 | 2.73121  |
| C | 0.00003  | 3.27517  | -0.03219 | H  | 5.09522  | -2.55577 | 0.86924  |
| C | 0.00001  | 0.24000  | 0.01675  | H  | 5.00364  | -0.90143 | 1.51635  |
| N | -4.92518 | 3.07251  | -0.19866 | H  | 5.02140  | -2.28195 | 2.61371  |
| N | 4.92520  | 3.07248  | -0.19844 | C  | 3.36603  | -2.15588 | -1.29823 |
| C | -0.00001 | 4.11806  | 1.25695  | C  | 2.94435  | -1.60724 | -2.65459 |
| H | -0.88569 | 4.76152  | 1.31028  | C  | 3.31257  | -3.67933 | -1.28369 |
| H | -0.00007 | 3.46647  | 2.13868  | H  | 4.39196  | -1.81924 | -1.08003 |
| H | 0.88571  | 4.76147  | 1.31036  | H  | 2.99458  | -0.51276 | -2.69029 |
| C | 0.00012  | 4.20047  | -1.26292 | H  | 3.59946  | -2.00535 | -3.44012 |
| H | 0.88283  | 4.84890  | -1.27569 | H  | 1.91352  | -1.90369 | -2.88303 |
| H | 0.00006  | 3.60910  | -2.18578 | H  | 3.66054  | -4.10652 | -0.33504 |
| H | -0.88243 | 4.84910  | -1.27570 | H  | 2.28172  | -4.02046 | -1.44251 |
| C | -4.94754 | 4.51428  | -0.15329 | H  | 3.93952  | -4.08972 | -2.08550 |
| H | -5.98031 | 4.86330  | -0.22193 | C  | -3.11843 | -1.98005 | 1.64673  |
| H | -4.51615 | 4.91157  | 0.77916  | C  | -4.64094 | -1.93025 | 1.64561  |
| H | -4.39223 | 4.95420  | -0.99408 | C  | -2.55971 | -1.15596 | 2.80169  |
| C | -6.16212 | 2.33138  | -0.12975 | H  | -2.78577 | -3.02244 | 1.77286  |
| H | -6.23720 | 1.73036  | 0.79061  | H  | -5.09523 | -2.55576 | 0.86893  |
| H | -7.00288 | 3.02848  | -0.14366 | H  | -5.02157 | -2.28192 | 2.61341  |
| H | -6.28127 | 1.65128  | -0.98552 | H  | -5.00375 | -0.90141 | 1.51602  |
| C | 4.94757  | 4.51426  | -0.15370 | H  | -1.46401 | -1.16890 | 2.80969  |
| H | 4.51600  | 4.91193  | 0.77850  | H  | -2.89223 | -0.11186 | 2.73098  |
| H | 5.98035  | 4.86325  | -0.22225 | H  | -2.91927 | -1.55652 | 3.75786  |
| H | 4.39241  | 4.95386  | -0.99477 | C  | -3.36600 | -2.15586 | -1.29836 |
| C | 6.16216  | 2.33133  | -0.13004 | C  | -3.31257 | -3.67931 | -1.28379 |
| H | 7.00291  | 3.02845  | -0.14377 | C  | -2.94426 | -1.60726 | -2.65471 |
| H | 6.23737  | 1.72998  | 0.79008  | H  | -4.39193 | -1.81921 | -1.08019 |
| H | 6.28121  | 1.65155  | -0.98608 | H  | -3.66058 | -4.10648 | -0.33513 |
| P | 2.27499  | -1.49006 | 0.05012  | H  | -3.93950 | -4.08971 | -2.08560 |
| P | -2.27499 | -1.49004 | 0.05002  | H  | -2.28172 | -4.02046 | -1.44256 |

|                       |          |          |          |    |          |          |          |
|-----------------------|----------|----------|----------|----|----------|----------|----------|
| H                     | -2.99448 | -0.51278 | -2.69044 | H  | 6.24900  | 1.72051  | 0.74645  |
| H                     | -1.91344 | -1.90373 | -2.88312 | C  | -4.94357 | 4.50924  | -0.16017 |
| H                     | -3.59937 | -2.00537 | -3.44025 | H  | -4.37947 | 4.95446  | -0.99223 |
| <b>88</b>             |          |          |          | H  | -5.97563 | 4.85844  | -0.23762 |
| <b>Gas phase Ir-H</b> |          |          |          | H  | -4.52246 | 4.90067  | 0.77929  |
| C                     | -1.23364 | 1.01904  | 0.00789  | C  | -6.15913 | 2.32665  | -0.16900 |
| C                     | -2.46653 | 0.32728  | -0.03336 | H  | -6.99909 | 3.02443  | -0.19262 |
| C                     | -3.67574 | 0.98508  | -0.13287 | H  | -6.26433 | 1.65147  | -1.03026 |
| C                     | -3.71943 | 2.39582  | -0.14463 | H  | -6.24899 | 1.72049  | 0.74646  |
| C                     | -2.49675 | 3.08301  | -0.08161 | P  | -2.26390 | -1.50120 | 0.03639  |
| H                     | -4.59560 | 0.41135  | -0.20459 | P  | 2.26390  | -1.50120 | 0.03639  |
| H                     | -2.50805 | 4.16930  | -0.08328 | Ir | 0.00000  | -1.73757 | 0.00958  |
| C                     | 3.71943  | 2.39583  | -0.14463 | C  | -3.30301 | -2.12982 | -1.37097 |
| C                     | 3.67573  | 0.98509  | -0.13287 | C  | -3.39404 | -3.64992 | -1.31237 |
| C                     | 2.46652  | 0.32728  | -0.03335 | C  | -2.67255 | -1.67230 | -2.68105 |
| C                     | 1.23363  | 1.01904  | 0.00789  | H  | -4.31046 | -1.69305 | -1.27911 |
| C                     | 1.26846  | 2.42569  | -0.02842 | H  | -3.93846 | -4.00647 | -0.42955 |
| C                     | 2.49674  | 3.08301  | -0.08161 | H  | -3.91350 | -4.03393 | -2.19972 |
| H                     | 4.59560  | 0.41136  | -0.20459 | H  | -2.38753 | -4.08841 | -1.28841 |
| H                     | 2.50804  | 4.16931  | -0.08328 | H  | -2.60861 | -0.57940 | -2.74643 |
| C                     | -1.26847 | 2.42569  | -0.02843 | H  | -1.65268 | -2.07147 | -2.76750 |
| C                     | -0.00000 | 3.26814  | 0.01336  | H  | -3.25959 | -2.03291 | -3.53574 |
| C                     | -0.00000 | 0.22901  | 0.06696  | C  | -3.15263 | -2.04494 | 1.58504  |
| N                     | 4.92049  | 3.06752  | -0.21368 | C  | -4.65420 | -1.79785 | 1.63087  |
| N                     | -4.92050 | 3.06751  | -0.21368 | C  | -2.45955 | -1.43057 | 2.79582  |
| C                     | 0.00001  | 4.22833  | -1.19010 | H  | -2.96128 | -3.13018 | 1.59259  |
| H                     | 0.88165  | 4.87793  | -1.18483 | H  | -5.18502 | -2.21460 | 0.76617  |
| H                     | -0.00000 | 3.66414  | -2.12979 | H  | -5.08273 | -2.25561 | 2.53218  |
| H                     | -0.88162 | 4.87795  | -1.18483 | H  | -4.87181 | -0.72259 | 1.68190  |
| C                     | -0.00000 | 4.07372  | 1.32650  | H  | -1.38483 | -1.64834 | 2.78911  |
| H                     | -0.88657 | 4.71446  | 1.39770  | H  | -2.57939 | -0.33835 | 2.79946  |
| H                     | -0.00001 | 3.39643  | 2.18874  | H  | -2.89488 | -1.81827 | 3.72592  |
| H                     | 0.88658  | 4.71445  | 1.39771  | C  | 3.30301  | -2.12982 | -1.37097 |
| C                     | 4.94355  | 4.50925  | -0.16017 | C  | 2.67254  | -1.67232 | -2.68105 |
| H                     | 5.97561  | 4.85846  | -0.23762 | C  | 3.39406  | -3.64991 | -1.31236 |
| H                     | 4.37944  | 4.95447  | -0.99223 | H  | 4.31045  | -1.69303 | -1.27912 |
| H                     | 4.52244  | 4.90069  | 0.77929  | H  | 2.60858  | -0.57942 | -2.74644 |
| C                     | 6.15913  | 2.32668  | -0.16901 | H  | 3.25958  | -2.03292 | -3.53574 |
| H                     | 6.26433  | 1.65150  | -1.03028 | H  | 1.65267  | -2.07150 | -2.76750 |
| H                     | 6.99908  | 3.02447  | -0.19262 | H  | 3.93849  | -4.00645 | -0.42954 |
|                       |          |          |          | H  | 2.38755  | -4.08842 | -1.28839 |

|                        |          |          |          |    |          |          |          |
|------------------------|----------|----------|----------|----|----------|----------|----------|
| H                      | 3.91351  | -4.03392 | -2.19971 | H  | 0.00142  | 2.05616  | 2.78717  |
| C                      | 3.15263  | -2.04494 | 1.58504  | H  | 0.89376  | 3.59018  | 2.79925  |
| C                      | 2.45958  | -1.43054 | 2.79582  | C  | 4.67654  | 4.55052  | -0.81166 |
| C                      | 4.65421  | -1.79789 | 1.63085  | H  | 5.66179  | 4.92779  | -1.09652 |
| H                      | 2.96126  | -3.13017 | 1.59260  | H  | 3.95911  | 4.84889  | -1.59360 |
| H                      | 1.38486  | -1.64828 | 2.78912  | H  | 4.38718  | 5.06032  | 0.11864  |
| H                      | 2.89490  | -1.81824 | 3.72592  | C  | 5.91010  | 2.40505  | -1.09275 |
| H                      | 2.57945  | -0.33833 | 2.79945  | H  | 5.73081  | 1.84391  | -2.02533 |
| H                      | 5.18501  | -2.21466 | 0.76615  | H  | 6.72327  | 3.11217  | -1.27436 |
| H                      | 4.87184  | -0.72262 | 1.68188  | H  | 6.26078  | 1.68843  | -0.33569 |
| H                      | 5.08273  | -2.25565 | 2.53216  | C  | -4.67294 | 4.55093  | -0.81826 |
| H                      | 0.00000  | -3.42805 | -0.33673 | H  | -3.95787 | 4.84138  | -1.60544 |
|                        |          |          |          | H  | -5.65836 | 4.92932  | -1.10115 |
| <b>88</b>              |          |          |          | H  | -4.37816 | 5.06635  | 0.10704  |
| <b>Gas phase Ir-[]</b> |          |          |          | C  | -5.90769 | 2.40719  | -1.09607 |
| C                      | -1.24092 | 0.98324  | 0.36662  | H  | -6.72193 | 3.11372  | -1.27538 |
| C                      | -2.42348 | 0.32047  | 0.02637  | H  | -5.72477 | 1.85169  | -2.03143 |
| C                      | -3.58436 | 1.01142  | -0.31109 | H  | -6.25886 | 1.68581  | -0.34401 |
| C                      | -3.59972 | 2.41378  | -0.30848 | P  | -2.26958 | -1.49915 | 0.01485  |
| C                      | -2.40870 | 3.07532  | 0.04070  | P  | 2.26887  | -1.49991 | 0.01390  |
| H                      | -4.46880 | 0.45394  | -0.60798 | Ir | -0.00040 | -1.77580 | 0.11189  |
| H                      | -2.39939 | 4.15961  | 0.03997  | C  | -3.20506 | -2.04593 | -1.49966 |
| C                      | 3.59967  | 2.41257  | -0.31164 | C  | -3.24722 | -3.56812 | -1.55912 |
| C                      | 3.58406  | 1.01018  | -0.31373 | C  | -2.54122 | -1.46934 | -2.74376 |
| C                      | 2.42319  | 0.31967  | 0.02459  | H  | -4.23354 | -1.65886 | -1.42625 |
| C                      | 1.24104  | 0.98285  | 0.36554  | H  | -3.77508 | -4.01169 | -0.70615 |
| C                      | 1.24730  | 2.38799  | 0.38207  | H  | -3.75350 | -3.90328 | -2.47337 |
| C                      | 2.40922  | 3.07461  | 0.03868  | H  | -2.22795 | -3.97893 | -1.57530 |
| H                      | 4.46833  | 0.45250  | -0.61080 | H  | -2.54296 | -0.37353 | -2.73686 |
| H                      | 2.40045  | 4.15892  | 0.03810  | H  | -1.49425 | -1.79716 | -2.80109 |
| C                      | -1.24672 | 2.38836  | 0.38323  | H  | -3.06248 | -1.80885 | -3.64850 |
| C                      | 0.00062  | 3.12615  | 0.86501  | C  | -3.31996 | -2.09271 | 1.44651  |
| C                      | 0.00010  | 0.19992  | 0.72661  | C  | -4.79903 | -1.73859 | 1.38480  |
| N                      | 4.74590  | 3.12118  | -0.63597 | C  | -2.68817 | -1.59369 | 2.74097  |
| N                      | -4.74646 | 3.12309  | -0.63101 | H  | -3.20508 | -3.18826 | 1.40843  |
| C                      | 0.00064  | 4.59705  | 0.45499  | H  | -5.29297 | -2.12380 | 0.48422  |
| H                      | 0.87429  | 5.11469  | 0.86498  | H  | -5.32556 | -2.15787 | 2.25238  |
| H                      | 0.00015  | 4.72220  | -0.63468 | H  | -4.94016 | -0.64987 | 1.41255  |
| H                      | -0.87248 | 5.11495  | 0.86579  | H  | -1.62964 | -1.87939 | 2.79790  |
| C                      | 0.00135  | 3.08420  | 2.40846  | H  | -2.74561 | -0.49790 | 2.80356  |
| H                      | -0.89055 | 3.59040  | 2.80013  | H  | -3.21312 | -2.00515 | 3.61263  |

|   |         |          |          |   |          |         |          |
|---|---------|----------|----------|---|----------|---------|----------|
| C | 3.20370 | -2.04763 | -1.50066 | C | 0.00000  | 3.17726 | 0.52669  |
| C | 2.53943 | -1.47167 | -2.74482 | C | 0.00000  | 0.26253 | 0.31731  |
| C | 3.24571 | -3.56985 | -1.55932 | N | 4.84094  | 3.08696 | -0.65449 |
| H | 4.23224 | -1.66060 | -1.42785 | N | -4.84093 | 3.08697 | -0.65448 |
| H | 2.54094 | -0.37585 | -2.73836 | C | 0.00001  | 4.61317 | 0.00465  |
| H | 3.06053 | -1.81143 | -3.64956 | H | 0.87162  | 5.16509 | 0.37124  |
| H | 1.49252 | -1.79972 | -2.80176 | H | 0.00000  | 4.64891 | -1.09144 |
| H | 3.77408 | -4.01301 | -0.70644 | H | -0.87160 | 5.16509 | 0.37124  |
| H | 2.22641 | -3.98062 | -1.57462 | C | 0.00001  | 3.23678 | 2.07173  |
| H | 3.75137 | -3.90556 | -2.47371 | H | -0.89325 | 3.76457 | 2.43099  |
| C | 3.31971 | -2.09302 | 1.44544  | H | 0.00001  | 2.22836 | 2.50193  |
| C | 2.68842 | -1.59348 | 2.73995  | H | 0.89326  | 3.76457 | 2.43099  |
| C | 4.79878 | -1.73901 | 1.38306  | C | 4.87318  | 4.51615 | -0.46111 |
| H | 3.20475 | -3.18858 | 1.40781  | H | 5.86540  | 4.89308 | -0.72288 |
| H | 1.62991 | -1.87912 | 2.79740  | H | 4.15199  | 5.02090 | -1.11718 |
| H | 3.21370 | -2.00460 | 3.61157  | H | 4.65248  | 4.81979 | 0.57725  |
| H | 2.74591 | -0.49766 | 2.80208  | C | 6.08913  | 2.36648 | -0.60247 |
| H | 5.29239 | -2.12461 | 0.48246  | H | 6.12979  | 1.58272 | -1.37120 |
| H | 4.93999 | -0.65028 | 1.41030  | H | 6.91432  | 3.05545 | -0.80043 |
| H | 5.32559 | -2.15797 | 2.25064  | H | 6.26942  | 1.88478 | 0.37549  |
| H | 0.00047 | 0.04300  | 1.82780  | C | -4.87317 | 4.51616 | -0.46113 |

88

**Gas Phase transition state for Ir-H to Ir-[]  
(1,2-hydride shift)**

|   |          |         |          |    |          |          |          |
|---|----------|---------|----------|----|----------|----------|----------|
| C | -1.23410 | 0.99536 | 0.14137  | H  | -4.15197 | 5.02090  | -1.11720 |
| C | -2.46024 | 0.31793 | -0.03171 | H  | -5.86539 | 4.89309  | -0.72291 |
| C | -3.64355 | 0.99346 | -0.30158 | H  | -4.65247 | 4.81981  | 0.57723  |
| C | -3.66620 | 2.39477 | -0.36826 | C  | -6.08913 | 2.36649  | -0.60246 |
| C | -2.45483 | 3.07129 | -0.12710 | H  | -6.91431 | 3.05546  | -0.80042 |
| H | -4.55239 | 0.42519 | -0.47916 | H  | -6.12979 | 1.58272  | -1.37118 |
| H | -2.46094 | 4.15588 | -0.13209 | H  | -6.26941 | 1.88480  | 0.37550  |
| C | 3.66620  | 2.39477 | -0.36827 | P  | -2.29872 | -1.49655 | 0.03106  |
| C | 3.64355  | 0.99346 | -0.30160 | P  | 2.29872  | -1.49656 | 0.03102  |
| C | 2.46024  | 0.31792 | -0.03173 | Ir | 0.00000  | -1.73455 | 0.22319  |
| C | 1.23410  | 0.99536 | 0.14136  | C  | -3.11286 | -2.07606 | -1.53880 |
| C | 1.25702  | 2.41299 | 0.11832  | C  | -3.19850 | -3.59627 | -1.57859 |
| C | 2.45483  | 3.07129 | -0.12710 | C  | -2.34639 | -1.53825 | -2.74051 |
| H | 4.55239  | 0.42519 | -0.47919 | H  | -4.12950 | -1.65163 | -1.54855 |
| H | 2.46095  | 4.15588 | -0.13209 | H  | -3.80054 | -4.01034 | -0.76067 |
| C | -1.25701 | 2.41300 | 0.11832  | H  | -3.65008 | -3.92787 | -2.52242 |
|   |          |         |          | H  | -2.19377 | -4.03603 | -1.51496 |
|   |          |         |          | H  | -2.29095 | -0.44386 | -2.73475 |
|   |          |         |          | H  | -1.31956 | -1.92806 | -2.74306 |
|   |          |         |          | H  | -2.83146 | -1.85310 | -3.67328 |

|   |          |          |          |   |          |         |          |
|---|----------|----------|----------|---|----------|---------|----------|
| C | -3.41023 | -2.09647 | 1.40599  | C | 3.61590  | 2.45049 | -0.30432 |
| C | -4.89618 | -1.80414 | 1.23932  | C | 3.59432  | 1.04725 | -0.29130 |
| C | -2.90077 | -1.54856 | 2.73492  | C | 2.42301  | 0.36506 | 0.03448  |
| H | -3.25388 | -3.18791 | 1.39576  | C | 1.24276  | 1.03696 | 0.37262  |
| H | -5.30555 | -2.16800 | 0.28923  | C | 1.25419  | 2.44269 | 0.36522  |
| H | -5.46332 | -2.28477 | 2.04699  | C | 2.42041  | 3.12058 | 0.01740  |
| H | -5.08856 | -0.72546 | 1.30539  | H | 4.47956  | 0.48431 | -0.57568 |
| H | -1.86381 | -1.84541 | 2.92373  | H | 2.41379  | 4.20467 | -0.00730 |
| H | -2.94090 | -0.45072 | 2.74166  | C | -1.25418 | 2.44269 | 0.36514  |
| H | -3.52478 | -1.91202 | 3.56138  | C | -0.00001 | 3.19361 | 0.82105  |
| C | 3.11282  | -2.07605 | -1.53886 | C | -0.00001 | 0.28113 | 0.75670  |
| C | 2.34634  | -1.53821 | -2.74055 | N | 4.76824  | 3.15081 | -0.62256 |
| C | 3.19844  | -3.59625 | -1.57867 | N | -4.76812 | 3.15079 | -0.62294 |
| H | 4.12947  | -1.65163 | -1.54862 | C | 0.00003  | 4.64885 | 0.35765  |
| H | 2.29092  | -0.44382 | -2.73478 | H | 0.87237  | 5.18401 | 0.74783  |
| H | 2.83139  | -1.85306 | -3.67333 | H | 0.00005  | 4.73672 | -0.73596 |
| H | 1.31950  | -1.92799 | -2.74308 | H | -0.87230 | 5.18405 | 0.74781  |
| H | 3.80049  | -4.01034 | -0.76077 | C | -0.00005 | 3.20638 | 2.36429  |
| H | 2.19371  | -4.03601 | -1.51503 | H | -0.89090 | 3.72678 | 2.74027  |
| H | 3.65001  | -3.92784 | -2.52251 | H | -0.00009 | 2.19374 | 2.78367  |
| C | 3.41025  | -2.09650 | 1.40593  | H | 0.89080  | 3.72674 | 2.74032  |
| C | 2.90082  | -1.54860 | 2.73487  | C | 4.70602  | 4.57938 | -0.81517 |
| C | 4.89620  | -1.80418 | 1.23923  | H | 5.70053  | 4.95236 | -1.07236 |
| H | 3.25389  | -3.18793 | 1.39568  | H | 4.01535  | 4.87438 | -1.62235 |
| H | 1.86386  | -1.84545 | 2.92370  | H | 4.39211  | 5.09844 | 0.10151  |
| H | 3.52484  | -1.91208 | 3.56132  | C | 5.92276  | 2.42812 | -1.09619 |
| H | 2.94096  | -0.45077 | 2.74163  | H | 5.73117  | 1.87563 | -2.03154 |
| H | 5.30555  | -2.16803 | 0.28913  | H | 6.73993  | 3.12978 | -1.28143 |
| H | 5.08859  | -0.72550 | 1.30532  | H | 6.27891  | 1.70499 | -0.34826 |
| H | 5.46335  | -2.28483 | 2.04689  | C | -4.70611 | 4.57947 | -0.81474 |
| H | 0.00001  | -0.96441 | 1.64268  | H | -4.01533 | 4.87499 | -1.62162 |

**92**

**Benzene solvent 1-H<sub>4</sub> (tetrahydride)**

|   |          |         |          |   |          |          |          |
|---|----------|---------|----------|---|----------|----------|----------|
| C | -1.24276 | 1.03696 | 0.37256  | C | -5.92282 | 2.42810  | -1.09610 |
| C | -2.42299 | 0.36505 | 0.03438  | H | -6.73979 | 3.12985  | -1.28186 |
| C | -3.59429 | 1.04723 | -0.29146 | H | -5.73131 | 1.87502  | -2.03111 |
| C | -3.61585 | 2.45048 | -0.30456 | H | -6.27918 | 1.70547  | -0.34777 |
| C | -2.42038 | 3.12059 | 0.01725  | P | -2.29539 | -1.46020 | 0.03718  |
| H | -4.47955 | 0.48431 | -0.57580 | P | 2.29540  | -1.46019 | 0.03721  |
| H | -2.41379 | 4.20467 | -0.00746 | C | -3.28382 | -2.04713 | -1.42151 |
|   |          |         |          | C | -3.33888 | -3.56999 | -1.43611 |

|    |          |          |          |                                                   |          |          |          |
|----|----------|----------|----------|---------------------------------------------------|----------|----------|----------|
| C  | -2.71420 | -1.50883 | -2.72611 | H                                                 | 0.00001  | -0.89865 | -1.34794 |
| H  | -4.30206 | -1.64943 | -1.29185 | H                                                 | 0.00010  | -3.39959 | 0.38328  |
| H  | -3.83090 | -3.98856 | -0.54975 | H                                                 | 0.00003  | -2.77526 | -1.25976 |
| H  | -3.89236 | -3.92027 | -2.31684 |                                                   |          |          |          |
| H  | -2.32708 | -3.99353 | -1.48771 | <b>92</b>                                         |          |          |          |
| H  | -2.64326 | -0.41471 | -2.72941 | <b>Benzene solvent 2-H<sub>4</sub> (dihydride</b> |          |          |          |
| H  | -1.70901 | -1.90761 | -2.90836 | <b>dihydrogen)</b>                                |          |          |          |
| H  | -3.35566 | -1.80942 | -3.56488 | C                                                 | -1.23676 | 1.03239  | 0.42229  |
| C  | -3.26662 | -2.03811 | 1.52636  | C                                                 | -2.40726 | 0.36969  | 0.03333  |
| C  | -4.77257 | -1.83191 | 1.42245  | C                                                 | -3.56636 | 1.05895  | -0.32392 |
| C  | -2.73464 | -1.37827 | 2.79226  | C                                                 | -3.58760 | 2.46131  | -0.31808 |
| H  | -3.04132 | -3.11564 | 1.57418  | C                                                 | -2.40161 | 3.12512  | 0.04909  |
| H  | -5.22660 | -2.35438 | 0.57270  | H                                                 | -4.44110 | 0.50072  | -0.64727 |
| H  | -5.26173 | -2.20542 | 2.33166  | H                                                 | -2.39001 | 4.20943  | 0.03383  |
| H  | -5.01834 | -0.76428 | 1.34043  | C                                                 | 3.58694  | 2.46196  | -0.31831 |
| H  | -1.65747 | -1.53661 | 2.91635  | C                                                 | 3.56606  | 1.05961  | -0.32381 |
| H  | -2.92569 | -0.29647 | 2.78255  | C                                                 | 2.40711  | 0.37014  | 0.03355  |
| H  | -3.24106 | -1.79490 | 3.67229  | C                                                 | 1.23642  | 1.03262  | 0.42235  |
| C  | 3.28384  | -2.04707 | -1.42149 | C                                                 | 1.24868  | 2.44019  | 0.42562  |
| C  | 2.71431  | -1.50861 | -2.72607 | C                                                 | 2.40083  | 3.12556  | 0.04885  |
| C  | 3.33879  | -3.56993 | -1.43623 | H                                                 | 4.44097  | 0.50151  | -0.64692 |
| H  | 4.30210  | -1.64945 | -1.29175 | H                                                 | 2.38904  | 4.20986  | 0.03340  |
| H  | 2.64344  | -0.41448 | -2.72927 | C                                                 | -1.24931 | 2.43993  | 0.42568  |
| H  | 3.35580  | -1.80915 | -3.56484 | C                                                 | -0.00042 | 3.18220  | 0.90823  |
| H  | 1.70911  | -1.90731 | -2.90840 | C                                                 | -0.00012 | 0.26806  | 0.82271  |
| H  | 3.83070  | -3.98863 | -0.54987 | N                                                 | 4.72891  | 3.16901  | -0.66450 |
| H  | 2.32696  | -3.99339 | -1.48795 | N                                                 | -4.72978 | 3.16823  | -0.66397 |
| H  | 3.89232  | -3.92017 | -2.31694 | C                                                 | -0.00082 | 4.65009  | 0.48692  |
| C  | 3.26660  | -2.03817 | 1.52638  | H                                                 | 0.87183  | 5.17309  | 0.89342  |
| C  | 2.73455  | -1.37843 | 2.79231  | H                                                 | -0.00058 | 4.77223  | -0.60340 |
| C  | 4.77255  | -1.83191 | 1.42255  | H                                                 | -0.87410 | 5.17243  | 0.89294  |
| H  | 3.04134  | -3.11572 | 1.57411  | C                                                 | -0.00041 | 3.15874  | 2.45111  |
| H  | 1.65738  | -1.53681 | 2.91633  | H                                                 | -0.89118 | 3.67098  | 2.83842  |
| H  | 3.24093  | -1.79512 | 3.67233  | H                                                 | -0.00016 | 2.13771  | 2.84823  |
| H  | 2.92557  | -0.29663 | 2.78268  | H                                                 | 0.89011  | 3.67142  | 2.83841  |
| H  | 5.22664  | -2.35428 | 0.57278  | C                                                 | 4.65255  | 4.59760  | -0.85259 |
| H  | 5.01828  | -0.76425 | 1.34063  | H                                                 | 5.63930  | 4.97806  | -1.12876 |
| H  | 5.26169  | -2.20546 | 2.33175  | H                                                 | 3.94277  | 4.89140  | -1.64380 |
| H  | -0.00003 | 0.19710  | 1.85578  | H                                                 | 4.35508  | 5.11108  | 0.07229  |
| Ir | 0.00001  | -1.79700 | 0.04144  | C                                                 | 5.85752  | 2.45471  | -1.20854 |
| H  | -0.00003 | -2.09551 | 1.66801  | H                                                 | 5.62228  | 1.92533  | -2.14745 |



|   |          |          |          |                                                               |          |          |          |
|---|----------|----------|----------|---------------------------------------------------------------|----------|----------|----------|
| H | 6.66838  | 3.15857  | -1.41265 | H                                                             | 3.86544  | -3.87843 | -2.38933 |
| H | 6.24416  | 1.71296  | -0.49506 | C                                                             | 3.30047  | -2.03751 | 1.47530  |
| C | -4.65344 | 4.59677  | -0.85252 | C                                                             | 2.77692  | -1.41240 | 2.76259  |
| H | -3.94404 | 4.89034  | -1.64417 | C                                                             | 4.79803  | -1.78862 | 1.34877  |
| H | -5.64032 | 4.97720  | -1.12826 | H                                                             | 3.10993  | -3.12255 | 1.50846  |
| H | -4.35550 | 5.11046  | 0.07208  | H                                                             | 1.70582  | -1.59203 | 2.91072  |
| C | -5.85818 | 2.45386  | -1.20836 | H                                                             | 3.30922  | -1.82772 | 3.62795  |
| H | -6.66939 | 3.15755  | -1.41174 | H                                                             | 2.93881  | -0.32609 | 2.76508  |
| H | -5.62296 | 1.92527  | -2.14773 | H                                                             | 5.24559  | -2.27205 | 0.47281  |
| H | -6.24435 | 1.71146  | -0.49533 | H                                                             | 5.01321  | -0.71282 | 1.29354  |
| P | -2.28260 | -1.45519 | 0.01513  | H                                                             | 5.31738  | -2.17641 | 2.23517  |
| P | 2.28311  | -1.45478 | 0.01531  | H                                                             | -0.00014 | 0.20709  | 1.92576  |
| C | -3.24195 | -2.02154 | -1.47192 | Ir                                                            | 0.00017  | -1.81282 | 0.08082  |
| C | -3.35837 | -3.54075 | -1.47617 | H                                                             | 0.00054  | -2.39007 | 1.80048  |
| C | -2.58807 | -1.52366 | -2.75351 | H                                                             | 0.00040  | -1.05735 | -1.32454 |
| H | -4.24788 | -1.58109 | -1.39243 | H                                                             | -0.00017 | -3.10720 | 1.32233  |
| H | -3.92857 | -3.92780 | -0.62274 | H                                                             | 0.00066  | -3.22657 | -0.81428 |
| H | -3.86440 | -3.87905 | -2.38968 |                                                               |          |          |          |
| H | -2.36239 | -4.00306 | -1.45421 | <b>92</b>                                                     |          |          |          |
| H | -2.45679 | -0.43488 | -2.75858 | <b>Benzene solvent 3-H<sub>4</sub> (dihydride-dihydrogen)</b> |          |          |          |
| H | -1.59925 | -1.98018 | -2.88659 | C                                                             | -1.23908 | 1.01993  | 0.35216  |
| H | -3.20610 | -1.79396 | -3.61979 | C                                                             | -2.42137 | 0.36128  | 0.00429  |
| C | -3.29998 | -2.03813 | 1.47499  | C                                                             | -3.58730 | 1.04924  | -0.32585 |
| C | -4.79752 | -1.78929 | 1.34833  | C                                                             | -3.60181 | 2.45236  | -0.32824 |
| C | -2.77666 | -1.41315 | 2.76248  | C                                                             | -2.40843 | 3.11258  | 0.01954  |
| H | -3.10941 | -3.12317 | 1.50804  | H                                                             | -4.47419 | 0.49209  | -0.61640 |
| H | -5.24495 | -2.27254 | 0.47221  | H                                                             | -2.39652 | 4.19681  | 0.01135  |
| H | -5.31696 | -2.17726 | 2.23460  | C                                                             | 3.60187  | 2.45227  | -0.32825 |
| H | -5.01269 | -0.71348 | 1.29327  | C                                                             | 3.58732  | 1.04915  | -0.32586 |
| H | -1.70560 | -1.59285 | 2.91083  | C                                                             | 2.42137  | 0.36121  | 0.00428  |
| H | -2.93849 | -0.32683 | 2.76508  | C                                                             | 1.23911  | 1.01988  | 0.35216  |
| H | -3.30916 | -1.82853 | 3.62769  | C                                                             | 1.24847  | 2.42540  | 0.37009  |
| C | 3.24268  | -2.02092 | -1.47172 | C                                                             | 2.40850  | 3.11251  | 0.01953  |
| C | 2.58891  | -1.52316 | -2.75340 | H                                                             | 4.47420  | 0.49198  | -0.61641 |
| C | 3.35926  | -3.54016 | -1.47590 | H                                                             | 2.39658  | 4.19674  | 0.01137  |
| H | 4.24852  | -1.58033 | -1.39215 | C                                                             | -1.24840 | 2.42545  | 0.37010  |
| H | 2.45753  | -0.43441 | -2.75854 | C                                                             | 0.00007  | 3.16512  | 0.85188  |
| H | 3.20710  | -1.79347 | -3.61956 | C                                                             | 0.00000  | 0.24171  | 0.72639  |
| H | 1.60018  | -1.97985 | -2.88662 | N                                                             | 4.74614  | 3.16107  | -0.65685 |
| H | 3.92939  | -3.92710 | -0.62238 | N                                                             | -4.74606 | 3.16119  | -0.65685 |
| H | 2.36331  | -4.00253 | -1.45401 |                                                               |          |          |          |

|   |          |          |          |                                                   |          |          |          |
|---|----------|----------|----------|---------------------------------------------------|----------|----------|----------|
| C | 0.00020  | 4.63531  | 0.43890  | H                                                 | -5.23637 | -2.11114 | 2.39933  |
| H | 0.87296  | 5.15578  | 0.84807  | H                                                 | -4.99460 | -0.70105 | 1.36388  |
| H | 0.00007  | 4.76325  | -0.65070 | H                                                 | -1.61059 | -1.47577 | 2.89083  |
| H | -0.87230 | 5.15602  | 0.84831  | H                                                 | -2.87075 | -0.22348 | 2.76579  |
| C | 0.00010  | 3.12925  | 2.39500  | H                                                 | -3.17807 | -1.69985 | 3.69487  |
| H | -0.89072 | 3.63800  | 2.78662  | C                                                 | 3.31600  | -2.08003 | -1.38385 |
| H | 0.00003  | 2.10459  | 2.78403  | C                                                 | 2.78048  | -1.58170 | -2.71806 |
| H | 0.89101  | 3.63786  | 2.78658  | C                                                 | 3.38172  | -3.60227 | -1.35679 |
| C | 4.67382  | 4.59110  | -0.83507 | H                                                 | 4.33029  | -1.67749 | -1.24001 |
| H | 5.66293  | 4.97177  | -1.10186 | H                                                 | 2.69832  | -0.48907 | -2.75113 |
| H | 3.97063  | 4.89019  | -1.62988 | H                                                 | 3.44867  | -1.89811 | -3.53001 |
| H | 4.36972  | 5.09948  | 0.09073  | H                                                 | 1.78290  | -1.99072 | -2.91857 |
| C | 5.89283  | 2.44859  | -1.16431 | H                                                 | 3.84102  | -3.99568 | -0.44190 |
| H | 5.68134  | 1.90268  | -2.09917 | H                                                 | 2.37688  | -4.03839 | -1.43955 |
| H | 6.70125  | 3.15651  | -1.36353 | H                                                 | 3.96996  | -3.97233 | -2.20635 |
| H | 6.27139  | 1.72141  | -0.43152 | C                                                 | 3.25393  | -1.98868 | 1.55471  |
| C | -4.67369 | 4.59122  | -0.83506 | C                                                 | 2.68905  | -1.30686 | 2.79419  |
| H | -3.97047 | 4.89029  | -1.62984 | C                                                 | 4.75887  | -1.76877 | 1.47176  |
| H | -5.66278 | 4.97193  | -1.10188 | H                                                 | 3.03953  | -3.06730 | 1.62670  |
| H | -4.36960 | 5.09959  | 0.09075  | H                                                 | 1.61049  | -1.47581 | 2.89081  |
| C | -5.89279 | 2.44875  | -1.16427 | H                                                 | 3.17796  | -1.69988 | 3.69489  |
| H | -6.70117 | 3.15670  | -1.36351 | H                                                 | 2.87066  | -0.22353 | 2.76579  |
| H | -5.68133 | 1.90280  | -2.09912 | H                                                 | 5.23387  | -2.30923 | 0.64477  |
| H | -6.27137 | 1.72161  | -0.43145 | H                                                 | 4.99454  | -0.70112 | 1.36392  |
| P | -2.29363 | -1.45639 | 0.03881  | H                                                 | 5.23628  | -2.11120 | 2.39940  |
| P | 2.29359  | -1.45646 | 0.03882  | H                                                 | 0.00000  | 0.15243  | 1.82717  |
| C | -3.31606 | -2.07992 | -1.38386 | Ir                                                | -0.00003 | -1.78156 | 0.03145  |
| C | -3.38191 | -3.60215 | -1.35676 | H                                                 | -0.00004 | -2.32636 | 1.63176  |
| C | -2.78047 | -1.58167 | -2.71808 | H                                                 | -0.00001 | -1.05611 | -1.48517 |
| H | -4.33032 | -1.67729 | -1.24005 | H                                                 | -0.00004 | -3.55442 | -0.15690 |
| H | -3.84126 | -3.99549 | -0.44186 | H                                                 | -0.00006 | -3.23457 | -0.97433 |
| H | -3.97016 | -3.97218 | -2.20633 |                                                   |          |          |          |
| H | -2.37711 | -4.03836 | -1.43948 | <b>92</b>                                         |          |          |          |
| H | -2.69821 | -0.48905 | -2.75118 | <b>Benzene solvent 4-H<sub>4</sub> (dihydride</b> |          |          |          |
| H | -1.78293 | -1.99078 | -2.91856 | <b>dihydrogen)</b>                                |          |          |          |
| H | -3.44867 | -1.89804 | -3.53003 | C                                                 | -1.24412 | 1.03728  | 0.34910  |
| C | -3.25401 | -1.98861 | 1.55468  | C                                                 | -2.43453 | 0.36290  | 0.04271  |
| C | -4.75894 | -1.76870 | 1.47171  | C                                                 | -3.61259 | 1.04508  | -0.25834 |
| C | -2.68914 | -1.30682 | 2.79419  | C                                                 | -3.63068 | 2.44859  | -0.28980 |
| H | -3.03962 | -3.06724 | 1.62666  | C                                                 | -2.42813 | 3.11990  | 0.00110  |
| H | -5.23393 | -2.30915 | 0.64469  | H                                                 | -4.50856 | 0.48218  | -0.50739 |

|   |          |          |          |    |          |          |          |
|---|----------|----------|----------|----|----------|----------|----------|
| H | -2.42114 | 4.20391  | -0.03180 | C  | -3.51973 | -3.59309 | -1.25030 |
| C | 3.63036  | 2.44887  | -0.29028 | C  | -2.94370 | -1.60327 | -2.65920 |
| C | 3.61248  | 1.04535  | -0.25844 | H  | -4.41557 | -1.63994 | -1.10033 |
| C | 2.43454  | 0.36310  | 0.04285  | H  | -3.98209 | -3.96585 | -0.32859 |
| C | 1.24404  | 1.03739  | 0.34914  | H  | -4.12385 | -3.95660 | -2.09175 |
| C | 1.25646  | 2.44311  | 0.33461  | H  | -2.52291 | -4.04719 | -1.33179 |
| C | 2.42778  | 3.12009  | 0.00068  | H  | -2.79068 | -0.51782 | -2.70172 |
| H | 4.50850  | 0.48250  | -0.50744 | H  | -1.99893 | -2.09222 | -2.92910 |
| H | 2.42067  | 4.20409  | -0.03242 | H  | -3.68173 | -1.86907 | -3.42706 |
| C | -1.25668 | 2.44301  | 0.33475  | C  | -3.12387 | -2.02722 | 1.63065  |
| C | -0.00012 | 3.19392  | 0.78399  | C  | -4.62432 | -1.76627 | 1.66788  |
| C | -0.00001 | 0.26984  | 0.69914  | C  | -2.45326 | -1.39613 | 2.84413  |
| N | 4.78776  | 3.14867  | -0.59482 | H  | -2.93261 | -3.11183 | 1.65194  |
| N | -4.78824 | 3.14828  | -0.59394 | H  | -5.17430 | -2.26948 | 0.86435  |
| C | -0.00021 | 4.64915  | 0.32120  | H  | -5.04023 | -2.12373 | 2.61899  |
| H | 0.87221  | 5.18462  | 0.71085  | H  | -4.83737 | -0.69019 | 1.60657  |
| H | -0.00031 | 4.73737  | -0.77252 | H  | -1.37861 | -1.60709 | 2.87449  |
| H | -0.87258 | 5.18457  | 0.71101  | H  | -2.59067 | -0.30597 | 2.84984  |
| C | -0.00000 | 3.20234  | 2.32754  | H  | -2.90132 | -1.78961 | 3.76565  |
| H | -0.89115 | 3.72055  | 2.70606  | C  | 3.42277  | -2.07304 | -1.29133 |
| H | 0.00013  | 2.18642  | 2.74015  | C  | 2.94467  | -1.60377 | -2.65835 |
| H | 0.89111  | 3.72072  | 2.70592  | C  | 3.52045  | -3.59318 | -1.24878 |
| C | 4.72523  | 4.57478  | -0.80332 | H  | 4.41612  | -1.63993 | -1.09906 |
| H | 5.72339  | 4.94817  | -1.04548 | H  | 2.79169  | -0.51833 | -2.70123 |
| H | 4.04855  | 4.86013  | -1.62594 | H  | 3.68286  | -1.86982 | -3.42596 |
| H | 4.39302  | 5.10204  | 0.10216  | H  | 1.99994  | -2.09278 | -2.92831 |
| C | 5.94895  | 2.42362  | -1.04783 | H  | 3.98254  | -3.96569 | -0.32682 |
| H | 5.76746  | 1.85829  | -1.97764 | H  | 2.52370  | -4.04738 | -1.33048 |
| H | 6.76565  | 3.12541  | -1.23489 | H  | 4.12488  | -3.95686 | -2.08993 |
| H | 6.30071  | 1.71147  | -0.28760 | C  | 3.12368  | -2.02650 | 1.63164  |
| C | -4.72604 | 4.57446  | -0.80215 | C  | 2.45258  | -1.39533 | 2.84482  |
| H | -4.04959 | 4.86011  | -1.62485 | C  | 4.62405  | -1.76518 | 1.66924  |
| H | -5.72432 | 4.94770  | -1.04400 | H  | 2.93268  | -3.11115 | 1.65311  |
| H | -4.39372 | 5.10159  | 0.10337  | H  | 1.37797  | -1.60653 | 2.87491  |
| C | -5.94945 | 2.42312  | -1.04671 | H  | 2.90046  | -1.78855 | 3.76653  |
| H | -6.76636 | 3.12479  | -1.23330 | H  | 2.58976  | -0.30514 | 2.85038  |
| H | -5.76818 | 1.85805  | -1.97673 | H  | 5.17439  | -2.26851 | 0.86604  |
| H | -6.30077 | 1.71071  | -0.28652 | H  | 4.83685  | -0.68907 | 1.60764  |
| P | -2.29148 | -1.46604 | 0.05492  | H  | 5.03977  | -2.12223 | 2.62059  |
| P | 2.29165  | -1.46587 | 0.05551  | H  | -0.00005 | 0.12803  | 1.79452  |
| C | -3.42213 | -2.07294 | -1.29243 | Ir | 0.00015  | -1.78177 | -0.11328 |

|   |         |          |          |
|---|---------|----------|----------|
| H | 0.00002 | -2.36458 | 1.37188  |
| H | 0.00026 | -0.82469 | -1.65335 |
| H | 0.00011 | -3.40310 | -0.53781 |
| H | 0.00033 | -1.64640 | -1.90481 |

92

**Benzene solvent transition state for 1-H<sub>4</sub> to 2-H<sub>4</sub> (tetrahydride to dihydrogen dihydride)**

|   |          |         |          |
|---|----------|---------|----------|
| C | -1.23874 | 1.03449 | 0.40631  |
| C | -2.41220 | 0.36856 | 0.03325  |
| C | -3.57545 | 1.05524 | -0.31402 |
| C | -3.59732 | 2.45788 | -0.31293 |
| C | -2.40812 | 3.12391 | 0.03939  |
| H | -4.45323 | 0.49526 | -0.62590 |
| H | -2.39837 | 4.20812 | 0.02138  |
| C | 3.59732  | 2.45787 | -0.31296 |
| C | 3.57545  | 1.05523 | -0.31404 |
| C | 2.41220  | 0.36856 | 0.03324  |
| C | 1.23874  | 1.03449 | 0.40631  |
| C | 1.25085  | 2.44142 | 0.40594  |
| C | 2.40813  | 3.12391 | 0.03938  |
| H | 4.45322  | 0.49526 | -0.62592 |
| H | 2.39838  | 4.20812 | 0.02137  |
| C | -1.25085 | 2.44142 | 0.40595  |
| C | 0.00000  | 3.18708 | 0.87872  |
| C | 0.00000  | 0.27560 | 0.80481  |
| N | 4.74320  | 3.16225 | -0.64888 |
| N | -4.74321 | 3.16226 | -0.64884 |
| C | 0.00000  | 4.65009 | 0.44056  |
| H | 0.87272  | 5.17781 | 0.84044  |
| H | 0.00000  | 4.75846 | -0.65121 |
| H | -0.87271 | 5.17782 | 0.84045  |
| C | 0.00001  | 3.17854 | 2.42183  |
| H | -0.89068 | 3.69444 | 2.80436  |
| H | 0.00001  | 2.16120 | 2.82869  |
| H | 0.89070  | 3.69444 | 2.80436  |
| C | 4.67351  | 4.59160 | -0.83354 |
| H | 5.66380  | 4.96935 | -1.10036 |
| H | 3.97176  | 4.88962 | -1.63021 |

|   |          |          |          |
|---|----------|----------|----------|
| H | 4.36968  | 5.10386  | 0.09005  |
| C | 5.88046  | 2.44532  | -1.17102 |
| H | 5.65929  | 1.90947  | -2.10957 |
| H | 6.69344  | 3.14856  | -1.36850 |
| H | 6.25751  | 1.70871  | -0.44703 |
| C | -4.67350 | 4.59161  | -0.83355 |
| H | -3.97180 | 4.88959  | -1.63028 |
| H | -5.66380 | 4.96937  | -1.10031 |
| H | -4.36960 | 5.10388  | 0.09001  |
| C | -5.88042 | 2.44533  | -1.17109 |
| H | -6.69341 | 3.14856  | -1.36857 |
| H | -5.65919 | 1.90955  | -2.10966 |
| H | -6.25750 | 1.70867  | -0.44717 |
| P | -2.28889 | -1.45605 | 0.01866  |
| P | 2.28889  | -1.45605 | 0.01865  |
| C | -3.24847 | -2.02675 | -1.46576 |
| C | -3.34138 | -3.54765 | -1.47812 |
| C | -2.61985 | -1.50891 | -2.75167 |
| H | -4.26013 | -1.60285 | -1.37100 |
| H | -3.88846 | -3.94942 | -0.61652 |
| H | -3.85951 | -3.88752 | -2.38414 |
| H | -2.33857 | -3.99532 | -1.47872 |
| H | -2.51427 | -0.41748 | -2.75337 |
| H | -1.62200 | -1.94015 | -2.89864 |
| H | -3.24203 | -1.79028 | -3.61143 |
| C | -3.29629 | -2.04328 | 1.48133  |
| C | -4.79598 | -1.80481 | 1.35961  |
| C | -2.77062 | -1.41584 | 2.76649  |
| H | -3.09674 | -3.12666 | 1.51347  |
| H | -5.24448 | -2.29451 | 0.48760  |
| H | -5.30845 | -2.19310 | 2.24968  |
| H | -5.01905 | -0.73070 | 1.30209  |
| H | -1.69745 | -1.59022 | 2.90529  |
| H | -2.94154 | -0.33082 | 2.77198  |
| H | -3.29551 | -1.83726 | 3.63335  |
| C | 3.24845  | -2.02675 | -1.46578 |
| C | 2.61983  | -1.50892 | -2.75168 |
| C | 3.34137  | -3.54765 | -1.47813 |
| H | 4.26012  | -1.60285 | -1.37102 |
| H | 2.51424  | -0.41749 | -2.75338 |
| H | 3.24200  | -1.79030 | -3.61144 |

|    |          |          |          |   |          |         |          |
|----|----------|----------|----------|---|----------|---------|----------|
| H  | 1.62198  | -1.94017 | -2.89864 | C | 0.00002  | 3.17889 | 0.83346  |
| H  | 3.88846  | -3.94942 | -0.61654 | C | 0.00000  | 0.25873 | 0.73501  |
| H  | 2.33856  | -3.99533 | -1.47872 | N | 4.75715  | 3.15724 | -0.64199 |
| H  | 3.85949  | -3.88753 | -2.38415 | N | -4.75706 | 3.15732 | -0.64213 |
| C  | 3.29630  | -2.04328 | 1.48132  | C | 0.00004  | 4.64249 | 0.39739  |
| C  | 2.77063  | -1.41584 | 2.76648  | H | 0.87253  | 5.16991 | 0.79792  |
| C  | 4.79598  | -1.80481 | 1.35959  | H | 0.00005  | 4.75193 | -0.69426 |
| H  | 3.09675  | -3.12666 | 1.51345  | H | -0.87246 | 5.16992 | 0.79790  |
| H  | 1.69746  | -1.59023 | 2.90528  | C | 0.00001  | 3.16497 | 2.37681  |
| H  | 3.29552  | -1.83727 | 3.63333  | H | -0.89084 | 3.67897 | 2.76146  |
| H  | 2.94154  | -0.33083 | 2.77197  | H | -0.00001 | 2.14559 | 2.77942  |
| H  | 5.24448  | -2.29451 | 0.48758  | H | 0.89087  | 3.67895 | 2.76147  |
| H  | 5.01905  | -0.73070 | 1.30207  | C | 4.69097  | 4.58730 | -0.82169 |
| H  | 5.30846  | -2.19311 | 2.24965  | H | 5.68299  | 4.96434 | -1.08268 |
| H  | 0.00000  | 0.21052  | 1.90599  | H | 3.99396  | 4.88807 | -1.62125 |
| Ir | -0.00000 | -1.80849 | 0.08141  | H | 4.38265  | 5.09773 | 0.10169  |
| H  | -0.00000 | -2.24196 | 1.70852  | C | 5.90872  | 2.44054 | -1.13164 |
| H  | -0.00000 | -0.99179 | -1.33368 | H | 5.70873  | 1.89249 | -2.06779 |
| H  | -0.00000 | -3.17022 | 1.04841  | H | 6.72172  | 3.14571 | -1.32180 |
| H  | -0.00001 | -3.10220 | -0.95602 | H | 6.27517  | 1.71439 | -0.39158 |

## 92

### Benzene solvent transition state for 1-H<sub>4</sub> to 3-H<sub>4</sub> (tetrahydride to dihydrogen dihydride)

|   |          |         |          |   |          |          |          |
|---|----------|---------|----------|---|----------|----------|----------|
| C | -1.23995 | 1.02817 | 0.35594  | H | -3.99367 | 4.88797  | -1.62153 |
| C | -2.42124 | 0.36423 | 0.01186  | H | -5.68276 | 4.96440  | -1.08320 |
| C | -3.59020 | 1.04910 | -0.31566 | H | -4.38257 | 5.09792  | 0.10132  |
| C | -3.60855 | 2.45218 | -0.32061 | C | -5.90873 | 2.44062  | -1.13152 |
| C | -2.41415 | 3.11686 | 0.01563  | H | -6.72170 | 3.14582  | -1.32172 |
| H | -4.47609 | 0.48916 | -0.60391 | H | -5.70888 | 1.89240  | -2.06761 |
| H | -2.40522 | 4.20110 | 0.00191  | H | -6.27515 | 1.71462  | -0.39131 |
| C | 3.60861  | 2.45213 | -0.32055 | P | -2.29453 | -1.45614 | 0.03768  |
| C | 3.59022  | 1.04904 | -0.31567 | P | 2.29450  | -1.45617 | 0.03762  |
| C | 2.42124  | 0.36420 | 0.01183  | C | -3.29651 | -2.06843 | -1.40302 |
| C | 1.23997  | 1.02816 | 0.35594  | C | -3.35477 | -3.59116 | -1.39313 |
| C | 1.25090  | 2.43394 | 0.36329  | C | -2.74657 | -1.55244 | -2.72476 |
| C | 2.41422  | 3.11683 | 0.01569  | H | -4.31381 | -1.67068 | -1.26698 |
| H | 4.47610  | 0.48909 | -0.60394 | H | -3.82555 | -3.99627 | -0.48919 |
| H | 2.40531  | 4.20106 | 0.00200  | H | -3.92907 | -3.95432 | -2.25510 |
| C | -1.25086 | 2.43396 | 0.36327  | H | -2.34622 | -4.02031 | -1.46520 |
|   |          |         |          | H | -2.67203 | -0.45890 | -2.74556 |
|   |          |         |          | H | -1.74436 | -1.95393 | -2.91693 |
|   |          |         |          | H | -3.40241 | -1.86436 | -3.54833 |
|   |          |         |          | C | -3.26585 | -2.00492 | 1.53950  |

|                                                             |          |          |          |   |          |         |          |
|-------------------------------------------------------------|----------|----------|----------|---|----------|---------|----------|
| C                                                           | -4.77142 | -1.79474 | 1.44126  | C | -2.43440 | 0.36385 | 0.03949  |
| C                                                           | -2.72074 | -1.32760 | 2.79031  | C | -3.61328 | 1.04471 | -0.26040 |
| H                                                           | -3.04492 | -3.08258 | 1.60529  | C | -3.63229 | 2.44821 | -0.29051 |
| H                                                           | -5.23306 | -2.33097 | 0.60413  | C | -2.42968 | 3.11980 | -0.00093 |
| H                                                           | -5.25652 | -2.14922 | 2.36029  | H | -4.50849 | 0.48128 | -0.51089 |
| H                                                           | -5.01362 | -0.72785 | 1.34084  | H | -2.42358 | 4.20376 | -0.03362 |
| H                                                           | -1.64263 | -1.48927 | 2.90229  | C | 3.63229  | 2.44820 | -0.29052 |
| H                                                           | -2.90876 | -0.24538 | 2.76615  | C | 3.61328  | 1.04471 | -0.26041 |
| H                                                           | -3.21922 | -1.72945 | 3.68176  | C | 2.43439  | 0.36384 | 0.03948  |
| C                                                           | 3.29643  | -2.06846 | -1.40311 | C | 1.24475  | 1.03827 | 0.34417  |
| C                                                           | 2.74647  | -1.55243 | -2.72483 | C | 1.25701  | 2.44372 | 0.33023  |
| C                                                           | 3.35466  | -3.59119 | -1.39325 | C | 2.42968  | 3.11980 | -0.00093 |
| H                                                           | 4.31374  | -1.67072 | -1.26708 | H | 4.50849  | 0.48128 | -0.51090 |
| H                                                           | 2.67195  | -0.45889 | -2.74561 | H | 2.42358  | 4.20376 | -0.03363 |
| H                                                           | 3.40228  | -1.86434 | -3.54842 | C | -1.25701 | 2.44372 | 0.33024  |
| H                                                           | 1.74426  | -1.95390 | -2.91699 | C | 0.00000  | 3.19663 | 0.77521  |
| H                                                           | 3.82545  | -3.99632 | -0.48933 | C | 0.00000  | 0.27554 | 0.70058  |
| H                                                           | 2.34610  | -4.02031 | -1.46531 | N | 4.79038  | 3.14727 | -0.59246 |
| H                                                           | 3.92894  | -3.95434 | -2.25524 | N | -4.79038 | 3.14727 | -0.59245 |
| C                                                           | 3.26584  | -2.00500 | 1.53941  | C | 0.00000  | 4.64879 | 0.30246  |
| C                                                           | 2.72078  | -1.32767 | 2.79025  | H | 0.87217  | 5.18703 | 0.68862  |
| C                                                           | 4.77142  | -1.79486 | 1.44114  | H | 0.00000  | 4.72907 | -0.79182 |
| H                                                           | 3.04488  | -3.08265 | 1.60519  | H | -0.87216 | 5.18703 | 0.68862  |
| H                                                           | 1.64267  | -1.48931 | 2.90224  | C | 0.00000  | 3.21541 | 2.31864  |
| H                                                           | 3.21927  | -1.72956 | 3.68168  | H | -0.89109 | 3.73632 | 2.69350  |
| H                                                           | 2.90885  | -0.24546 | 2.76610  | H | 0.00000  | 2.20263 | 2.73876  |
| H                                                           | 5.23302  | -2.33110 | 0.60399  | H | 0.89110  | 3.73632 | 2.69350  |
| H                                                           | 5.01365  | -0.72798 | 1.34072  | C | 4.72895  | 4.57320 | -0.80303 |
| H                                                           | 5.25653  | -2.14938 | 2.36015  | H | 5.72714  | 4.94527 | -1.04691 |
| H                                                           | 0.00001  | 0.17599  | 1.83556  | H | 4.05187  | 4.85726 | -1.62564 |
| Ir                                                          | -0.00002 | -1.79166 | 0.04480  | H | 4.39787  | 5.10245 | 0.10176  |
| H                                                           | 0.00000  | -2.23911 | 1.66310  | C | 5.95437  | 2.42126 | -1.03661 |
| H                                                           | -0.00003 | -1.02049 | -1.44177 | H | 5.77928  | 1.85554 | -1.96741 |
| H                                                           | -0.00004 | -3.47205 | 0.03011  | H | 6.77291  | 3.12237 | -1.21806 |
| H                                                           | -0.00004 | -3.10242 | -0.99396 | H | 6.29989  | 1.70935 | -0.27320 |
|                                                             |          |          |          | C | -4.72894 | 4.57320 | -0.80304 |
| <b>92</b>                                                   |          |          |          | H | -4.05187 | 4.85725 | -1.62566 |
| <b>Benzene solvent transition state for 1-H<sub>4</sub></b> |          |          |          | H | -5.72713 | 4.94527 | -1.04691 |
| <b>to 4-H<sub>4</sub> (tetrahydride to dihydrogen</b>       |          |          |          | H | -4.39785 | 5.10246 | 0.10174  |
| <b>dihydride)</b>                                           |          |          |          | C | -5.95436 | 2.42127 | -1.03663 |
| C                                                           | -1.24475 | 1.03827  | 0.34417  | H | -6.77290 | 3.12238 | -1.21809 |

|   |          |          |          |                                                            |          |          |          |
|---|----------|----------|----------|------------------------------------------------------------|----------|----------|----------|
| H | -5.77925 | 1.85557  | -1.96744 | H                                                          | 5.18312  | -2.33379 | 0.79577  |
| H | -6.29989 | 1.70934  | -0.27325 | H                                                          | 4.90674  | -0.73575 | 1.52409  |
| P | -2.29578 | -1.46364 | 0.05339  | H                                                          | 5.09821  | -2.16026 | 2.55067  |
| P | 2.29578  | -1.46364 | 0.05339  | H                                                          | 0.00000  | 0.14718  | 1.79710  |
| C | -3.38866 | -2.07002 | -1.32282 | Ir                                                         | -0.00000 | -1.78635 | -0.07457 |
| C | -3.45696 | -3.59223 | -1.30443 | H                                                          | -0.00000 | -2.26123 | 1.48512  |
| C | -2.90646 | -1.56652 | -2.67597 | H                                                          | -0.00000 | -0.93274 | -1.53523 |
| H | -4.39268 | -1.66028 | -1.13505 | H                                                          | 0.00000  | -3.44057 | -0.24031 |
| H | -3.90594 | -3.98831 | -0.38570 | H                                                          | -0.00000 | -2.03683 | -1.71815 |
| H | -4.05876 | -3.95412 | -2.14811 |                                                            |          |          |          |
| H | -2.45256 | -4.02634 | -1.39768 | <b>92</b>                                                  |          |          |          |
| H | -2.78267 | -0.47709 | -2.69932 | <b>Benzene solvent transition state 3-H<sub>4</sub> to</b> |          |          |          |
| H | -1.94468 | -2.02177 | -2.94304 | <b>Ir-H<sub>2</sub> (H<sub>2</sub> loss)</b>               |          |          |          |
| H | -3.62866 | -1.84127 | -3.45567 | C                                                          | -1.24490 | 1.04292  | 0.25320  |
| C | -3.16013 | -2.02671 | 1.61146  | C                                                          | -2.43568 | 0.36254  | -0.02255 |
| C | -4.66738 | -1.80493 | 1.60549  | C                                                          | -3.60914 | 1.03829  | -0.34345 |
| C | -2.53938 | -1.36377 | 2.83474  | C                                                          | -3.62302 | 2.44111  | -0.41407 |
| H | -2.94099 | -3.10556 | 1.65159  | C                                                          | -2.42743 | 3.11737  | -0.11073 |
| H | -5.18312 | -2.33379 | 0.79578  | H                                                          | -4.50736 | 0.47128  | -0.57297 |
| H | -5.09821 | -2.16026 | 2.55068  | H                                                          | -2.42486 | 4.20113  | -0.13973 |
| H | -4.90674 | -0.73575 | 1.52409  | C                                                          | 3.62300  | 2.44114  | -0.41407 |
| H | -1.45999 | -1.54306 | 2.89431  | C                                                          | 3.60913  | 1.03832  | -0.34345 |
| H | -2.70974 | -0.27835 | 2.82554  | C                                                          | 2.43568  | 0.36256  | -0.02255 |
| H | -2.99904 | -1.76205 | 3.74838  | C                                                          | 1.24489  | 1.04293  | 0.25319  |
| C | 3.38866  | -2.07002 | -1.32283 | C                                                          | 1.25228  | 2.44611  | 0.22373  |
| C | 2.90645  | -1.56653 | -2.67597 | C                                                          | 2.42740  | 3.11739  | -0.11075 |
| C | 3.45695  | -3.59224 | -1.30443 | H                                                          | 4.50736  | 0.47131  | -0.57297 |
| H | 4.39267  | -1.66028 | -1.13506 | H                                                          | 2.42482  | 4.20115  | -0.13975 |
| H | 2.78266  | -0.47709 | -2.69932 | C                                                          | -1.25230 | 2.44610  | 0.22374  |
| H | 3.62865  | -1.84128 | -3.45567 | C                                                          | -0.00001 | 3.20665  | 0.66198  |
| H | 1.94467  | -2.02178 | -2.94305 | C                                                          | -0.00000 | 0.27993  | 0.61958  |
| H | 3.90594  | -3.98831 | -0.38570 | N                                                          | 4.77050  | 3.13088  | -0.77249 |
| H | 2.45256  | -4.02635 | -1.39768 | N                                                          | -4.77053 | 3.13084  | -0.77248 |
| H | 4.05876  | -3.95412 | -2.14811 | C                                                          | -0.00002 | 4.65204  | 0.16866  |
| C | 3.16013  | -2.02671 | 1.61146  | H                                                          | 0.87176  | 5.19558  | 0.54780  |
| C | 2.53938  | -1.36378 | 2.83473  | H                                                          | -0.00002 | 4.71639  | -0.92643 |
| C | 4.66738  | -1.80493 | 1.60548  | H                                                          | -0.87181 | 5.19557  | 0.54780  |
| H | 2.94099  | -3.10557 | 1.65158  | C                                                          | -0.00001 | 3.24733  | 2.20505  |
| H | 1.45999  | -1.54307 | 2.89430  | H                                                          | -0.89098 | 3.77358  | 2.57250  |
| H | 2.99904  | -1.76205 | 3.74837  | H                                                          | -0.00001 | 2.24105  | 2.64101  |
| H | 2.70974  | -0.27836 | 2.82554  | H                                                          | 0.89096  | 3.77358  | 2.57250  |

|   |          |          |          |                                         |          |          |          |
|---|----------|----------|----------|-----------------------------------------|----------|----------|----------|
| C | 4.79862  | 4.56925  | -0.65484 | H                                       | 4.30781  | -1.64798 | -1.27432 |
| H | 5.76896  | 4.93975  | -0.99491 | H                                       | 2.57373  | -0.59706 | -2.76687 |
| H | 4.03411  | 5.03667  | -1.28948 | H                                       | 3.34186  | -2.00839 | -3.52208 |
| H | 4.64267  | 4.92267  | 0.37866  | H                                       | 1.70967  | -2.13804 | -2.83411 |
| C | 6.02503  | 2.41805  | -0.82124 | H                                       | 3.99962  | -3.94028 | -0.37958 |
| H | 6.01566  | 1.63899  | -1.59584 | H                                       | 2.46183  | -4.10375 | -1.24311 |
| H | 6.82852  | 3.11432  | -1.07430 | H                                       | 3.98226  | -4.00483 | -2.14718 |
| H | 6.28151  | 1.93582  | 0.13767  | C                                       | 3.24627  | -1.96815 | 1.57778  |
| C | -4.79868 | 4.56921  | -0.65478 | C                                       | 2.58025  | -1.37715 | 2.81353  |
| H | -4.03418 | 5.03667  | -1.28940 | C                                       | 4.73217  | -1.63946 | 1.55465  |
| H | -5.76903 | 4.93970  | -0.99485 | H                                       | 3.10724  | -3.06086 | 1.60421  |
| H | -4.64274 | 4.92260  | 0.37872  | H                                       | 1.52231  | -1.66145 | 2.86944  |
| C | -6.02505 | 2.41799  | -0.82126 | H                                       | 3.07864  | -1.73762 | 3.72273  |
| H | -6.82855 | 3.11424  | -1.07435 | H                                       | 2.64698  | -0.27998 | 2.81391  |
| H | -6.01564 | 1.63893  | -1.59586 | H                                       | 5.26012  | -2.08292 | 0.70168  |
| H | -6.28155 | 1.93576  | 0.13765  | H                                       | 4.89477  | -0.55324 | 1.52850  |
| P | -2.29196 | -1.45961 | 0.05512  | H                                       | 5.21348  | -2.01661 | 2.46674  |
| P | 2.29198  | -1.45960 | 0.05513  | H                                       | 0.00000  | 0.13562  | 1.71794  |
| C | -3.30917 | -2.10335 | -1.36307 | Ir                                      | 0.00001  | -1.75083 | 0.04851  |
| C | -3.44677 | -3.61856 | -1.27022 | H                                       | -0.00003 | -3.04213 | 1.22670  |
| C | -2.69859 | -1.68378 | -2.69354 | H                                       | 0.00002  | -0.91374 | -1.35907 |
| H | -4.30781 | -1.64803 | -1.27431 | H                                       | 0.00006  | -3.66282 | -1.64066 |
| H | -3.99944 | -3.94035 | -0.37957 | H                                       | 0.00025  | -4.35571 | -1.93436 |
| H | -3.98226 | -4.00484 | -2.14718 |                                         |          |          |          |
| H | -2.46174 | -4.10374 | -1.24327 |                                         |          |          |          |
| H | -2.57378 | -0.59703 | -2.76687 | <b>90</b>                               |          |          |          |
| H | -1.70966 | -2.13797 | -2.83413 | <b>Benzene solvent Ir-H<sub>2</sub></b> |          |          |          |
| H | -3.34186 | -2.00838 | -3.52208 | C                                       | -1.25081 | 1.03685  | 0.35427  |
| C | -3.24623 | -1.96816 | 1.57779  | C                                       | -2.44541 | 0.36333  | 0.06325  |
| C | -4.73216 | -1.63956 | 1.55463  | C                                       | -3.62613 | 1.04743  | -0.22075 |
| C | -2.58026 | -1.37706 | 2.81351  | C                                       | -3.64472 | 2.45091  | -0.24482 |
| H | -3.10713 | -3.06087 | 1.60426  | C                                       | -2.43756 | 3.11992  | 0.02991  |
| H | -5.26008 | -2.08311 | 0.70170  | H                                       | -4.52245 | 0.48516  | -0.46911 |
| H | -5.21344 | -2.01669 | 2.46675  | H                                       | -2.43186 | 4.20409  | 0.00293  |
| H | -4.89483 | -0.55336 | 1.52842  | C                                       | 3.64466  | 2.45097  | -0.24482 |
| H | -1.52229 | -1.66127 | 2.86942  | C                                       | 3.62609  | 1.04750  | -0.22075 |
| H | -2.64709 | -0.27990 | 2.81386  | C                                       | 2.44539  | 0.36337  | 0.06326  |
| H | -3.07861 | -1.73755 | 3.72272  | C                                       | 1.25078  | 1.03687  | 0.35427  |
| C | 3.30919  | -2.10333 | -1.36306 | C                                       | 1.26022  | 2.44221  | 0.34277  |
| C | 2.69858  | -1.68381 | -2.69354 | C                                       | 2.43749  | 3.11996  | 0.02990  |
| C | 3.44684  | -3.61854 | -1.27019 | H                                       | 4.52242  | 0.48523  | -0.46910 |



|    |          |          |          |                                         |          |          |          |
|----|----------|----------|----------|-----------------------------------------|----------|----------|----------|
| H  | 2.43177  | 4.20413  | 0.00292  | H                                       | -1.52448 | -1.79740 | -2.84903 |
| C  | -1.26028 | 2.44219  | 0.34277  | H                                       | -3.10533 | -1.67378 | -3.65017 |
| C  | -0.00003 | 3.19456  | 0.78133  | C                                       | -3.29086 | -2.13415 | 1.43885  |
| C  | -0.00001 | 0.26745  | 0.66686  | C                                       | -4.76640 | -1.76289 | 1.43418  |
| N  | 4.80737  | 3.15329  | -0.52742 | C                                       | -2.62627 | -1.72416 | 2.74718  |
| N  | -4.80746 | 3.15318  | -0.52741 | H                                       | -3.18510 | -3.22493 | 1.32659  |
| C  | -0.00004 | 4.64518  | 0.30329  | H                                       | -5.28426 | -2.07237 | 0.51790  |
| H  | 0.87174  | 5.18558  | 0.68707  | H                                       | -5.27937 | -2.24661 | 2.27619  |
| H  | -0.00005 | 4.72080  | -0.79133 | H                                       | -4.89957 | -0.67918 | 1.55125  |
| H  | -0.87180 | 5.18559  | 0.68709  | H                                       | -1.57824 | -2.04902 | 2.78377  |
| C  | -0.00003 | 3.21648  | 2.32450  | H                                       | -2.65014 | -0.63332 | 2.87852  |
| H  | -0.89141 | 3.73705  | 2.69940  | H                                       | -3.15184 | -2.17050 | 3.60141  |
| H  | -0.00003 | 2.20327  | 2.74362  | C                                       | 3.22272  | -1.97934 | -1.51016 |
| H  | 0.89136  | 3.73704  | 2.69939  | C                                       | 2.54426  | -1.40289 | -2.74609 |
| C  | 4.73823  | 4.57410  | -0.76901 | C                                       | 3.31968  | -3.49721 | -1.59153 |
| H  | 5.73734  | 4.94888  | -1.00509 | H                                       | 4.23617  | -1.55553 | -1.43096 |
| H  | 4.07120  | 4.83613  | -1.60722 | H                                       | 2.47475  | -0.30940 | -2.70678 |
| H  | 4.38999  | 5.11926  | 0.11959  | H                                       | 3.10547  | -1.67373 | -3.65012 |
| C  | 5.97563  | 2.42826  | -0.96187 | H                                       | 1.52459  | -1.79737 | -2.84904 |
| H  | 5.81624  | 1.87511  | -1.90335 | H                                       | 3.90129  | -3.93066 | -0.76902 |
| H  | 6.80059  | 3.12823  | -1.11780 | H                                       | 2.32111  | -3.95370 | -1.57210 |
| H  | 6.30329  | 1.70527  | -0.20125 | H                                       | 3.80526  | -3.79702 | -2.52934 |
| C  | -4.73841 | 4.57400  | -0.76896 | C                                       | 3.29086  | -2.13408 | 1.43891  |
| H  | -4.07137 | 4.83610  | -1.60715 | C                                       | 2.62648  | -1.72371 | 2.74722  |
| H  | -5.73754 | 4.94871  | -1.00506 | C                                       | 4.76647  | -1.76313 | 1.43403  |
| H  | -4.39024 | 5.11916  | 0.11966  | H                                       | 3.18486  | -3.22485 | 1.32684  |
| C  | -5.97568 | 2.42808  | -0.96184 | H                                       | 1.57838  | -2.04834 | 2.78397  |
| H  | -6.80068 | 3.12800  | -1.11778 | H                                       | 3.15204  | -2.17003 | 3.60148  |
| H  | -5.81626 | 1.87493  | -1.90332 | H                                       | 2.65061  | -0.63286 | 2.87837  |
| H  | -6.30329 | 1.70507  | -0.20122 | H                                       | 5.28418  | -2.07287 | 0.51775  |
| P  | -2.28970 | -1.46556 | 0.01295  | H                                       | 4.89989  | -0.67943 | 1.55090  |
| P  | 2.28971  | -1.46553 | 0.01298  | H                                       | 5.27943  | -2.24682 | 2.27607  |
| Ir | 0.00001  | -1.80117 | 0.07703  | H                                       | 0.00002  | -2.81661 | -1.14227 |
| C  | -3.22267 | -1.97937 | -1.51022 | H                                       | -0.00001 | 0.04781  | 1.76039  |
| C  | -3.31961 | -3.49724 | -1.59159 | H                                       | 0.00002  | -3.39755 | 0.37736  |
| C  | -2.54416 | -1.40293 | -2.74613 |                                         |          |          |          |
| H  | -4.23611 | -1.55556 | -1.43105 | <b>90</b>                               |          |          |          |
| H  | -3.90122 | -3.93069 | -0.76908 | <b>Benzene solvent Ir-H<sub>3</sub></b> |          |          |          |
| H  | -3.80520 | -3.79705 | -2.52939 | C                                       | 1.23369  | 1.02842  | -0.03079 |
| H  | -2.32105 | -3.95373 | -1.57216 | C                                       | 2.46607  | 0.33594  | -0.04123 |
| H  | -2.47467 | -0.30944 | -2.70683 | C                                       | 3.67810  | 0.99071  | -0.10672 |

|   |          |         |          |    |          |          |          |
|---|----------|---------|----------|----|----------|----------|----------|
| C | 3.72301  | 2.40366 | -0.13008 | P  | 2.28406  | -1.49116 | 0.05292  |
| C | 2.49743  | 3.09179 | -0.09995 | P  | -2.28407 | -1.49116 | 0.05277  |
| H | 4.59967  | 0.41639 | -0.14658 | Ir | -0.00000 | -1.74762 | 0.02118  |
| H | 2.50926  | 4.17780 | -0.11099 | H  | 0.00000  | -3.44690 | -0.01900 |
| C | -3.72301 | 2.40366 | -0.13019 | H  | 0.00005  | -2.06025 | -1.61420 |
| C | -3.67809 | 0.99071 | -0.10687 | H  | -0.00005 | -2.17081 | 1.63203  |
| C | -2.46607 | 0.33594 | -0.04136 | C  | 3.16851  | -2.00047 | 1.62320  |
| C | -1.23369 | 1.02842 | -0.03086 | C  | 2.70248  | -1.13965 | 2.79140  |
| C | -1.26881 | 2.43547 | -0.06456 | C  | 4.68988  | -2.03337 | 1.56331  |
| C | -2.49743 | 3.09179 | -0.09998 | H  | 2.78916  | -3.02306 | 1.77638  |
| H | -4.59966 | 0.41638 | -0.14673 | H  | 1.60917  | -1.08013 | 2.84148  |
| H | -2.50926 | 4.17780 | -0.11098 | H  | 3.06350  | -1.56263 | 3.73764  |
| C | 1.26881  | 2.43547 | -0.06452 | H  | 3.09979  | -0.11895 | 2.71199  |
| C | 0.00000  | 3.27819 | -0.04193 | H  | 5.08152  | -2.69392 | 0.78165  |
| C | 0.00000  | 0.24562 | -0.00089 | H  | 5.10981  | -1.03003 | 1.40786  |
| N | -4.92131 | 3.07258 | -0.17934 | H  | 5.08605  | -2.39587 | 2.52132  |
| N | 4.92131  | 3.07258 | -0.17917 | C  | 3.34428  | -2.13901 | -1.32984 |
| C | -0.00001 | 4.11430 | 1.25154  | C  | 2.92247  | -1.55557 | -2.67043 |
| H | -0.88504 | 4.75873 | 1.30773  | C  | 3.27513  | -3.66079 | -1.35134 |
| H | -0.00002 | 3.46341 | 2.13424  | H  | 4.37554  | -1.81945 | -1.11223 |
| H | 0.88502  | 4.75873 | 1.30775  | H  | 3.00236  | -0.46226 | -2.69211 |
| C | 0.00002  | 4.21271 | -1.26471 | H  | 3.55937  | -1.95669 | -3.46995 |
| H | 0.88175  | 4.86296 | -1.27248 | H  | 1.88269  | -1.82024 | -2.89911 |
| H | 0.00002  | 3.63354 | -2.19582 | H  | 3.59077  | -4.11575 | -0.40401 |
| H | -0.88172 | 4.86297 | -1.27249 | H  | 2.24771  | -3.99157 | -1.54864 |
| C | -4.94617 | 4.51584 | -0.12094 | H  | 3.92074  | -4.06016 | -2.14442 |
| H | -5.98093 | 4.86187 | -0.16742 | C  | -3.16861 | -2.00050 | 1.62298  |
| H | -4.50302 | 4.90265 | 0.80956  | C  | -4.68998 | -2.03337 | 1.56302  |
| H | -4.40765 | 4.96775 | -0.96618 | C  | -2.70261 | -1.13975 | 2.79124  |
| C | -6.16316 | 2.33359 | -0.14617 | H  | -2.78930 | -3.02311 | 1.77614  |
| H | -6.27007 | 1.73685 | 0.77337  | H  | -5.08160 | -2.69387 | 0.78130  |
| H | -7.00039 | 3.03352 | -0.18782 | H  | -5.08620 | -2.39592 | 2.52099  |
| H | -6.25788 | 1.65348 | -1.00445 | H  | -5.10988 | -1.03001 | 1.40760  |
| C | 4.94613  | 4.51587 | -0.12169 | H  | -1.60930 | -1.08027 | 2.84137  |
| H | 4.50276  | 4.90324 | 0.80846  | H  | -3.09989 | -0.11904 | 2.71186  |
| H | 5.98090  | 4.86189 | -0.16811 | H  | -3.06369 | -1.56277 | 3.73745  |
| H | 4.40779  | 4.96727 | -0.96733 | C  | -3.34418 | -2.13898 | -1.33008 |
| C | 6.16317  | 2.33361 | -0.14634 | C  | -3.27506 | -3.66076 | -1.35160 |
| H | 7.00039  | 3.03359 | -0.18754 | C  | -2.92226 | -1.55552 | -2.67063 |
| H | 6.27003  | 1.73645 | 0.77292  | H  | -4.37545 | -1.81940 | -1.11255 |
| H | 6.25800  | 1.65390 | -1.00494 | H  | -3.59077 | -4.11573 | -0.40429 |

|   |          |          |          |
|---|----------|----------|----------|
| H | -3.92062 | -4.06010 | -2.14473 |
| H | -2.24763 | -3.99154 | -1.54883 |
| H | -3.00216 | -0.46221 | -2.69231 |
| H | -1.88247 | -1.82018 | -2.89923 |
| H | -3.55910 | -1.95664 | -3.47021 |

88

**Benzene solvent Ir-H**

|   |          |         |          |
|---|----------|---------|----------|
| C | -1.23337 | 1.01936 | 0.00838  |
| C | -2.47001 | 0.33150 | -0.00676 |
| C | -3.68073 | 0.99093 | -0.06727 |
| C | -3.72251 | 2.40319 | -0.08299 |
| C | -2.49492 | 3.08708 | -0.05343 |
| H | -4.60372 | 0.41997 | -0.11603 |
| H | -2.50378 | 4.17319 | -0.06364 |
| C | 3.72259  | 2.40310 | -0.08296 |
| C | 3.68077  | 0.99084 | -0.06727 |
| C | 2.47003  | 0.33144 | -0.00678 |
| C | 1.23341  | 1.01933 | 0.00837  |
| C | 1.26807  | 2.42751 | -0.01818 |
| C | 2.49501  | 3.08703 | -0.05340 |
| H | 4.60375  | 0.41986 | -0.11605 |
| H | 2.50390  | 4.17313 | -0.06359 |
| C | -1.26800 | 2.42754 | -0.01818 |
| C | 0.00005  | 3.27057 | 0.00221  |
| C | 0.00001  | 0.22695 | 0.02015  |
| N | 4.91885  | 3.07689 | -0.12732 |
| N | -4.91876 | 3.07700 | -0.12737 |
| C | 0.00005  | 4.19970 | -1.22497 |
| H | 0.88193  | 4.84978 | -1.23647 |
| H | 0.00006  | 3.61560 | -2.15312 |
| H | -0.88186 | 4.84976 | -1.23649 |
| C | 0.00005  | 4.11261 | 1.29175  |
| H | -0.88485 | 4.75741 | 1.34566  |
| H | 0.00005  | 3.46540 | 2.17716  |
| H | 0.88497  | 4.75740 | 1.34566  |
| C | 4.93607  | 4.52046 | -0.17046 |
| H | 5.96976  | 4.86894 | -0.22267 |
| H | 4.40737  | 4.91184 | -1.05222 |
| H | 4.47785  | 4.96718 | 0.72468  |
| C | 6.16349  | 2.34267 | -0.12574 |

|    |          |          |          |
|----|----------|----------|----------|
| H  | 6.27073  | 1.70181  | -1.01355 |
| H  | 6.99816  | 3.04700  | -0.12313 |
| H  | 6.26429  | 1.70553  | 0.76589  |
| C  | -4.93594 | 4.52057  | -0.17061 |
| H  | -4.40722 | 4.91187  | -1.05240 |
| H  | -5.96962 | 4.86908  | -0.22286 |
| H  | -4.47772 | 4.96735  | 0.72449  |
| C  | -6.16341 | 2.34282  | -0.12580 |
| H  | -6.99807 | 3.04716  | -0.12317 |
| H  | -6.27067 | 1.70196  | -1.01362 |
| H  | -6.26422 | 1.70567  | 0.76583  |
| P  | -2.27308 | -1.49717 | 0.03031  |
| P  | 2.27306  | -1.49722 | 0.03026  |
| Ir | -0.00001 | -1.73858 | 0.01758  |
| C  | -3.28993 | -2.08547 | -1.41274 |
| C  | -3.40345 | -3.60414 | -1.39599 |
| C  | -2.63612 | -1.60284 | -2.70131 |
| H  | -4.29326 | -1.63863 | -1.32611 |
| H  | -3.96174 | -3.97856 | -0.52938 |
| H  | -3.92057 | -3.95705 | -2.29805 |
| H  | -2.40702 | -4.06565 | -1.37652 |
| H  | -2.56058 | -0.50917 | -2.74241 |
| H  | -1.61807 | -2.00777 | -2.78826 |
| H  | -3.21375 | -1.93526 | -3.57414 |
| C  | -3.18226 | -2.09690 | 1.54550  |
| C  | -4.68236 | -1.84484 | 1.59102  |
| C  | -2.49660 | -1.54711 | 2.78982  |
| H  | -2.99742 | -3.18272 | 1.50576  |
| H  | -5.20747 | -2.19949 | 0.69551  |
| H  | -5.12317 | -2.36248 | 2.45365  |
| H  | -4.89980 | -0.77560 | 1.71519  |
| H  | -1.42371 | -1.77721 | 2.78697  |
| H  | -2.60489 | -0.45516 | 2.85036  |
| H  | -2.94331 | -1.97576 | 3.69668  |
| C  | 3.28984  | -2.08551 | -1.41285 |
| C  | 2.63611  | -1.60267 | -2.70138 |
| C  | 3.40314  | -3.60420 | -1.39625 |
| H  | 4.29322  | -1.63882 | -1.32617 |
| H  | 2.56071  | -0.50899 | -2.74236 |
| H  | 3.21370  | -1.93507 | -3.57423 |
| H  | 1.61800  | -2.00747 | -2.78838 |

|   |          |          |          |   |          |         |          |
|---|----------|----------|----------|---|----------|---------|----------|
| H | 3.96136  | -3.97880 | -0.52967 | C | -0.00008 | 3.09873 | 2.39518  |
| H | 2.40664  | -4.06557 | -1.37685 | H | -0.89115 | 3.60717 | 2.78671  |
| H | 3.92023  | -3.95709 | -2.29835 | H | -0.00022 | 2.07333 | 2.78265  |
| C | 3.18225  | -2.09702 | 1.54542  | H | 0.89097  | 3.60702 | 2.78696  |
| C | 2.49650  | -1.54742 | 2.78977  | C | 4.68999  | 4.55716 | -0.78474 |
| C | 4.68234  | -1.84484 | 1.59106  | H | 5.68145  | 4.93608 | -1.04517 |
| H | 2.99750  | -3.18286 | 1.50557  | H | 3.99069  | 4.86691 | -1.57880 |
| H | 1.42363  | -1.77760 | 2.78684  | H | 4.38474  | 5.05831 | 0.14485  |
| H | 2.94319  | -1.97615 | 3.69661  | C | 5.91010  | 2.41272 | -1.10862 |
| H | 2.60472  | -0.45548 | 2.85045  | H | 5.71410  | 1.86656 | -2.04660 |
| H | 5.20754  | -2.19936 | 0.69555  | H | 6.72167  | 3.12057 | -1.29489 |
| H | 4.89967  | -0.77560 | 1.71534  | H | 6.27595  | 1.68533 | -0.36944 |
| H | 5.12314  | -2.36252 | 2.45366  | C | -4.68899 | 4.55748 | -0.78673 |
| H | -0.00003 | -3.48924 | 0.01426  | H | -3.98947 | 4.86648 | -1.58088 |

88

**Benzene solvent Ir-[]**

|   |          |         |          |    |          |          |          |
|---|----------|---------|----------|----|----------|----------|----------|
| C | -1.24090 | 0.98612 | 0.35576  | H  | -6.72118 | 3.12109  | -1.29573 |
| C | -2.42653 | 0.32395 | 0.02238  | H  | -5.71365 | 1.86722  | -2.04780 |
| C | -3.59064 | 1.01410 | -0.30717 | H  | -6.27532 | 1.68573  | -0.37061 |
| C | -3.60716 | 2.41755 | -0.30488 | P  | -2.27216 | -1.49624 | 0.01329  |
| C | -2.41286 | 3.07863 | 0.03777  | P  | 2.27192  | -1.49645 | 0.01259  |
| H | -4.47780 | 0.45637 | -0.59567 | Ir | -0.00012 | -1.77820 | 0.09413  |
| H | -2.40359 | 4.16293 | 0.03631  | C  | -3.23055 | -2.05125 | -1.48531 |
| C | 3.60757  | 2.41722 | -0.30421 | C  | -3.28472 | -3.57301 | -1.53243 |
| C | 3.59084  | 1.01378 | -0.30684 | C  | -2.58249 | -1.49093 | -2.74382 |
| C | 2.42658  | 0.32372 | 0.02242  | H  | -4.25490 | -1.65616 | -1.40232 |
| C | 1.24102  | 0.98600 | 0.35582  | H  | -3.81168 | -4.00805 | -0.67433 |
| C | 1.24869  | 2.39145 | 0.37473  | H  | -3.79972 | -3.91237 | -2.44076 |
| C | 2.41330  | 3.07842 | 0.03839  | H  | -2.27021 | -3.99652 | -1.55236 |
| H | 4.47795  | 0.45600 | -0.59534 | H  | -2.56402 | -0.39482 | -2.74511 |
| H | 2.40421  | 4.16271 | 0.03714  | H  | -1.54280 | -1.83655 | -2.82687 |
| C | -1.24840 | 2.39157 | 0.37447  | H  | -3.12738 | -1.82282 | -3.63788 |
| C | 0.00013  | 3.13237 | 0.85198  | C  | -3.30616 | -2.09229 | 1.45797  |
| C | 0.00002  | 0.19948 | 0.71384  | C  | -4.78380 | -1.73235 | 1.41821  |
| N | 4.75499  | 3.12527 | -0.62099 | C  | -2.65799 | -1.60891 | 2.74948  |
| N | -4.75444 | 3.12571 | -0.62199 | H  | -3.19869 | -3.18829 | 1.41062  |
| C | 0.00025  | 4.60139 | 0.43463  | H  | -5.29334 | -2.10903 | 0.52260  |
| H | 0.87270  | 5.12357 | 0.84205  | H  | -5.30125 | -2.15781 | 2.28887  |
| H | 0.00041  | 4.72547 | -0.65544 | H  | -4.92476 | -0.64388 | 1.45751  |
| H | -0.87227 | 5.12364 | 0.84181  | H  | -1.59897 | -1.89698 | 2.79287  |

|   |          |          |          |   |          |         |          |
|---|----------|----------|----------|---|----------|---------|----------|
| H | -2.71249 | -0.51423 | 2.83133  | H | 2.46157  | 4.16130 | 0.03557  |
| H | -3.17102 | -2.03141 | 3.62355  | C | -1.25965 | 2.41013 | 0.24542  |
| C | 3.22947  | -2.05071 | -1.48685 | C | 0.00000  | 3.16549 | 0.66631  |
| C | 2.58093  | -1.48944 | -2.74468 | C | 0.00000  | 0.25057 | 0.35424  |
| C | 3.28331  | -3.57245 | -1.53499 | N | 4.85705  | 3.11760 | -0.42596 |
| H | 4.25393  | -1.65588 | -1.40410 | N | -4.85704 | 3.11761 | -0.42597 |
| H | 2.56284  | -0.39332 | -2.74531 | C | 0.00000  | 4.61145 | 0.17288  |
| H | 3.12524  | -1.82098 | -3.63922 | H | 0.87077  | 5.15853 | 0.54896  |
| H | 1.54107  | -1.83463 | -2.82737 | H | 0.00000  | 4.67158 | -0.92256 |
| H | 3.81041  | -4.00818 | -0.67732 | H | -0.87076 | 5.15853 | 0.54896  |
| H | 2.26870  | -3.99573 | -1.55492 | C | 0.00000  | 3.19455 | 2.21148  |
| H | 3.79799  | -3.91133 | -2.44368 | H | -0.89247 | 3.71467 | 2.58471  |
| C | 3.30651  | -2.09357 | 1.45640  | H | -0.00000 | 2.17831 | 2.62410  |
| C | 2.65915  | -1.61074 | 2.74850  | H | 0.89247  | 3.71467 | 2.58471  |
| C | 4.78427  | -1.73413 | 1.41611  | C | 4.78851  | 4.53201 | -0.70309 |
| H | 3.19866  | -3.18951 | 1.40846  | H | 5.79691  | 4.91323 | -0.88428 |
| H | 1.60003  | -1.89841 | 2.79220  | H | 4.16999  | 4.77114 | -1.58496 |
| H | 3.17240  | -2.03399 | 3.62208  | H | 4.38271  | 5.09129 | 0.15132  |
| H | 2.71413  | -0.51614 | 2.83101  | C | 6.03273  | 2.39431 | -0.84089 |
| H | 5.29317  | -2.11025 | 0.51991  | H | 5.90321  | 1.86554 | -1.80182 |
| H | 4.92563  | -0.64574 | 1.45626  | H | 6.86883  | 3.09056 | -0.94817 |
| H | 5.30204  | -2.16052 | 2.28612  | H | 6.32767  | 1.64934 | -0.08803 |
| H | 0.00004  | 0.05901  | 1.81717  | C | -4.78851 | 4.53201 | -0.70311 |

88

**Benzene solvent transition state Ir-H to Ir-[] (1,2-hydride shift)**

|   |          |         |          |    |          |          |          |
|---|----------|---------|----------|----|----------|----------|----------|
| C | -1.23592 | 0.99140 | 0.22266  | H  | -5.79690 | 4.91323  | -0.88431 |
| C | -2.46558 | 0.32245 | 0.03277  | H  | -4.38270 | 5.09130  | 0.15130  |
| C | -3.65171 | 1.00730 | -0.20689 | C  | -6.03273 | 2.39431  | -0.84089 |
| C | -3.67647 | 2.41038 | -0.21711 | H  | -6.86883 | 3.09057  | -0.94817 |
| C | -2.45757 | 3.07643 | 0.02160  | H  | -5.90321 | 1.86554  | -1.80182 |
| H | -4.55973 | 0.44424 | -0.40466 | H  | -6.32766 | 1.64935  | -0.08803 |
| H | -2.46157 | 4.16130 | 0.03556  | P  | -2.30490 | -1.49243 | 0.02144  |
| C | 3.67647  | 2.41038 | -0.21710 | P  | 2.30490  | -1.49244 | 0.02143  |
| C | 3.65171  | 1.00730 | -0.20689 | Ir | -0.00000 | -1.74200 | 0.19099  |
| C | 2.46558  | 0.32245 | 0.03277  | C  | -3.12193 | -2.02020 | -1.56617 |
| C | 1.23592  | 0.99140 | 0.22266  | C  | -3.19356 | -3.53840 | -1.66192 |
| C | 1.25965  | 2.41013 | 0.24542  | C  | -2.37175 | -1.43198 | -2.75356 |
| C | 2.45757  | 3.07643 | 0.02161  | H  | -4.14298 | -1.60734 | -1.55521 |
| H | 4.55973  | 0.44423 | -0.40466 | H  | -3.79089 | -3.99000 | -0.86042 |
|   |          |         |          | H  | -3.64411 | -3.84064 | -2.61646 |
|   |          |         |          | H  | -2.18607 | -3.97603 | -1.61750 |
|   |          |         |          | H  | -2.32884 | -0.33739 | -2.71420 |

|   |          |          |          |   |         |          |          |
|---|----------|----------|----------|---|---------|----------|----------|
| H | -1.33937 | -1.80696 | -2.78267 | H | 2.86089 | -1.71887 | -3.69374 |
| H | -2.86090 | -1.71888 | -3.69373 | H | 1.33936 | -1.80695 | -2.78267 |
| C | -3.40556 | -2.15905 | 1.37495  | H | 3.79089 | -3.99000 | -0.86043 |
| C | -4.89182 | -1.85775 | 1.23584  | H | 2.18606 | -3.97603 | -1.61751 |
| C | -2.88559 | -1.68467 | 2.72720  | H | 3.64410 | -3.84063 | -2.61647 |
| H | -3.25279 | -3.24897 | 1.30671  | C | 3.40556 | -2.15906 | 1.37494  |
| H | -5.31048 | -2.16651 | 0.27028  | C | 2.88559 | -1.68469 | 2.72719  |
| H | -5.45379 | -2.38635 | 2.01730  | C | 4.89182 | -1.85776 | 1.23583  |
| H | -5.08782 | -0.78589 | 1.36820  | H | 3.25278 | -3.24898 | 1.30670  |
| H | -1.85082 | -2.00045 | 2.89959  | H | 1.85082 | -2.00046 | 2.89959  |
| H | -2.91481 | -0.58854 | 2.79664  | H | 3.50809 | -2.08617 | 3.53758  |
| H | -3.50808 | -2.08615 | 3.53759  | H | 2.91482 | -0.58855 | 2.79664  |
| C | 3.12193  | -2.02020 | -1.56618 | H | 5.31048 | -2.16651 | 0.27027  |
| C | 2.37174  | -1.43197 | -2.75356 | H | 5.08782 | -0.78590 | 1.36819  |
| C | 3.19355  | -3.53840 | -1.66193 | H | 5.45379 | -2.38636 | 2.01728  |
| H | 4.14297  | -1.60734 | -1.55522 | H | 0.00000 | -0.98923 | 1.62420  |
| H | 2.32883  | -0.33738 | -2.71420 |   |         |          |          |

## References

- (1) Hebden, T. J.; Goldberg, K. I.; Heinekey, D. M.; Zhang, X.; Emge, T. J.; Goldman, A. S.; Krogh-Jespersen, K. *Inorg. Chem.* **2010**, *49*, 1733-1742.
- (2) Polukeev, A. V.; Marcos, R.; Ahlquist, M. S. G.; Wendt, O. F. *Organometallics* **2016**, *35*, 2600-2608.
- (3) Zhao, Y.; Truhlar, D. G. *Theoretical Chemistry Accounts* **2008**, *120*, 215-241.
- (4) Hay, P. J.; Wadt, W. R. *The Journal of Chemical Physics* **1985**, *82*, 270-283.
- (5) Frisch, M. J.; Trucks, G. W.; Schlegel, H. B.; Scuseria, G. E.; Robb, M. A.; Cheeseman, J. R.; Scalmani, G.; Barone, V.; Petersson, G. A.; Nakatsuji, H.; Li, X.; Caricato, M.; Marenich, A. V.; Bloino, J.; Janesko, B. G.; Gomperts, R.; Mennucci, B.; Hratchian, H. P.; Ortiz, J. V.; Izmaylov, A. F.; Sonnenberg, J. L.; Williams; Ding, F.; Lipparini, F.; Egidi, F.; Goings, J.; Peng, B.; Petrone, A.; Henderson, T.; Ranasinghe, D.; Zakrzewski, V. G.; Gao, J.; Rega, N.; Zheng, G.; Liang, W.; Hada, M.; Ehara, M.; Toyota, K.; Fukuda, R.; Hasegawa, J.; Ishida, M.; Nakajima, T.; Honda, Y.; Kitao, O.; Nakai, H.; Vreven, T.; Throssell, K.; Montgomery Jr., J. A.; Peralta, J. E.; Ogliaro, F.; Bearpark, M. J.; Heyd, J. J.; Brothers, E. N.; Kudin, K. N.; Staroverov, V. N.; Keith, T. A.; Kobayashi, R.; Normand, J.; Raghavachari, K.; Rendell, A. P.; Burant, J. C.; Iyengar, S. S.; Tomasi, J.; Cossi, M.; Millam, J. M.; Klene, M.; Adamo, C.; Cammi, R.; Ochterski, J. W.; Martin, R. L.; Morokuma, K.; Farkas, O.; Foresman, J. B.; Fox, D. J. Wallingford, CT, **2016**.
- (6) Marenich, A. V.; Cramer, C. J.; Truhlar, D. G. *The Journal of Physical Chemistry B* **2009**, *113*, 6378-6396.
